# Supplementary material for: Differential oxidation of protein-tyrosine phosphatases during zebrafish caudal fin regeneration
Source: PubMed Central journal article supplement (PMC5559610; doi:10.1038/s41598-017-07109-8), 2017-08-16
Supplement: 41598_2017_7109_MOESM1_ESM.pdf [file 41598_2017_7109_MOESM1_ESM.pdf]

Supplementary information

Title: Differential oxidation of protein-tyrosine phosphatases during zebrafish caudal fin regeneration

Authors: Wei Wu, Alexander James Hale, Simone Lemeer and Jeroen den Hertog

**Fig. S1. Sequence alignments and logos of all predicted PTP motif peptides in the zebrafish Uniprot+trEMBL database. (a)** Sequence alignment of 52 predicted catalytic sites  $\pm 20$  flanking residues, representing 44 distinct PTPs, in the zebrafish Uniprot+trEMBL database (release Feb 2017). PTPs containing two catalytic sites are aligned as separate entries. Alignment generated with Boxshade 3.21, shading indicates sequence conservation  $>80\%$ . **(b)** Sequence logo visualized with WebLogo, overall height of stack at each position indicates sequence conservation; height of symbols within the stack indicates relative frequency of each amino acid in the position.

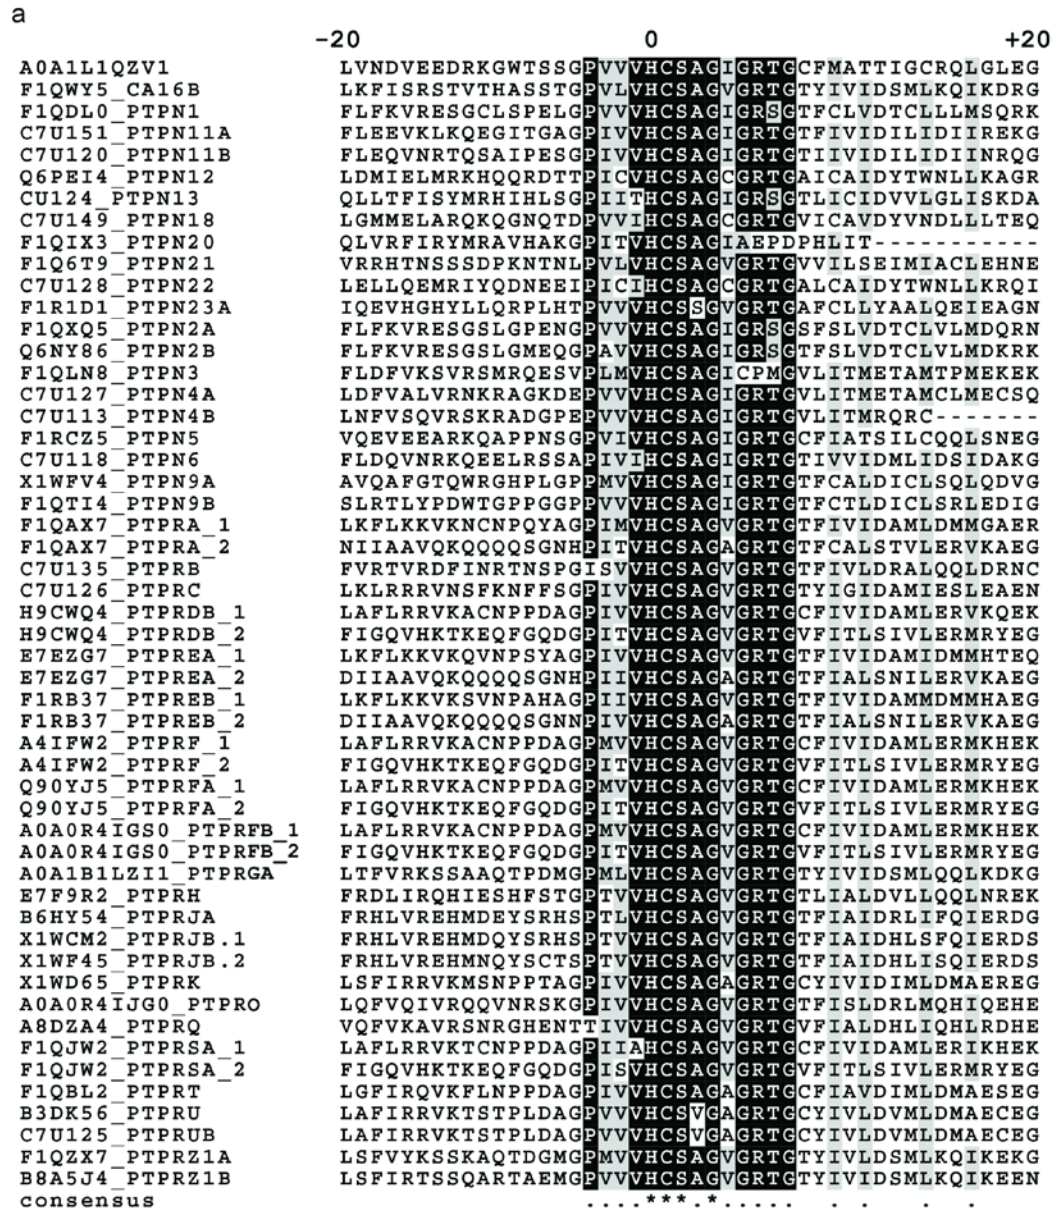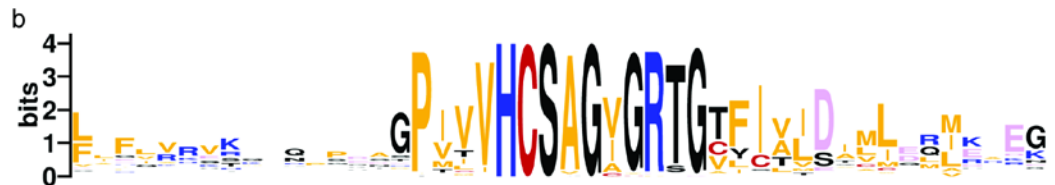

**Fig. S2. Representative raw spectrum for each zebrafish PTP catalytic site detected.**

| Uniprot Accession     | Description    | Gene name | PTP type | Sequence             | Hyperoxidised cysteine | Total MS/MS count |
|-----------------------|----------------|-----------|----------|----------------------|------------------------|-------------------|
| B3DJL5_site1 (C7U129) | Ptptra protein | ptpra     | Receptor | QQQQSGNHPITVHcSAGAGR | C14(hyper)             | 76                |

Peptide Summary  
 Sequence: QQQQSGNHPITVHCSAGAGR, C14-hyperoxidation (47.98474 Da)  
 Charge: +2, Monoisotopic m/z: 1062.48486 Da (-0.58 mmu/-0.55 ppm), MH+: 2123.96245 Da, RT: 12.88 min,  
 Identified with: Mascot (v1.30); IonScore:113, Exp Value:6.1E-010, Ions matched by search engine: 14/210  
 Fragment match tolerance used for search: 0.05 Da

Fragment Matches

Value Type: Theo. Mass [Da]

Ion Series: Neutral Losses | Precursor Ions

| #1 | b <sup>+</sup> | b <sup>2+</sup> | Seq.    | y <sup>+</sup> | y <sup>2+</sup> | #2 |
|----|----------------|-----------------|---------|----------------|-----------------|----|
| 1  | 129.06586      | 65.03657        | Q       |                |                 | 20 |
| 2  | 257.12444      | 129.06586       | Q       | 1995.90504     | 998.45616       | 19 |
| 3  | 385.18302      | 193.09515       | Q       | 1867.84646     | 934.42687       | 18 |
| 4  | 513.24160      | 257.12444       | Q       | 1739.78788     | 870.39758       | 17 |
| 5  | 600.27363      | 300.64045       | S       | 1611.72930     | 806.36829       | 16 |
| 6  | 657.29510      | 329.15119       | G       | 1524.69727     | 762.85227       | 15 |
| 7  | 771.33803      | 386.17265       | N       | 1467.67580     | 734.34154       | 14 |
| 8  | 908.39694      | 454.70211       | H       | 1353.63287     | 677.32007       | 13 |
| 9  | 1005.44971     | 503.22849       | P       | 1216.57396     | 608.79062       | 12 |
| 10 | 1118.53378     | 559.77053       | I       | 1119.52119     | 560.26423       | 11 |
| 11 | 1219.58146     | 610.29437       | T       | 1006.43712     | 503.72220       | 10 |
| 12 | 1318.64988     | 659.82858       | V       | 905.38944      | 453.19836       | 9  |
| 13 | 1455.70879     | 728.35803       | H       | 806.32102      | 403.66415       | 8  |
| 14 | 1606.70272     | 803.85500       | C-hyper | 669.26211      | 335.13469       | 7  |
| 15 | 1693.73475     | 847.37101       | S       | 518.26817      | 259.63772       | 6  |
| 16 | 1764.77187     | 882.88957       | A       | 431.23614      | 216.12171       | 5  |
| 17 | 1821.79334     | 911.40031       | G       | 360.19902      | 180.60315       | 4  |
| 18 | 1892.83046     | 946.91887       | A       | 303.17755      | 152.09241       | 3  |
| 19 | 1949.85193     | 975.42960       | G       | 232.14043      | 116.57385       | 2  |
| 20 |                |                 | R       | 175.11896      | 88.06312        | 1  |

Fragment Spectrum

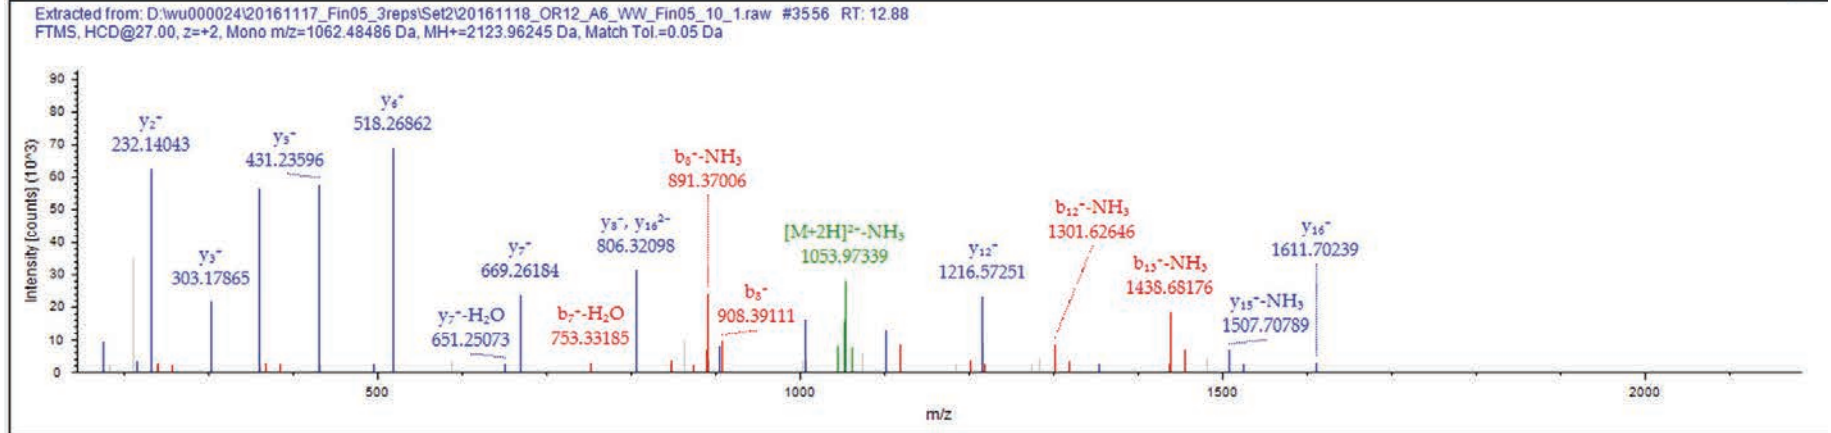

| Uniprot Accession     | Description    | Gene name | PTP type | Sequence                     | Hyperoxidised cysteine | Total MS/MS count |
|-----------------------|----------------|-----------|----------|------------------------------|------------------------|-------------------|
| B3DJL5_site2 (C7U129) | Ptptra protein | ptpra     | Receptor | NcNPQYAGPIV <b>VHcSAGVGR</b> | C14(hyper)             | 33                |

Peptide Summary  
 Sequence: NcNPQYAGPIVHCSAGVGR, C2-hydroxylation (47.98474 Da), C14-hydroxylation (47.98474 Da)  
 Charge: +2, Monoisotopic m/z: 1069.47363 Da (+0.47 mmu/+0.44 ppm), MH+: 2137.93999 Da, RT: 19.30 min,  
 Identified with: Mascot (v1.30); IonScore:108, Exp Value:1.3E-009, Ions matched by search engine: 11/190  
 Fragment match tolerance used for search: 0.05 Da

Fragment Matches

Value Type: Theo. Mass [Da]

Ion Series: Neutral Losses | Precursor Ions

| #1 | b <sup>+</sup> | b <sup>2+</sup> | Seq.    | y <sup>+</sup> | y <sup>2+</sup> | #2 |
|----|----------------|-----------------|---------|----------------|-----------------|----|
| 1  | 115.05021      | 58.02874        | N       |                |                 | 20 |
| 2  | 266.04414      | 133.52571       | C-hyper | 2023.89612     | 1012.45170      | 19 |
| 3  | 380.08707      | 190.54717       | N       | 1872.90219     | 936.95473       | 18 |
| 4  | 477.13984      | 239.07356       | P       | 1758.85926     | 879.93327       | 17 |
| 5  | 605.19842      | 303.10285       | Q       | 1661.80649     | 831.40688       | 16 |
| 6  | 768.26174      | 384.63451       | Y       | 1533.74791     | 767.37759       | 15 |
| 7  | 839.29886      | 420.15307       | A       | 1370.68459     | 685.84593       | 14 |
| 8  | 896.32033      | 448.66380       | G       | 1299.64747     | 650.32737       | 13 |
| 9  | 993.37310      | 497.19019       | P       | 1242.62600     | 621.81664       | 12 |
| 10 | 1106.45717     | 553.73222       | I       | 1145.57323     | 573.29025       | 11 |
| 11 | 1205.52559     | 603.26643       | V       | 1032.48916     | 516.74822       | 10 |
| 12 | 1304.59401     | 652.80064       | V       | 933.42074      | 467.21401       | 9  |
| 13 | 1441.65292     | 721.33010       | H       | 834.35232      | 417.67980       | 8  |
| 14 | 1592.64685     | 796.82707       | C-hyper | 697.29341      | 349.15034       | 7  |
| 15 | 1679.67888     | 840.34308       | S       | 546.29947      | 273.65337       | 6  |
| 16 | 1750.71600     | 875.86164       | A       | 459.26744      | 230.13736       | 5  |
| 17 | 1807.73747     | 904.37238       | G       | 388.23032      | 194.61880       | 4  |
| 18 | 1906.80589     | 953.90659       | V       | 331.20885      | 166.10806       | 3  |
| 19 | 1963.82736     | 982.41732       | G       | 232.14043      | 116.57385       | 2  |
| 20 |                |                 | R       | 175.11896      | 88.06312        | 1  |

Fragment Spectrum

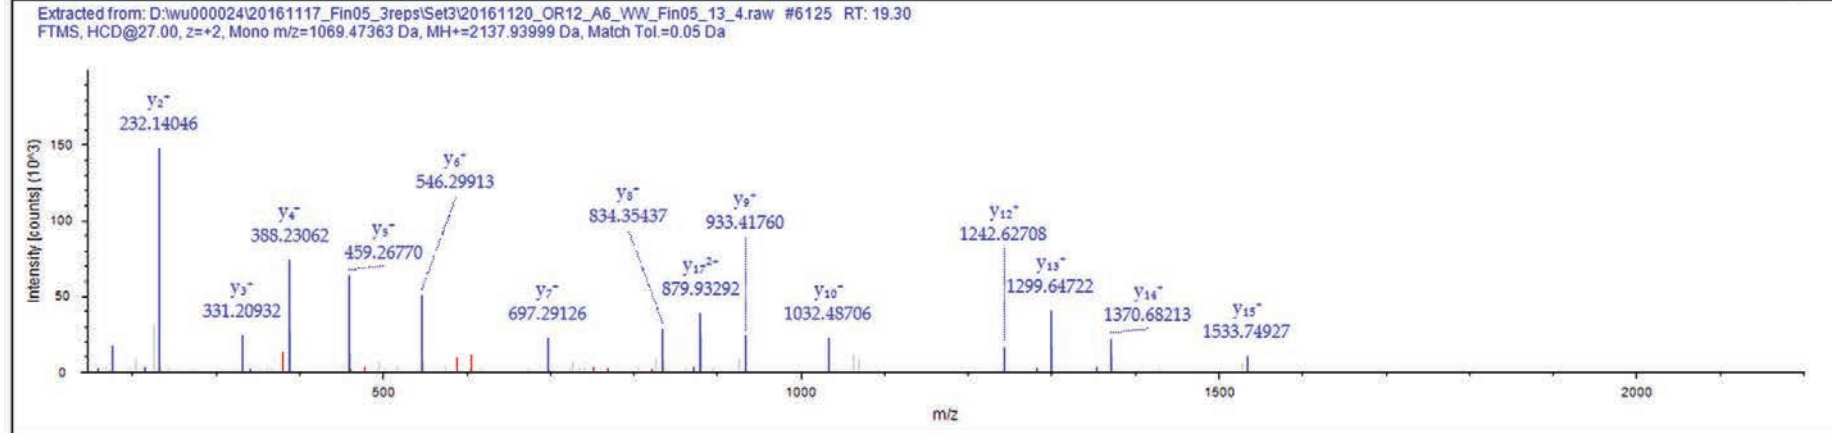



| Uniprot Accession   | Description             | Gene name | PTP type | Sequence                  | Hyperoxidised cysteine | Total MS/MS count |
|---------------------|-------------------------|-----------|----------|---------------------------|------------------------|-------------------|
| AOA0R4ITJ9 (C7U135) | Uncharacterized protein | ptprb     | Receptor | TNSPGISV <b>VHcSAGVGR</b> | C11(hyper)             | 51                |

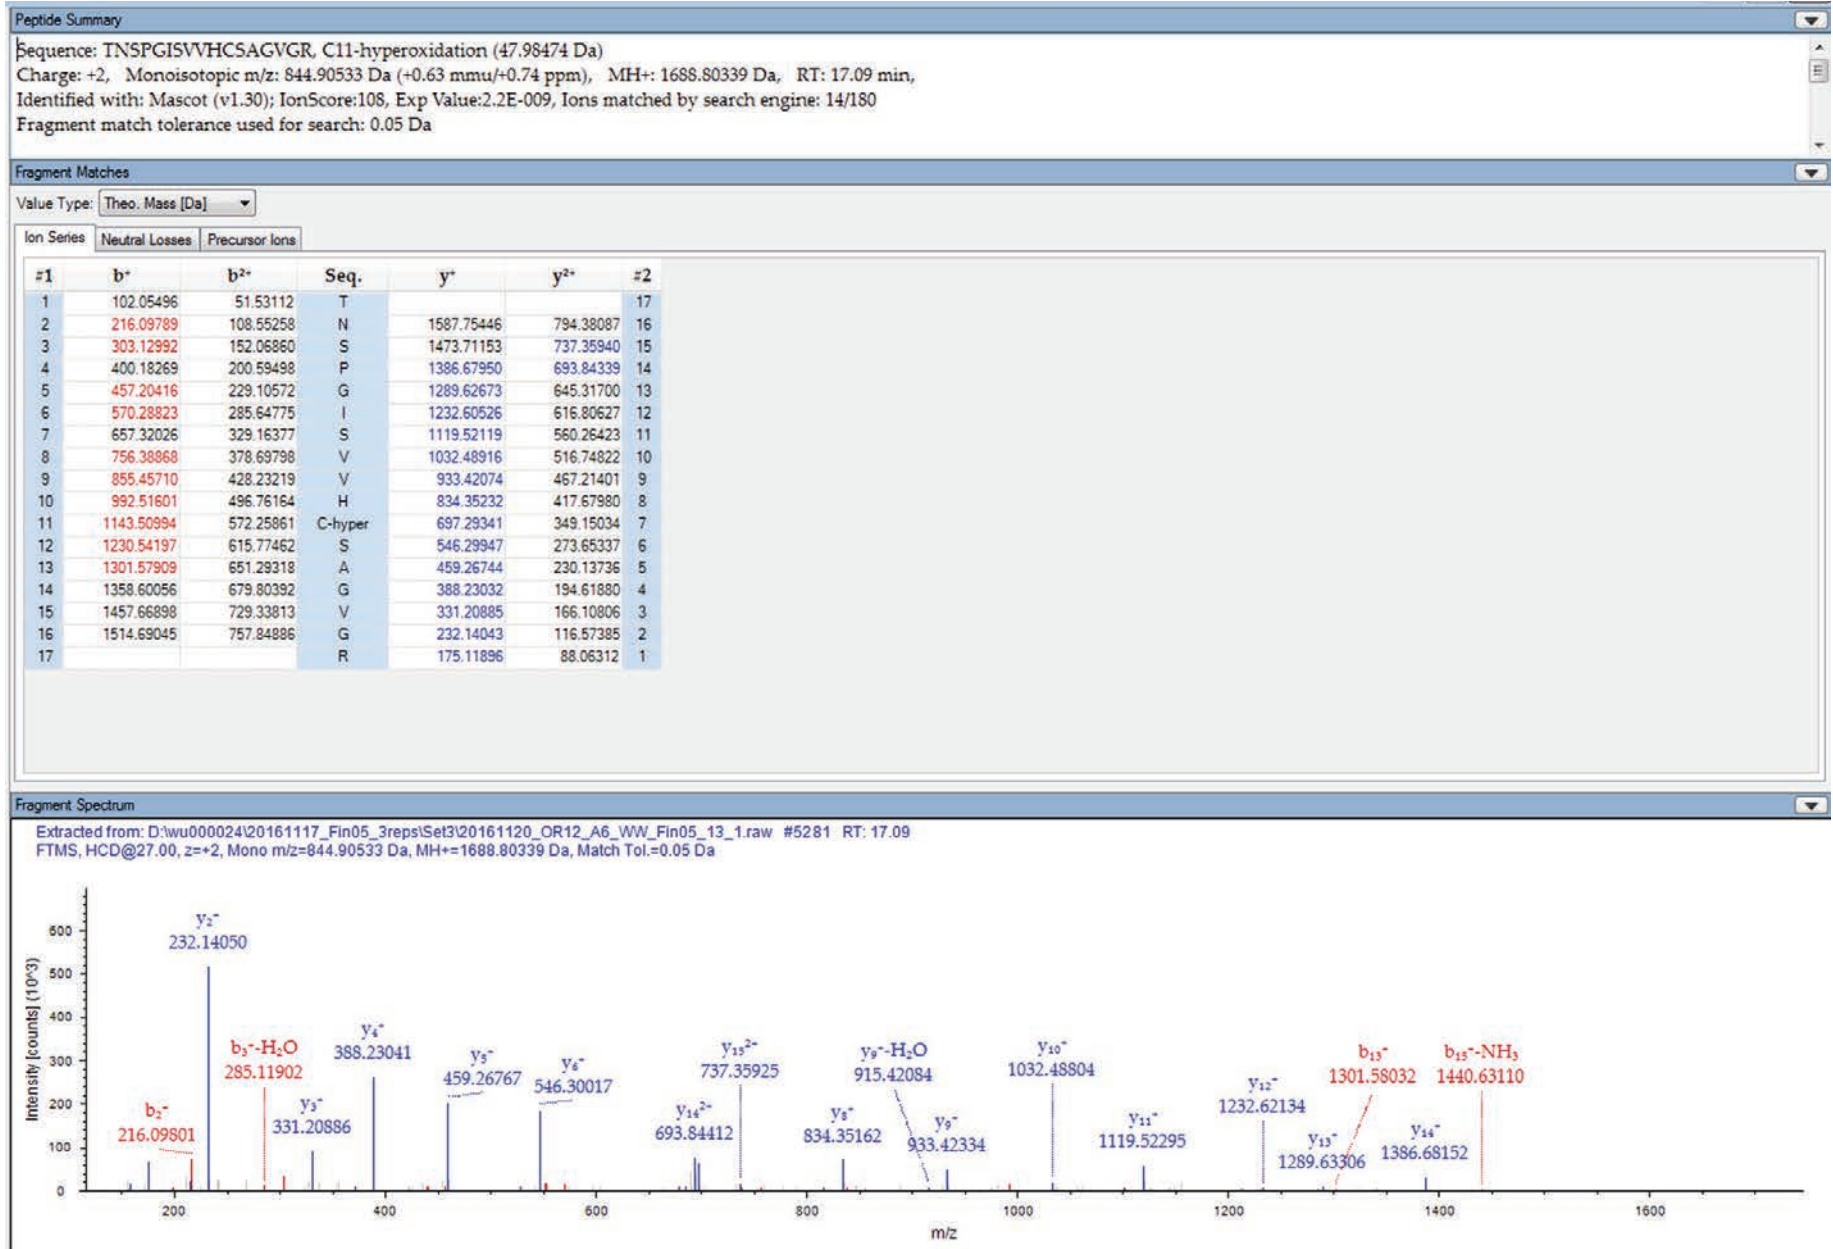

| Uniprot Accession | Description             | Gene name | PTP type | Sequence                  | Hyperoxidised cysteine | Total MS/MS count |
|-------------------|-------------------------|-----------|----------|---------------------------|------------------------|-------------------|
| C7U126            | CD45 antigen (Fragment) | ptprc     | Receptor | NFFSGPIV <b>VHcSAGVGR</b> | C11(hyper)             | 93                |

Peptide Summary

Sequence: NFFSGPIV**VHcSAGVGR**, C11-hyperoxidation (47.98474 Da)  
 Charge: +2, Monoisotopic m/z: 897.93384 Da (+0.57 mmu/+0.63 ppm), MH+: 1794.86040 Da, RT: 24.10 min,  
 Identified with: Mascot (v1.30); IonScore:129, Exp Value:1.8E-011, Ions matched by search engine: 15/176  
 Fragment match tolerance used for search: 0.05 Da

Fragment Matches

Value Type: Theo. Mass [Da]

Ion Series: Neutral Losses | Precursor Ions

| #1 | b <sup>+</sup> | b <sup>2+</sup> | Seq.    | y <sup>-</sup> | y <sup>2+</sup> | #2 |
|----|----------------|-----------------|---------|----------------|-----------------|----|
| 1  | 115.05021      | 58.02874        | N       |                |                 | 17 |
| 2  | 262.11863      | 131.56295       | F       | 1680.81634     | 840.91181       | 16 |
| 3  | 409.18705      | 205.09716       | F       | 1533.74792     | 767.37760       | 15 |
| 4  | 496.21908      | 248.61318       | S       | 1386.67950     | 693.84339       | 14 |
| 5  | 553.24055      | 277.12391       | G       | 1299.64747     | 650.32737       | 13 |
| 6  | 650.29332      | 325.65030       | P       | 1242.62600     | 621.81664       | 12 |
| 7  | 763.37739      | 382.19233       | I       | 1145.57323     | 573.29025       | 11 |
| 8  | 862.44581      | 431.72654       | V       | 1032.48916     | 516.74822       | 10 |
| 9  | 961.51423      | 481.26075       | V       | 933.42074      | 467.21401       | 9  |
| 10 | 1098.57314     | 549.79021       | H       | 834.35232      | 417.67980       | 8  |
| 11 | 1249.56707     | 625.28717       | C-hyper | 697.29341      | 349.15034       | 7  |
| 12 | 1336.59910     | 668.80319       | S       | 546.29947      | 273.65337       | 6  |
| 13 | 1407.63622     | 704.32175       | A       | 459.26744      | 230.13736       | 5  |
| 14 | 1464.65769     | 732.83248       | G       | 388.23032      | 194.61880       | 4  |
| 15 | 1563.72611     | 782.36669       | V       | 331.20885      | 166.10806       | 3  |
| 16 | 1620.74758     | 810.87743       | G       | 232.14043      | 116.57385       | 2  |
| 17 |                |                 | R       | 175.11896      | 88.06312        | 1  |

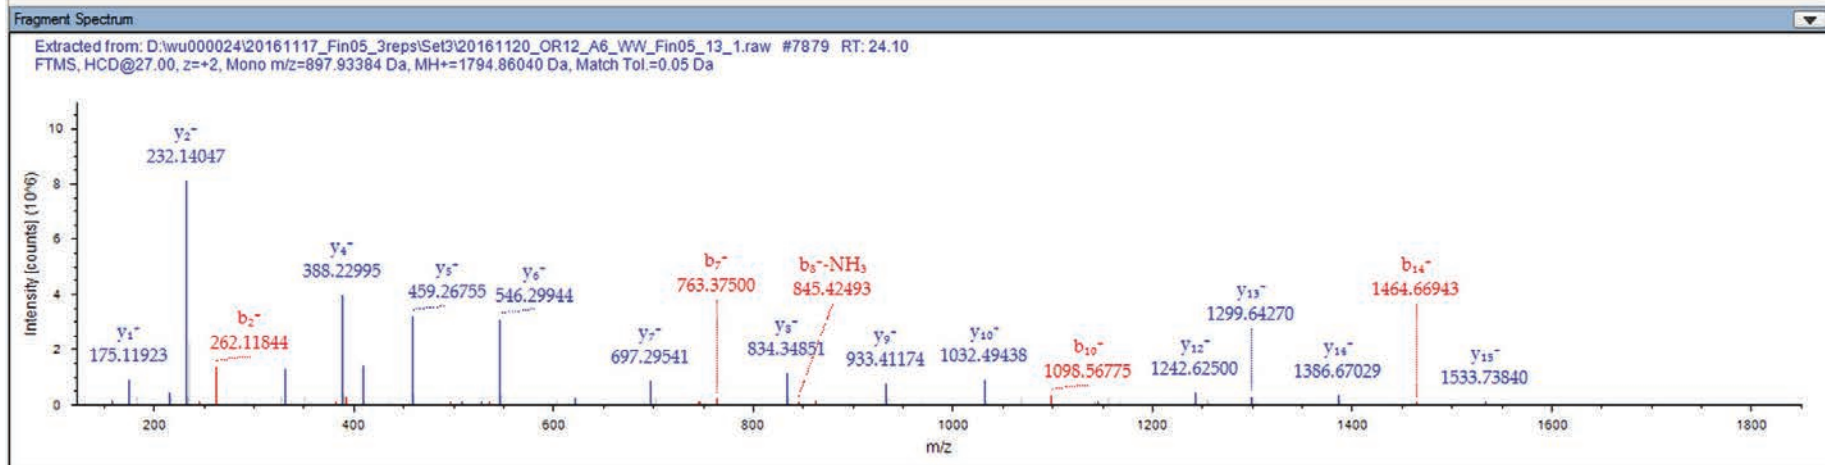

| Uniprot Accession | Description                                | Gene name | PTP type | Sequence                     | Hyperoxidised cysteine | Total MS/MS count |
|-------------------|--------------------------------------------|-----------|----------|------------------------------|------------------------|-------------------|
| E7EZG7_site1      | Receptor-type tyrosine-protein phosphatase | ptprea    | Receptor | QVNPSYAGPIV <b>VHcSAGVGR</b> | C14(hyper)             | 35                |

**Peptide Summary**  
 Sequence: QVNPSYAGPIVVHCSAGVGR, C14-hydroxylation (47.98474 Da)  
 Charge: +2, Monoisotopic m/z: 1030.00635 Da (+1.39 mmu/+1.35 ppm), MH+: 2059.00542 Da, RT: 19.28 min,  
 Identified with: Mascot (v1.30); IonScore:143, Exp Value:7.5E-013, Ions matched by search engine: 14/210  
 Fragment match tolerance used for search: 0.05 Da

**Fragment Matches**  
 Value Type: Theo. Mass [Da]

Ion Series: Neutral Losses | Precursor Ions

| #1 | b <sup>+</sup> | b <sup>2+</sup> | Seq.    | y <sup>+</sup> | y <sup>2+</sup> | #2 |
|----|----------------|-----------------|---------|----------------|-----------------|----|
| 1  | 129.06586      | 65.03657        | Q       |                |                 | 20 |
| 2  | 228.13428      | 114.57078       | V       | 1930.94406     | 965.97567       | 19 |
| 3  | 342.17721      | 171.59224       | N       | 1831.87564     | 916.44146       | 18 |
| 4  | 439.22998      | 220.11863       | P       | 1717.83271     | 859.41999       | 17 |
| 5  | 526.26201      | 263.63464       | S       | 1620.77994     | 810.89361       | 16 |
| 6  | 689.32533      | 345.16630       | Y       | 1533.74791     | 767.37759       | 15 |
| 7  | 760.36245      | 380.68486       | A       | 1370.68459     | 685.84593       | 14 |
| 8  | 817.38392      | 409.19560       | G       | 1299.64747     | 650.32737       | 13 |
| 9  | 914.43669      | 457.72198       | P       | 1242.62600     | 621.81664       | 12 |
| 10 | 1027.52076     | 514.26402       | I       | 1145.57323     | 573.29025       | 11 |
| 11 | 1126.58918     | 563.79823       | V       | 1032.48916     | 516.74822       | 10 |
| 12 | 1225.65760     | 613.33244       | V       | 933.42074      | 467.21401       | 9  |
| 13 | 1362.71651     | 681.86189       | H       | 834.35232      | 417.67980       | 8  |
| 14 | 1513.71044     | 757.35886       | C-hyper | 697.29341      | 349.15034       | 7  |
| 15 | 1600.74247     | 800.87487       | S       | 546.29947      | 273.65337       | 6  |
| 16 | 1671.77959     | 836.39343       | A       | 459.26744      | 230.13736       | 5  |
| 17 | 1728.80106     | 864.90417       | G       | 388.23032      | 194.61880       | 4  |
| 18 | 1827.86948     | 914.43838       | V       | 331.20885      | 166.10806       | 3  |
| 19 | 1884.89095     | 942.94911       | G       | 232.14043      | 116.57385       | 2  |
| 20 |                |                 | R       | 175.11896      | 88.06312        | 1  |

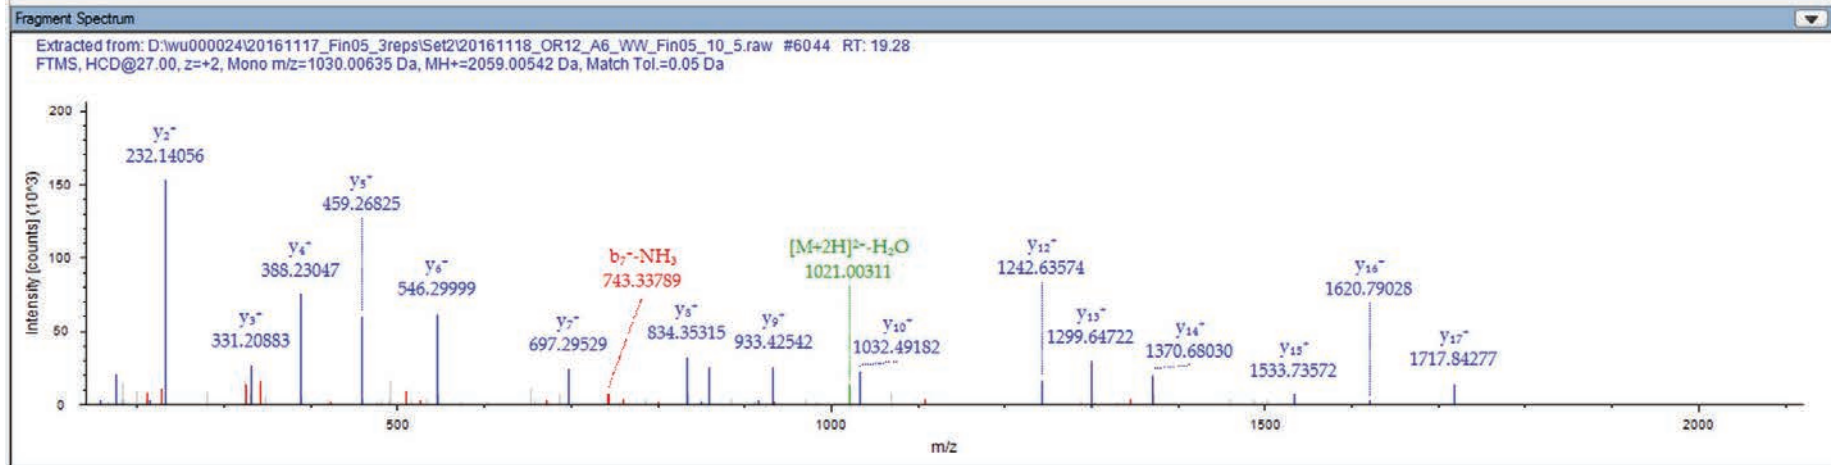



| Uniprot Accession | Description                                | Gene name | PTP type | Sequence             | Hyperoxidised cysteine | Total MS/MS count |
|-------------------|--------------------------------------------|-----------|----------|----------------------|------------------------|-------------------|
| E7EZG7_site2      | Receptor-type tyrosine-protein phosphatase | ptprea    | Receptor | QQQQSGNHPIIVHcSAGAGR | C14(hyper)             | 119               |

Peptide Summary

Sequence: QQQQSGNHPIIVHcSAGAGR, C14-hyperoxidation (47.98474 Da)  
 Charge: +2, Monoisotopic m/z: 1068.50427 Da (+0.63 mmu/+0.59 ppm), MH+: 2136.00127 Da, RT: 13.63 min,  
 Identified with: Mascot (v1.30); IonScore:103, Exp Value:7.1E-009, Ions matched by search engine: 13/210  
 Fragment match tolerance used for search: 0.05 Da

Fragment Matches

Value Type: [Theo. Mass [Da]]

| Ion Series | Neutral Losses | Precursor Ions |         |            |            |    |
|------------|----------------|----------------|---------|------------|------------|----|
| #1         | b*             | b**            | Seq.    | y*         | y**        | #2 |
| 1          | 129.06586      | 65.03657       | Q       |            |            | 20 |
| 2          | 257.12444      | 129.06586      | Q       | 2007.94143 | 1004.47435 | 19 |
| 3          | 385.18302      | 193.09515      | Q       | 1879.88285 | 940.44506  | 18 |
| 4          | 513.24160      | 257.12444      | Q       | 1751.82427 | 876.41577  | 17 |
| 5          | 600.27363      | 300.64045      | S       | 1623.76569 | 812.38648  | 16 |
| 6          | 657.29510      | 329.15119      | G       | 1536.73366 | 768.87047  | 15 |
| 7          | 771.33803      | 386.17265      | N       | 1479.71219 | 740.35973  | 14 |
| 8          | 908.39694      | 454.70211      | H       | 1365.66926 | 683.33827  | 13 |
| 9          | 1005.44971     | 503.22849      | P       | 1228.61035 | 614.80881  | 12 |
| 10         | 1118.53378     | 559.77053      | I       | 1131.55758 | 566.28243  | 11 |
| 11         | 1231.61785     | 616.31256      | I       | 1018.47351 | 509.74039  | 10 |
| 12         | 1330.69627     | 665.84677      | V       | 905.38944  | 453.19836  | 9  |
| 13         | 1467.74518     | 734.37623      | H       | 806.32102  | 403.66415  | 8  |
| 14         | 1618.73911     | 809.87319      | C-hyper | 669.26211  | 335.13469  | 7  |
| 15         | 1705.77114     | 853.38921      | S       | 518.26817  | 259.63772  | 6  |
| 16         | 1776.80826     | 888.90777      | A       | 431.23614  | 216.12171  | 5  |
| 17         | 1833.82973     | 917.41850      | G       | 360.19902  | 180.60315  | 4  |
| 18         | 1904.86685     | 952.93706      | A       | 303.17755  | 152.09241  | 3  |
| 19         | 1961.88832     | 981.44780      | G       | 232.14043  | 116.57385  | 2  |
| 20         |                |                | R       | 175.11896  | 88.06312   | 1  |

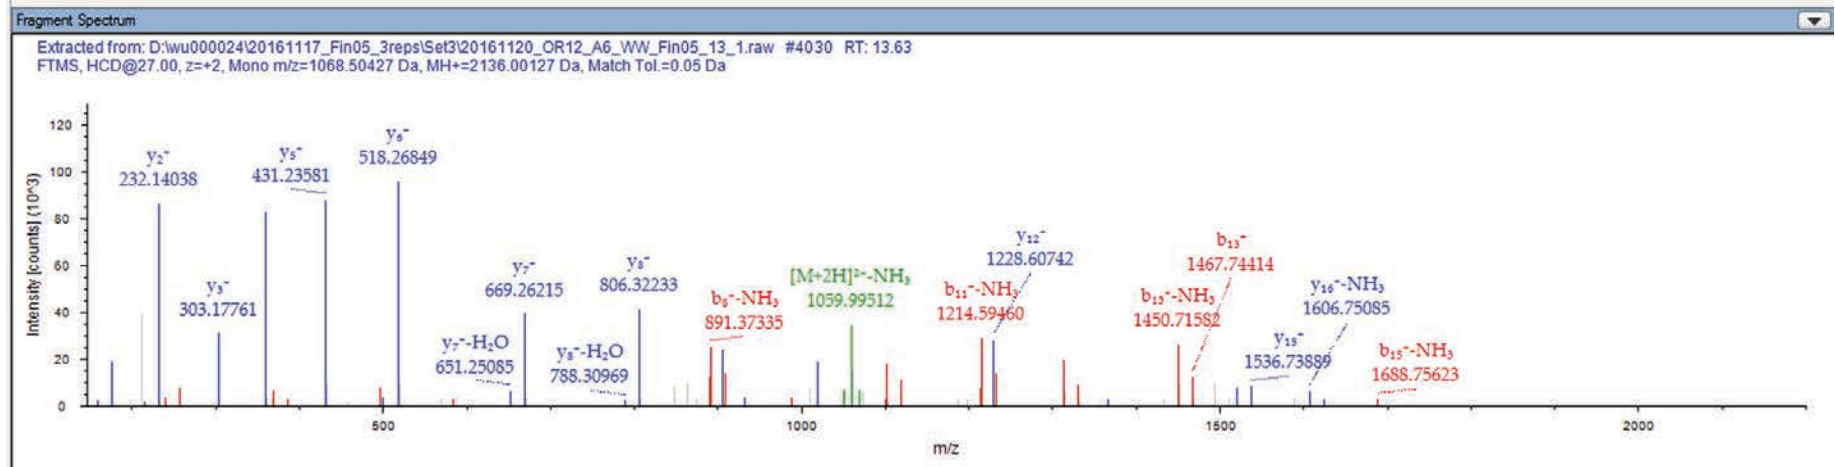

| Uniprot Accession | Description                                          | Gene name | PTP type | Sequence                     | Hyperoxidised cysteine | Total MS/MS count |
|-------------------|------------------------------------------------------|-----------|----------|------------------------------|------------------------|-------------------|
| Q90YJ5_site1      | Receptor protein-tyrosine phosphatase LAR (Fragment) | ptprfa    | Receptor | AcNPPDAGPMV <b>VHcSAGVGR</b> | C14(hyper)             | 100               |

Peptide Summary

Sequence: ACNPPDAGPMV**VHcSAGVGR**, C2-hyperoxidation (47.98474 Da), C14-hyperoxidation (47.98474 Da)  
 Charge: +2, Monoisotopic m/z: 1017.42896 Da (+1.57 mmu/+1.55 ppm), MH+: 2033.85063 Da, RT: 17.82 min,  
 Identified with: Mascot (v1.30); IonScore:88, Exp Value:9.7E-008, Ions matched by search engine: 14/204  
 Fragment match tolerance used for search: 0.05 Da

Fragment Matches

Value Type: Theo. Mass [Da]

Ion Series: Neutral Losses Precursor Ions

| #1 | b <sup>+</sup> | b <sup>2+</sup> | Seq.    | y <sup>+</sup> | y <sup>2+</sup> | #2 |
|----|----------------|-----------------|---------|----------------|-----------------|----|
| 1  | 72.04440       | 36.52584        | A       |                |                 | 20 |
| 2  | 223.03833      | 112.02280       | C-hyper | 1962.81037     | 981.90882       | 19 |
| 3  | 337.08126      | 169.04427       | N       | 1811.81644     | 906.41186       | 18 |
| 4  | 434.13403      | 217.57065       | P       | 1697.77351     | 849.39039       | 17 |
| 5  | 531.18680      | 266.09704       | P       | 1600.72074     | 800.86401       | 16 |
| 6  | 646.21375      | 323.61051       | D       | 1503.66797     | 752.33762       | 15 |
| 7  | 717.25087      | 359.12907       | A       | 1388.64102     | 694.82415       | 14 |
| 8  | 774.27234      | 387.63981       | G       | 1317.60390     | 659.30559       | 13 |
| 9  | 871.32511      | 436.16619       | P       | 1260.58243     | 630.79485       | 12 |
| 10 | 1002.36561     | 501.68644       | M       | 1163.52966     | 582.26847       | 11 |
| 11 | 1101.43403     | 551.22065       | V       | 1032.48916     | 516.74822       | 10 |
| 12 | 1200.50245     | 600.75486       | V       | 933.42074      | 467.21401       | 9  |
| 13 | 1337.56136     | 669.28432       | H       | 834.35232      | 417.67980       | 8  |
| 14 | 1488.55529     | 744.78129       | C-hyper | 697.29341      | 349.15034       | 7  |
| 15 | 1575.58732     | 788.29730       | S       | 546.29947      | 273.65337       | 6  |
| 16 | 1646.62444     | 823.81586       | A       | 459.26744      | 230.13736       | 5  |
| 17 | 1703.64591     | 852.32660       | G       | 388.23032      | 194.61880       | 4  |
| 18 | 1802.71433     | 901.86081       | V       | 331.20885      | 166.10806       | 3  |
| 19 | 1859.73580     | 930.37154       | G       | 232.14043      | 116.57385       | 2  |
| 20 |                |                 | R       | 175.11896      | 88.06312        | 1  |

Fragment Spectrum

Extracted from: D:\wu000024\20161117\_Fin05\_3reps\Set2\20161118\_OR12\_A6\_WW\_Fin05\_10\_1.raw #5339 RT: 17.82  
 FTMS, HCD@27.00, z=+2, Mono m/z=1017.42896 Da, MH+=2033.85063 Da, Match Tol.=0.05 Da

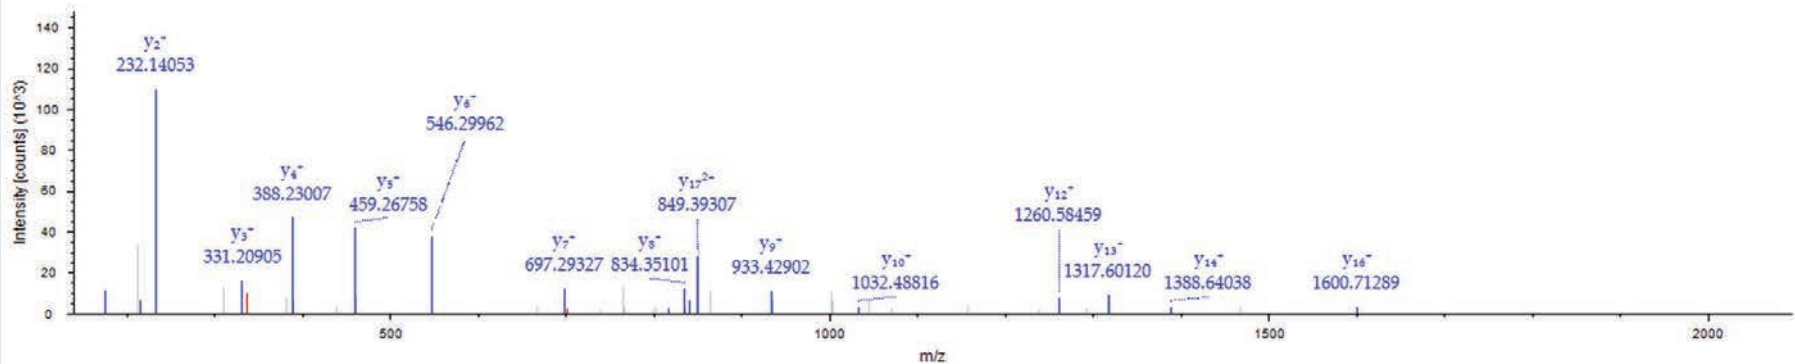

| Uniprot Accession | Description                                          | Gene name | PTP type | Sequence            | Hyperoxidised cysteine | Total MS/MS count |
|-------------------|------------------------------------------------------|-----------|----------|---------------------|------------------------|-------------------|
| Q90YJ5_site2      | Receptor protein-tyrosine phosphatase LAR (Fragment) | ptprfa    | Receptor | EQFGQDGPITVHcSAGVGR | C13(hyper)             | 72                |

Peptide Summary

Sequence: EQFGQDGPITVHCSAGVGR, C13-hyperoxidation (47.98474 Da)  
 Charge: +2, Monoisotopic m/z: 1003.45660 Da (+1.3 mmu/+1.3 ppm), MH+: 2005.90593 Da, RT: 18.24 min,  
 Identified with: Mascot (v1.30); IonScore:124, Exp Value:4.3E-011, Ions matched by search engine: 15/204  
 Fragment match tolerance used for search: 0.05 Da

Fragment Matches

Value Type: Theo. Mass [Da]

Ion Series: Neutral Losses, Precursor Ions

| #1 | b <sup>+</sup> | b <sup>2+</sup> | Seq.    | y <sup>+</sup> | y <sup>2+</sup> | #2 |
|----|----------------|-----------------|---------|----------------|-----------------|----|
| 1  | 130.04988      | 65.52858        | E       |                |                 | 19 |
| 2  | 258.10846      | 129.55787       | Q       | 1876.86073     | 938.93400       | 18 |
| 3  | 405.17688      | 203.09208       | F       | 1748.80215     | 874.90471       | 17 |
| 4  | 462.19835      | 231.60281       | G       | 1601.73373     | 801.37050       | 16 |
| 5  | 590.25693      | 295.63210       | Q       | 1544.71226     | 772.85977       | 15 |
| 6  | 705.28388      | 353.14558       | D       | 1416.65368     | 708.83048       | 14 |
| 7  | 762.30535      | 381.65631       | G       | 1301.62673     | 651.31700       | 13 |
| 8  | 859.35812      | 430.18270       | P       | 1244.60526     | 622.80627       | 12 |
| 9  | 972.44219      | 486.72473       | I       | 1147.55249     | 574.27988       | 11 |
| 10 | 1073.48987     | 537.24857       | T       | 1034.46842     | 517.73785       | 10 |
| 11 | 1172.55829     | 586.78278       | V       | 933.42074      | 467.21401       | 9  |
| 12 | 1309.61720     | 655.31224       | H       | 834.35232      | 417.67980       | 8  |
| 13 | 1460.61113     | 730.80920       | C-hyper | 697.29341      | 349.15034       | 7  |
| 14 | 1547.64316     | 774.32522       | S       | 546.29947      | 273.65337       | 6  |
| 15 | 1618.68028     | 809.84378       | A       | 459.26744      | 230.13736       | 5  |
| 16 | 1675.70175     | 838.35451       | G       | 388.23032      | 194.61880       | 4  |
| 17 | 1774.77017     | 887.88872       | V       | 331.20885      | 166.10806       | 3  |
| 18 | 1831.79164     | 916.39946       | G       | 232.14043      | 116.57385       | 2  |
| 19 |                |                 | R       | 175.11896      | 88.06312        | 1  |

Fragment Spectrum

Extracted from: D:\wu000024\20161117\_Fin05\_3reps\Set2\20161118\_OR12\_A6\_WW\_Fin05\_7\_1.raw #5734 RT: 18.24  
 FTMS, HCD@27.00, z=+2, Mono m/z=1003.45660 Da, MH+=2005.90593 Da, Match Tol.=0.05 Da

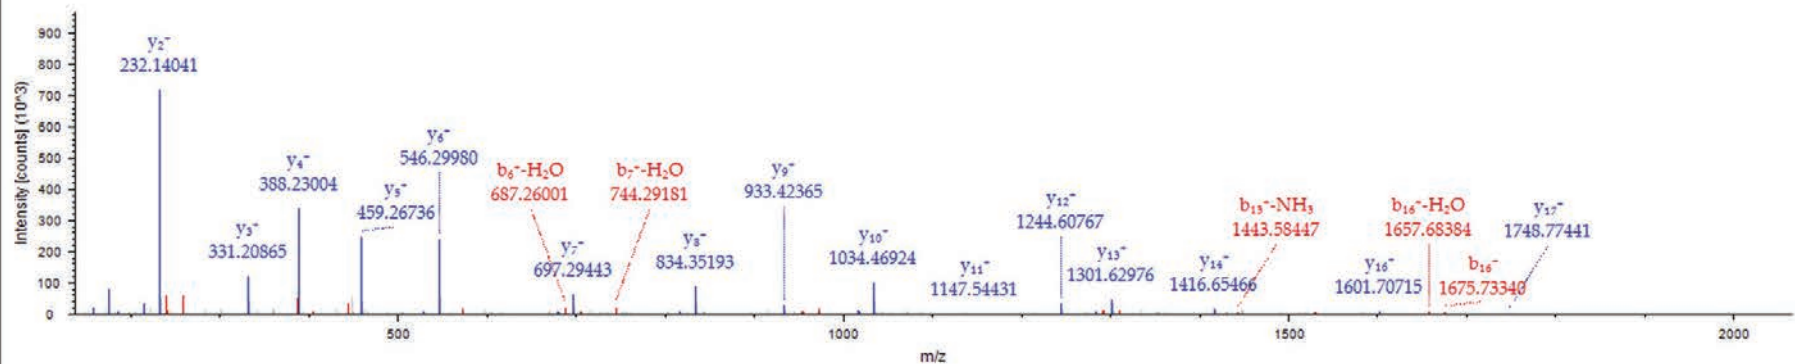



| Uniprot Accession | Description                        | Gene name | PTP type | Sequence               | Hyperoxidised cysteine | Total MS/MS count |
|-------------------|------------------------------------|-----------|----------|------------------------|------------------------|-------------------|
| F1Q4V8            | Uncharacterized protein (Fragment) | ptprga    | Receptor | SSAAQTPDMGPMLVHCSAGVGR | C16(hyper)             | 42                |

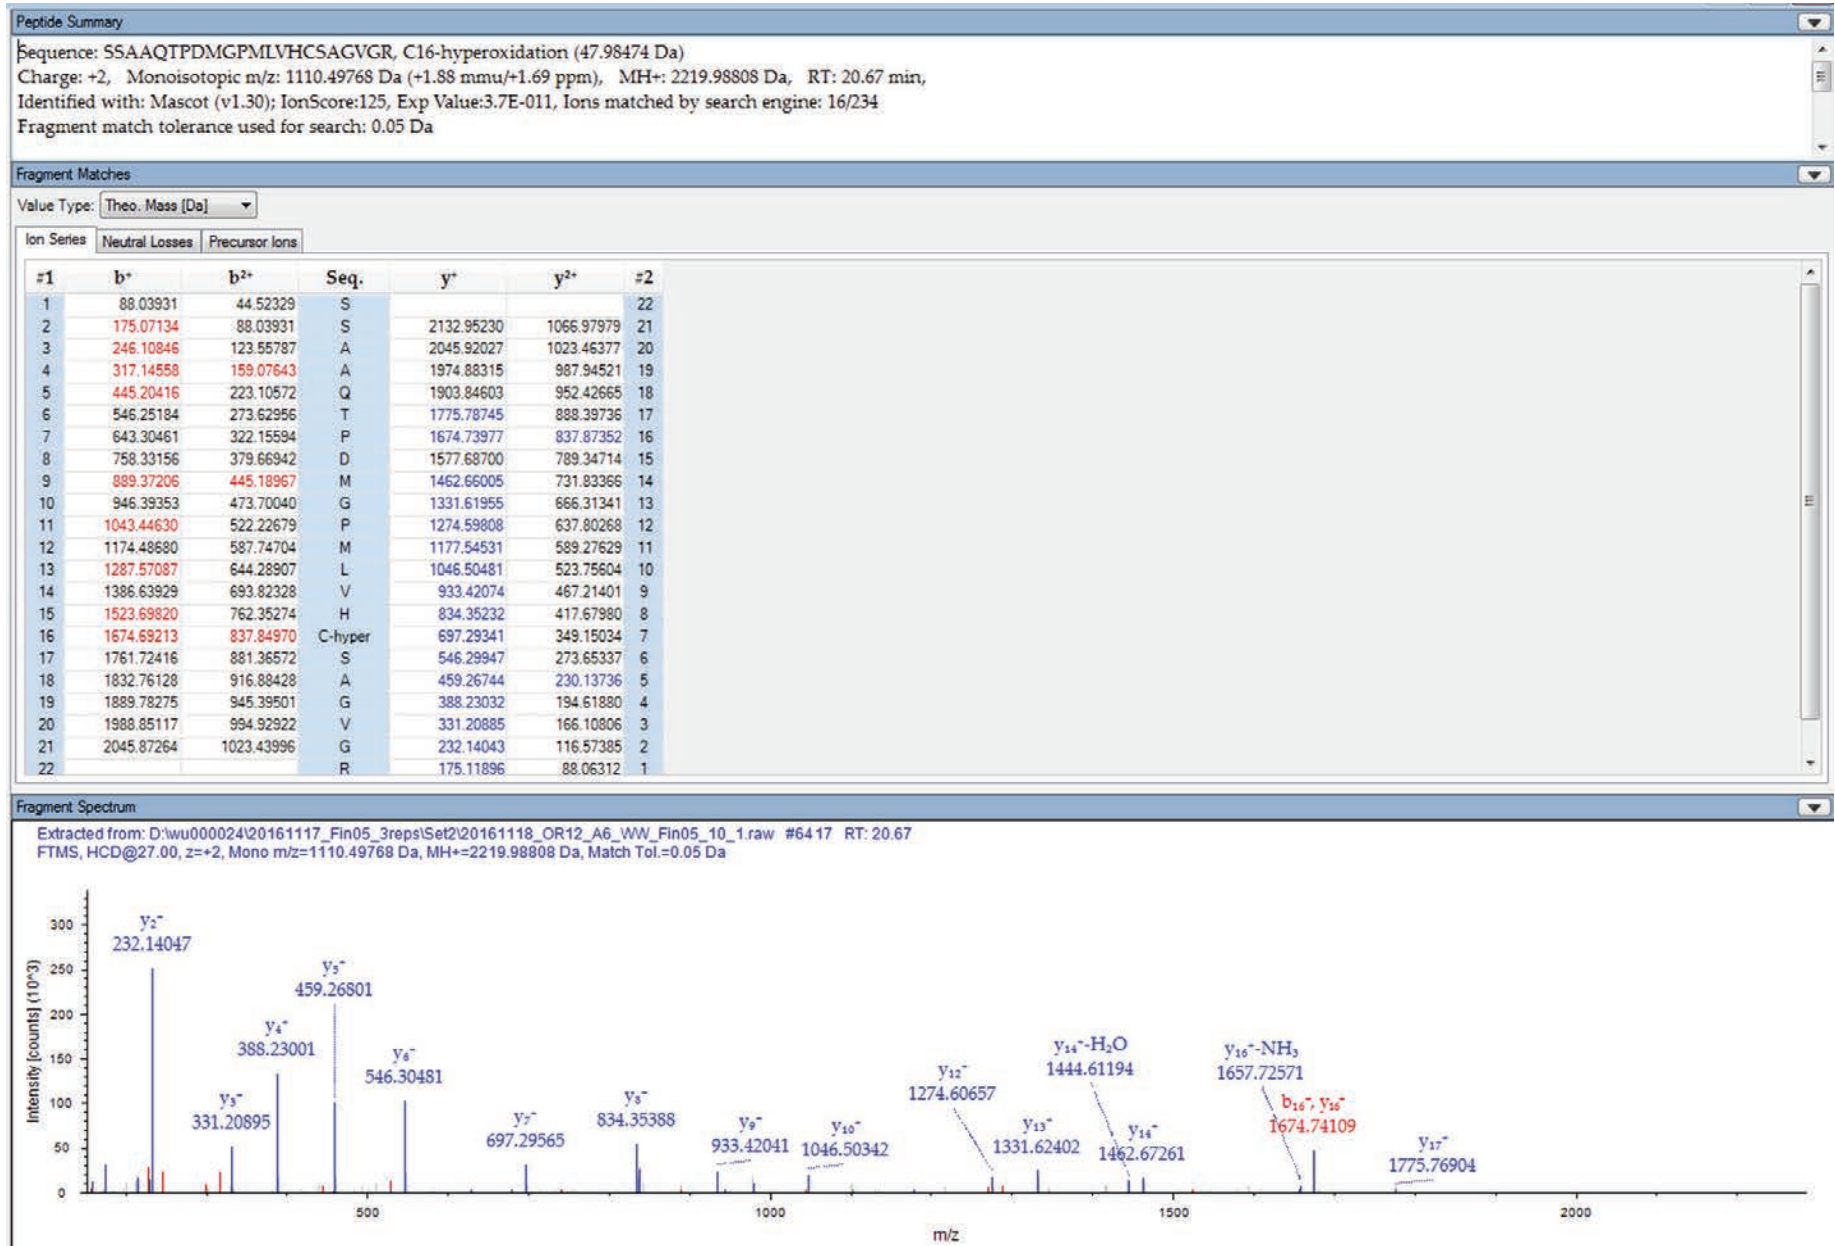



| Uniprot Accession | Description             | Gene name | PTP type | Sequence               | Hyperoxidised cysteine | Total MS/MS count |
|-------------------|-------------------------|-----------|----------|------------------------|------------------------|-------------------|
| E7F9R2            | Uncharacterized protein | ptprh     | Receptor | QHIESHFSTGPTVVHcSAGVGR | C16(hyper)             | 159               |

Peptide Summary

Sequence: QHIESHFSTGPTVVHCSAGVGR, C16-hyperoxidation (47.98474 Da)  
 Charge: +3, Monoisotopic m/z: 785.36920 Da (-0.42 mmu/-0.53 ppm), MH+: 2354.09305 Da, RT: 16.03 min,  
 Identified with: Mascot (v1.30); IonScore:76, Exp Value:3.4E-006, Ions matched by search engine: 11/236  
 Fragment match tolerance used for search: 0.05 Da

Fragment Matches

Value Type: Theo. Mass [Da]

Ion Series: Neutral Losses | Precursor Ions

| #1 | b <sup>+</sup> | b <sup>2+</sup> | b <sup>3+</sup> | Seq.    | y <sup>+</sup> | y <sup>2+</sup> | y <sup>3+</sup> | #2 |
|----|----------------|-----------------|-----------------|---------|----------------|-----------------|-----------------|----|
| 1  | 129.06586      | 65.03657        | 43.69347        | Q       |                |                 |                 | 22 |
| 2  | 266.12477      | 133.56602       | 89.37977        | H       | 2226.03573     | 1113.52150      | 742.68343       | 21 |
| 3  | 379.20884      | 190.10806       | 127.07446       | I       | 2088.97682     | 1044.99205      | 696.99712       | 20 |
| 4  | 508.25144      | 254.62936       | 170.08866       | E       | 1975.89275     | 988.45001       | 659.30243       | 19 |
| 5  | 595.28347      | 298.14537       | 199.09934       | S       | 1846.85015     | 923.92871       | 616.28823       | 18 |
| 6  | 732.34238      | 366.67483       | 244.78564       | H       | 1759.81812     | 880.41270       | 587.27756       | 17 |
| 7  | 879.41080      | 440.20904       | 293.80845       | F       | 1622.75921     | 811.88324       | 541.59125       | 16 |
| 8  | 966.44283      | 483.72505       | 322.81913       | S       | 1475.69079     | 738.34903       | 492.56845       | 15 |
| 9  | 1067.49051     | 534.24889       | 356.50169       | T       | 1388.65876     | 694.83302       | 463.55777       | 14 |
| 10 | 1124.51198     | 562.75963       | 375.50884       | G       | 1287.61108     | 644.30918       | 429.87521       | 13 |
| 11 | 1221.56475     | 611.28601       | 407.85977       | P       | 1230.58961     | 615.79844       | 410.86805       | 12 |
| 12 | 1322.61243     | 661.80985       | 441.54233       | T       | 1133.53684     | 567.27206       | 378.51713       | 11 |
| 13 | 1421.68085     | 711.34406       | 474.56513       | V       | 1032.48916     | 516.74822       | 344.83457       | 10 |
| 14 | 1520.74927     | 760.87827       | 507.58794       | V       | 933.42074      | 467.21401       | 311.81176       | 9  |
| 15 | 1657.80818     | 829.40773       | 553.27424       | H       | 834.35232      | 417.67980       | 278.78896       | 8  |
| 16 | 1808.80211     | 904.90469       | 603.60555       | C-hyper | 697.29341      | 349.15034       | 233.10265       | 7  |
| 17 | 1895.83414     | 948.42071       | 632.61623       | S       | 546.29947      | 273.65337       | 182.77134       | 6  |
| 18 | 1966.87126     | 983.93927       | 656.29527       | A       | 459.26744      | 230.13736       | 153.76066       | 5  |
| 19 | 2023.89273     | 1012.45000      | 675.30243       | G       | 388.23032      | 194.61880       | 130.08162       | 4  |
| 20 | 2122.96115     | 1061.98421      | 708.32523       | V       | 331.20885      | 166.10806       | 111.07447       | 3  |
| 21 | 2179.98262     | 1090.49495      | 727.33239       | G       | 232.14043      | 116.57385       | 78.05166        | 2  |
| 22 |                |                 |                 | R       | 175.11896      | 88.06312        | 59.04450        | 1  |

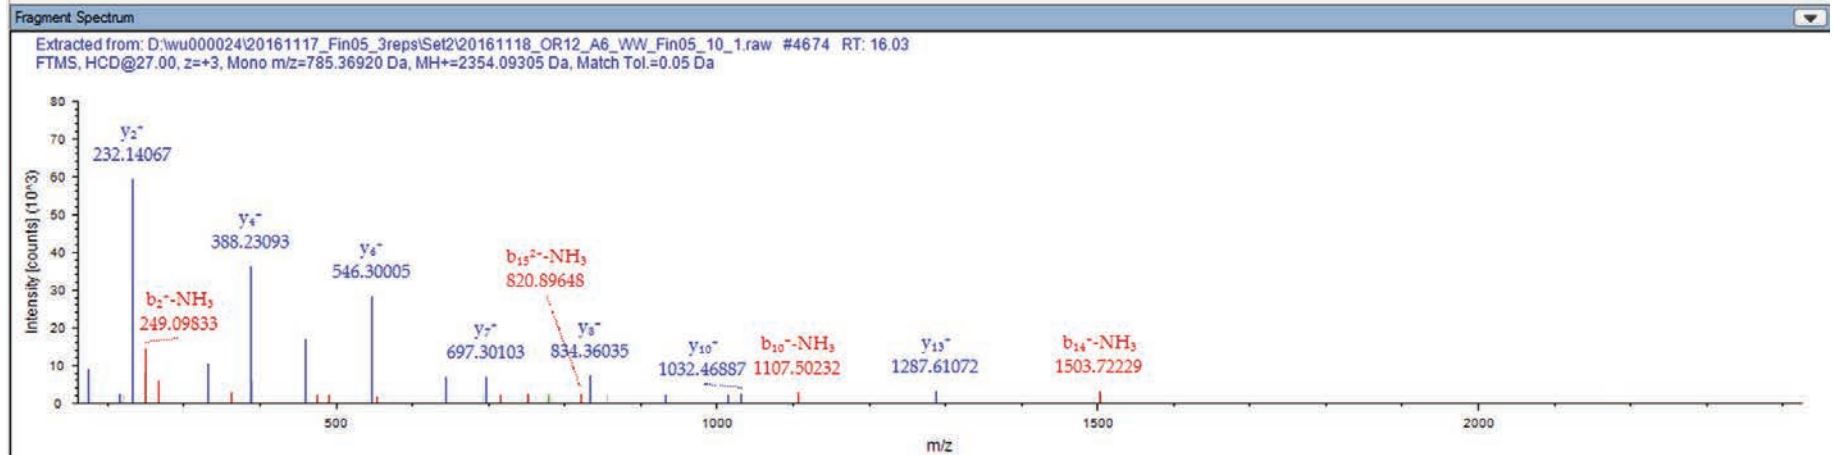

| Uniprot Accession | Description                  | Gene name | PTP type | Sequence       | Hyperoxidised cysteine | Total MS/MS count |
|-------------------|------------------------------|-----------|----------|----------------|------------------------|-------------------|
| B6HY54            | Protein-tyrosine phosphatase | ptprja    | Receptor | HSPTLVHcSAGVGR | C8(hyper)              | 52                |

Peptide Summary  
 Sequence: HSPTLVHCSAGVGR, C8-hyperoxidation (47.98474 Da)  
 Charge: +2, Monoisotopic m/z: 734.85175 Da (+0.01 mmu/+0.01 ppm), MH+: 1468.69621 Da, RT: 14.24 min,  
 Identified with: Mascot (v1.30); IonScore:109, Exp Value:1.6E-009, Ions matched by search engine: 11/118  
 Fragment match tolerance used for search: 0.05 Da

Fragment Matches

Value Type: Theo. Mass [Da]

Ion Series: Neutral Losses | Precursor Ions

| #1 | b <sup>+</sup> | b <sup>2+</sup> | Seq.    | y <sup>+</sup> | y <sup>2+</sup> | #2 |
|----|----------------|-----------------|---------|----------------|-----------------|----|
| 1  | 138.06619      | 69.53673        | H       |                |                 | 14 |
| 2  | 225.09822      | 113.05275       | S       | 1331.63729     | 666.32228       | 13 |
| 3  | 322.15099      | 161.57913       | P       | 1244.60526     | 622.80627       | 12 |
| 4  | 423.19867      | 212.10297       | T       | 1147.55249     | 574.27988       | 11 |
| 5  | 536.28274      | 268.64501       | L       | 1046.50481     | 523.75604       | 10 |
| 6  | 635.35116      | 318.17922       | V       | 933.42074      | 467.21401       | 9  |
| 7  | 772.41007      | 386.70867       | H       | 834.35232      | 417.67980       | 8  |
| 8  | 923.40400      | 462.20564       | C-hyper | 697.29341      | 349.15034       | 7  |
| 9  | 1010.43603     | 505.72165       | S       | 546.29947      | 273.65337       | 6  |
| 10 | 1081.47315     | 541.24021       | A       | 459.26744      | 230.13736       | 5  |
| 11 | 1138.49462     | 569.75095       | G       | 388.23032      | 194.61880       | 4  |
| 12 | 1237.56304     | 619.28516       | V       | 331.20885      | 166.10806       | 3  |
| 13 | 1294.58451     | 647.79589       | G       | 232.14043      | 116.57385       | 2  |
| 14 |                |                 | R       | 175.11896      | 88.06312        | 1  |

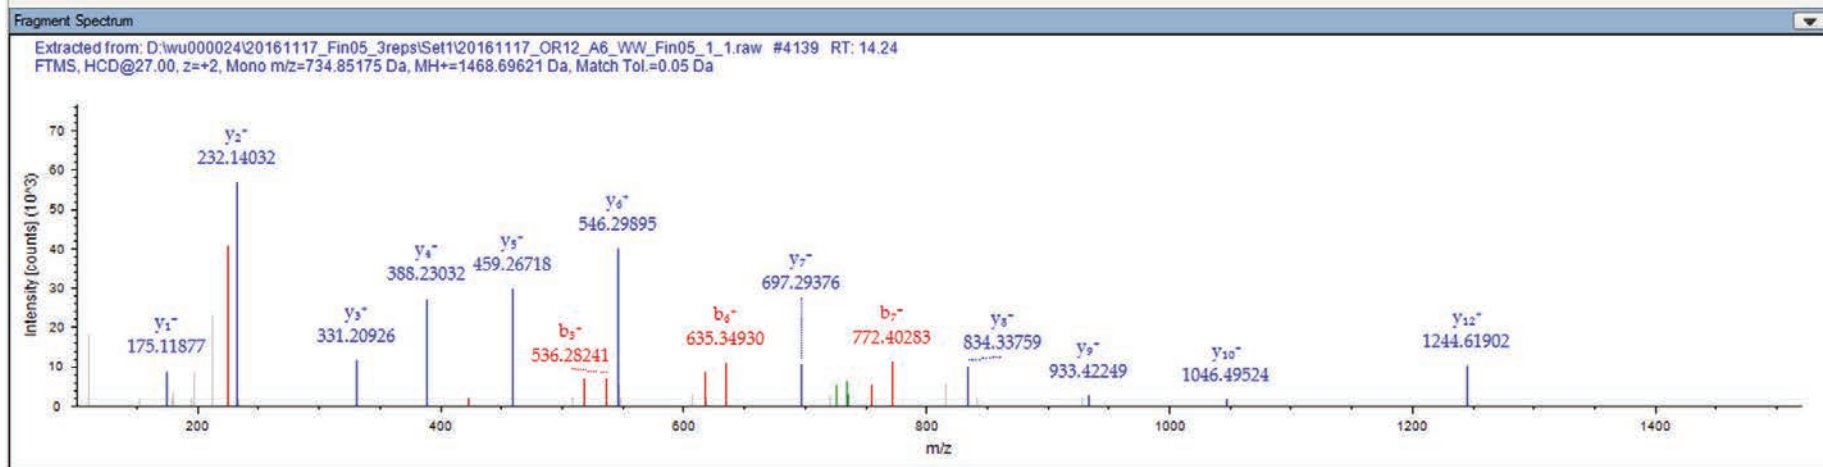

| Uniprot Accession | Description                        | Gene name | PTP type | Sequence               | Hyperoxidised cysteine | Total MS/MS count |
|-------------------|------------------------------------|-----------|----------|------------------------|------------------------|-------------------|
| X1WCM2            | Uncharacterized protein (Fragment) | ptrjrb.1  | Receptor | HSPTV <b>VHcSAGVGR</b> | C8(hyper)              | 21                |

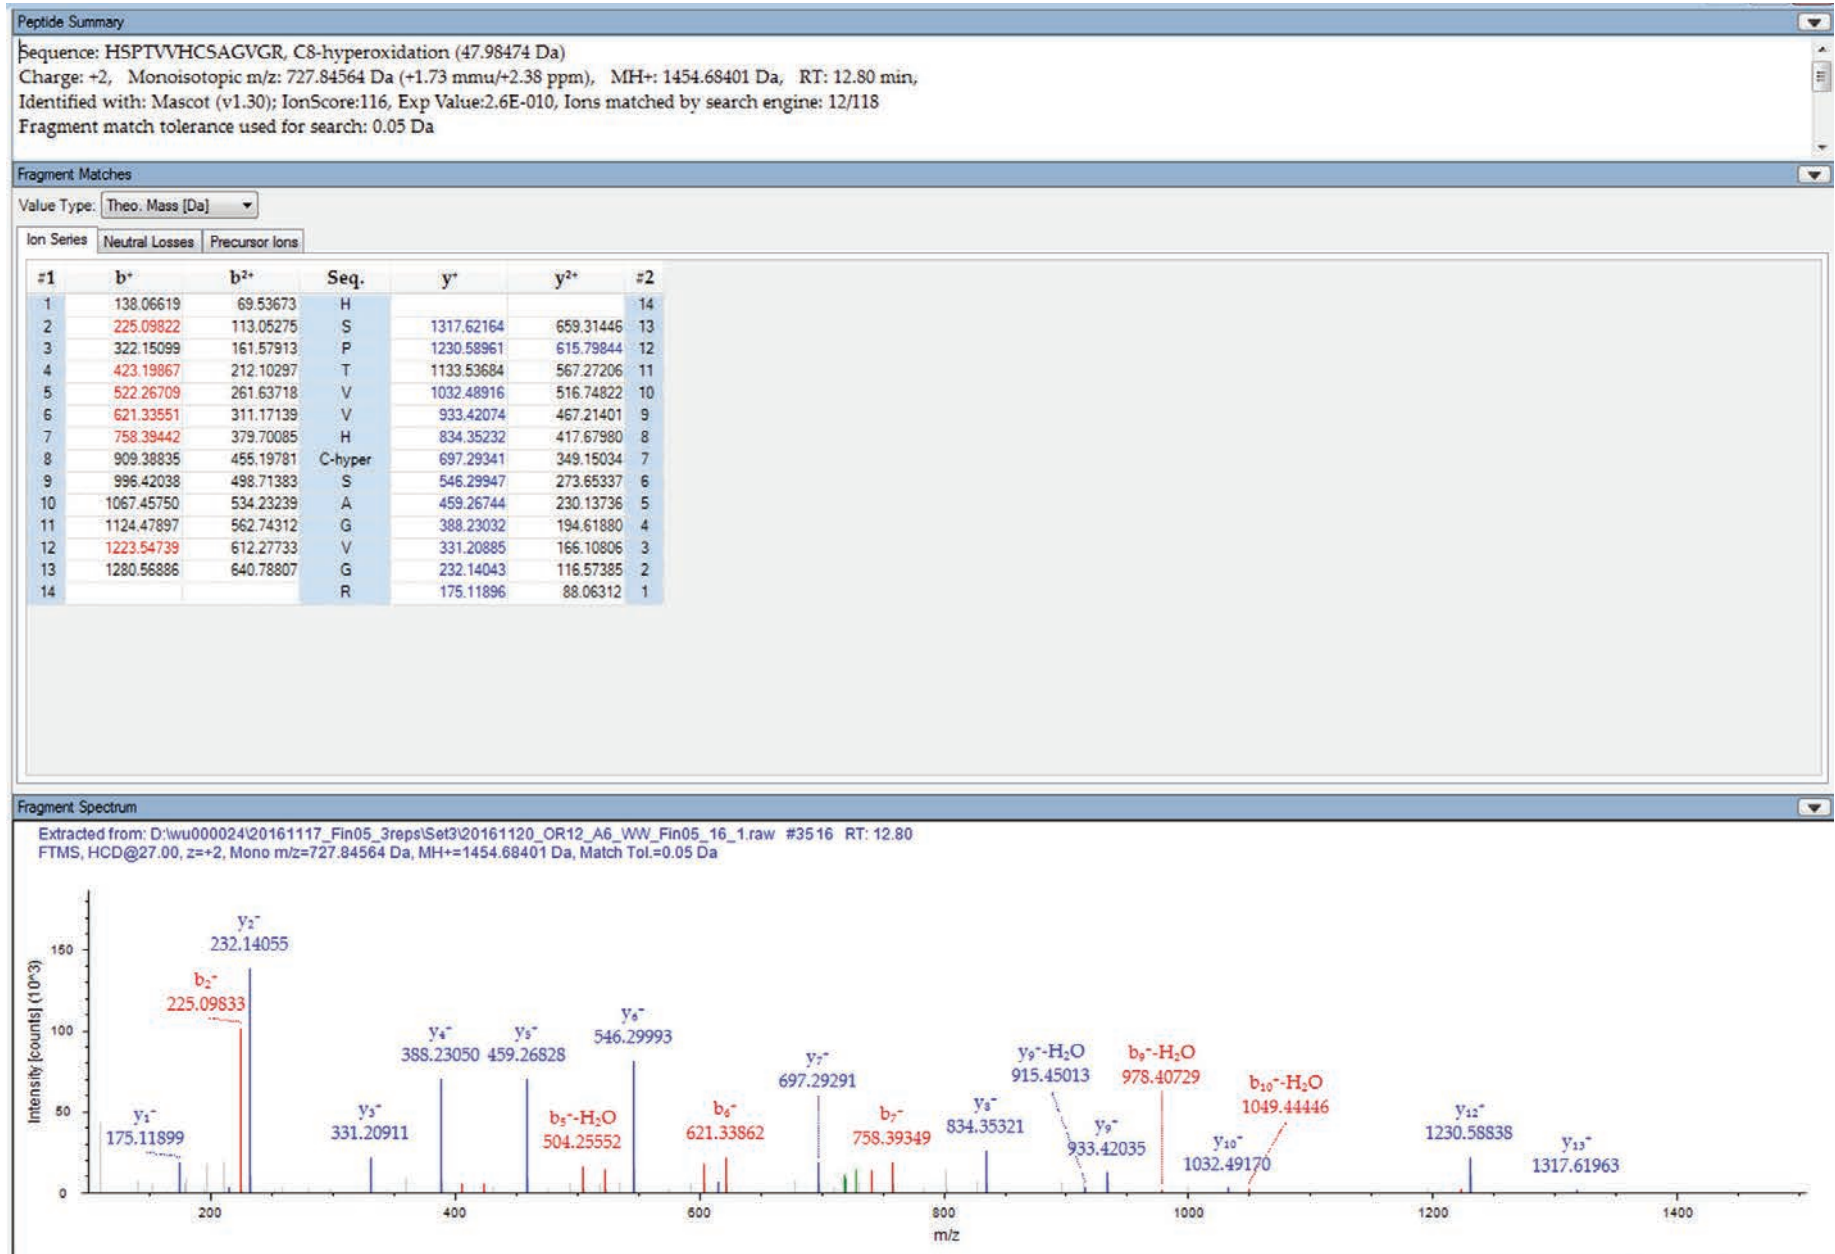



| Uniprot Accession | Description                        | Gene name | PTP type | Sequence                       | Hyperoxidised cysteine | Total MS/MS count |
|-------------------|------------------------------------|-----------|----------|--------------------------------|------------------------|-------------------|
| X1WF45            | Uncharacterized protein (Fragment) | ptprjb.2  | Receptor | EHMNQYScTSPTV <b>VHcSAGVGR</b> | C16(hyper)             | 6                 |

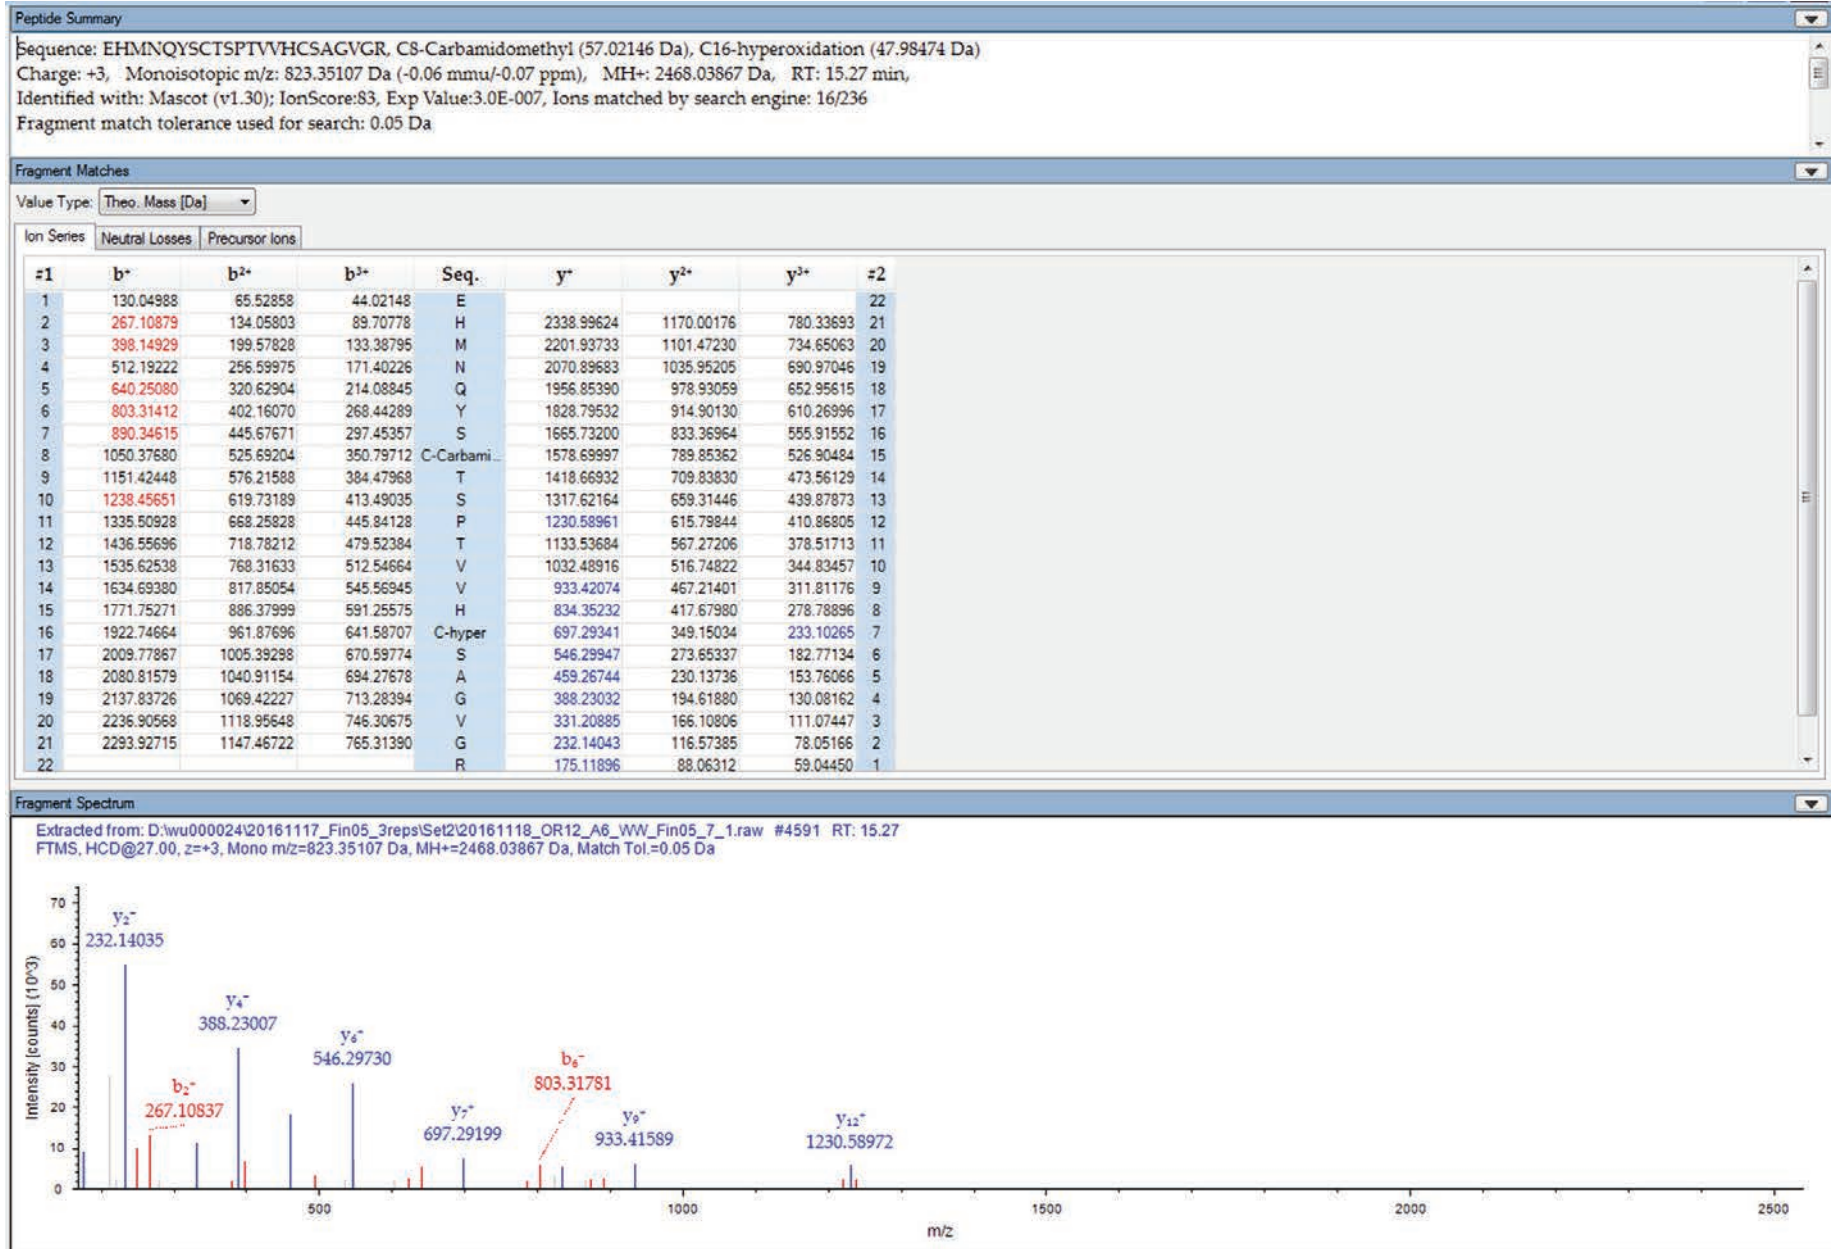



| Uniprot Accession | Description             | Gene name | PTP type | Sequence                     | Hyperoxidised cysteine | Total MS/MS count |
|-------------------|-------------------------|-----------|----------|------------------------------|------------------------|-------------------|
| X1WD65            | Uncharacterized protein | ptprk     | Receptor | MSNPPTAGPIV <b>VHcSAGAGR</b> | C14(hyper)             | 90                |

#### Peptide Summary

Sequence: MSNPPTAGPIVVHCSAGAGR, C14-hyperoxidation (47.98474 Da)  
 Charge: +2, Monoisotopic m/z: 985.46545 Da (+0.83 mmu/+0.85 ppm), MH+: 1969.92363 Da, RT: 17.46 min,  
 Identified with: Mascot (v1.30); IonScore:124, Exp Value:5.1E-011, Ions matched by search engine: 16/212  
 Fragment match tolerance used for search: 0.05 Da

#### Fragment Matches

Value Type: Theo. Mass [Da]

Ion Series: Neutral Losses Precursor Ions

| #1 | b <sup>+</sup> | b <sup>2+</sup> | Seq.    | y <sup>+</sup> | y <sup>2+</sup> | #2 |
|----|----------------|-----------------|---------|----------------|-----------------|----|
| 1  | 132.04778      | 66.52753        | M       |                |                 | 20 |
| 2  | 219.07981      | 110.04354       | S       | 1838.88147     | 919.94437       | 19 |
| 3  | 333.12274      | 167.06501       | N       | 1751.84944     | 876.42836       | 18 |
| 4  | 430.17551      | 215.59139       | P       | 1637.80651     | 819.40689       | 17 |
| 5  | 527.22828      | 264.11778       | P       | 1540.75374     | 770.88051       | 16 |
| 6  | 628.27596      | 314.64162       | T       | 1443.70097     | 722.35412       | 15 |
| 7  | 699.31308      | 350.16018       | A       | 1342.65329     | 671.83028       | 14 |
| 8  | 756.33455      | 378.67091       | G       | 1271.61617     | 636.31172       | 13 |
| 9  | 853.38732      | 427.19730       | P       | 1214.59470     | 607.80099       | 12 |
| 10 | 966.47139      | 483.73933       | I       | 1117.54193     | 559.27460       | 11 |
| 11 | 1065.53981     | 533.27354       | V       | 1004.45786     | 502.73257       | 10 |
| 12 | 1164.60823     | 582.80775       | V       | 905.38944      | 453.19836       | 9  |
| 13 | 1301.66714     | 651.33721       | H       | 806.32102      | 403.66415       | 8  |
| 14 | 1452.66107     | 726.83417       | C-hyper | 669.26211      | 335.13469       | 7  |
| 15 | 1539.69310     | 770.35019       | S       | 518.26817      | 259.63772       | 6  |
| 16 | 1610.73022     | 805.86875       | A       | 431.23614      | 216.12171       | 5  |
| 17 | 1667.75169     | 834.37948       | G       | 360.19902      | 180.60315       | 4  |
| 18 | 1738.78881     | 869.89804       | A       | 303.17755      | 152.09241       | 3  |
| 19 | 1795.81028     | 898.40878       | G       | 232.14043      | 116.57385       | 2  |
| 20 |                |                 | R       | 175.11896      | 88.06312        | 1  |

#### Fragment Spectrum

Extracted from: D:\wu000024\20161117\_Fin05\_3reps\Set1\20161117\_OR12\_A6\_WW\_Fin05\_1\_5\_raw #5230 RT: 17.46  
 FTMS, HCD@27.00, z=+2, Mono m/z=985.46545 Da, MH+=1969.92363 Da, Match Tol.=0.05 Da

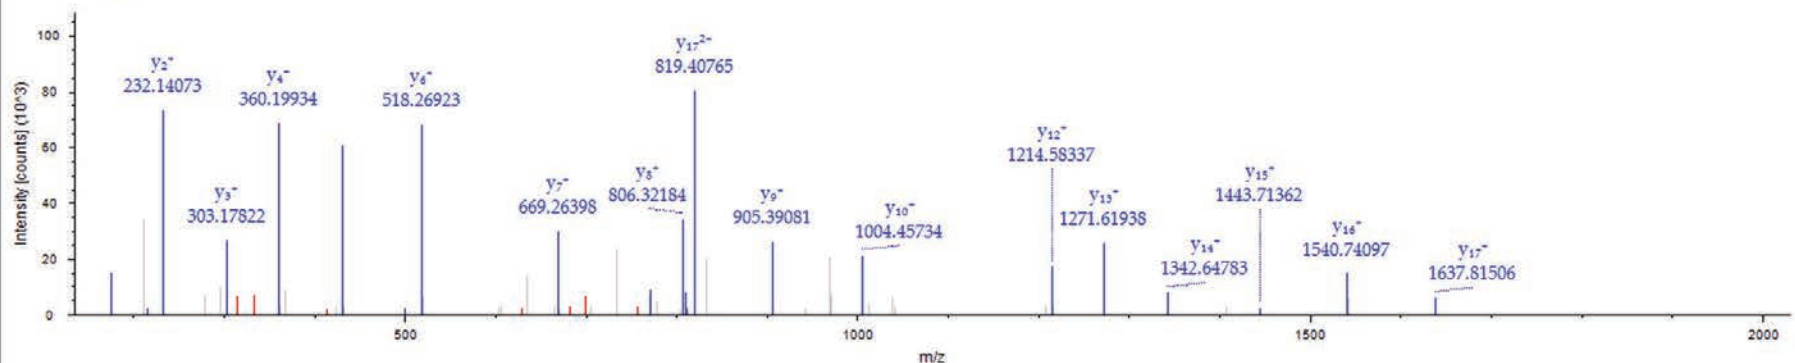

| Uniprot Accession | Description                        | Gene name | PTP type | Sequence              | Hyperoxidised cysteine | Total MS/MS count |
|-------------------|------------------------------------|-----------|----------|-----------------------|------------------------|-------------------|
| A0A0R4IA95        | Uncharacterized protein (Fragment) | ptpro     | Receptor | GPIV <b>VHCSAGVGR</b> | C7(hyper)              | 52                |

Peptide Summary  
 Sequence: GPIVVHCSAGVGR, C7-hydroxylation (47.98474 Da)  
 Charge: +2, Monoisotopic m/z: 650.32776 Da (+0.39 mmu/+0.6 ppm), MH+: 1299.64824 Da, RT: 15.37 min.  
 Identified with: Mascot (v1.30); IonScore:116, Exp Value:3.1E-010, Ions matched by search engine: 11/96  
 Fragment match tolerance used for search: 0.05 Da

Fragment Matches

Value Type: Theo. Mass [Da]

Ion Series: Neutral Losses | Precursor Ions

| #1 | b <sup>+</sup> | b <sup>2+</sup> | Seq.    | y <sup>+</sup> | y <sup>2+</sup> | #2 |
|----|----------------|-----------------|---------|----------------|-----------------|----|
| 1  | 58.02875       | 29.51801        | G       |                |                 | 13 |
| 2  | 155.08152      | 78.04440        | P       | 1242.62600     | 621.81664       | 12 |
| 3  | 268.16559      | 134.58643       | I       | 1145.57323     | 573.29025       | 11 |
| 4  | 367.23401      | 184.12064       | V       | 1032.48916     | 516.74822       | 10 |
| 5  | 466.30243      | 233.65485       | V       | 933.42074      | 467.21401       | 9  |
| 6  | 603.36134      | 302.18431       | H       | 834.35232      | 417.67980       | 8  |
| 7  | 754.35527      | 377.68127       | C-hyper | 697.29341      | 349.15034       | 7  |
| 8  | 841.38730      | 421.19729       | S       | 546.29947      | 273.65337       | 6  |
| 9  | 912.42442      | 456.71585       | A       | 459.26744      | 230.13736       | 5  |
| 10 | 969.44589      | 485.22658       | G       | 388.23032      | 194.61880       | 4  |
| 11 | 1068.51431     | 534.76079       | V       | 331.20885      | 166.10806       | 3  |
| 12 | 1125.53578     | 563.27153       | G       | 232.14043      | 116.57385       | 2  |
| 13 |                |                 | R       | 175.11896      | 88.06312        | 1  |

Fragment Spectrum

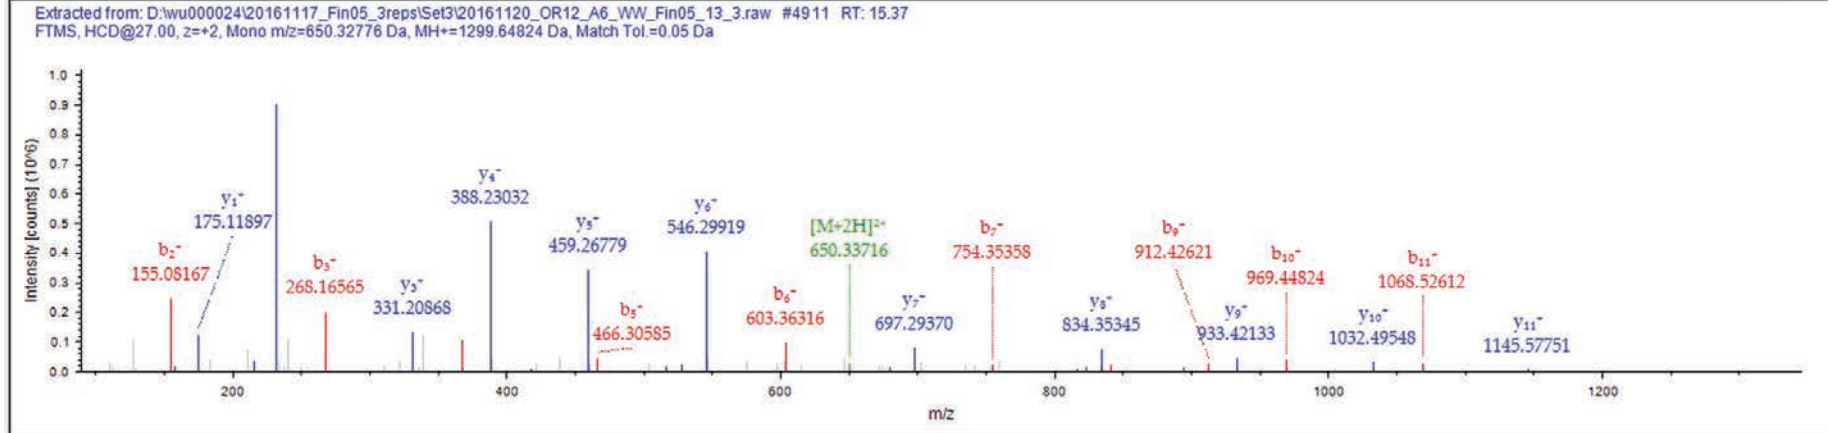

| Uniprot Accession | Description                                            | Gene name | PTP type | Sequence                    | Hyperoxidised cysteine | Total MS/MS count |
|-------------------|--------------------------------------------------------|-----------|----------|-----------------------------|------------------------|-------------------|
| Q90YJ4_site1      | Receptor protein-tyrosine phosphatase sigma (Fragment) | ptprsa    | Receptor | EQFGQDGPIS <b>VHcSAGVGR</b> | C13(hyper)             | 21                |

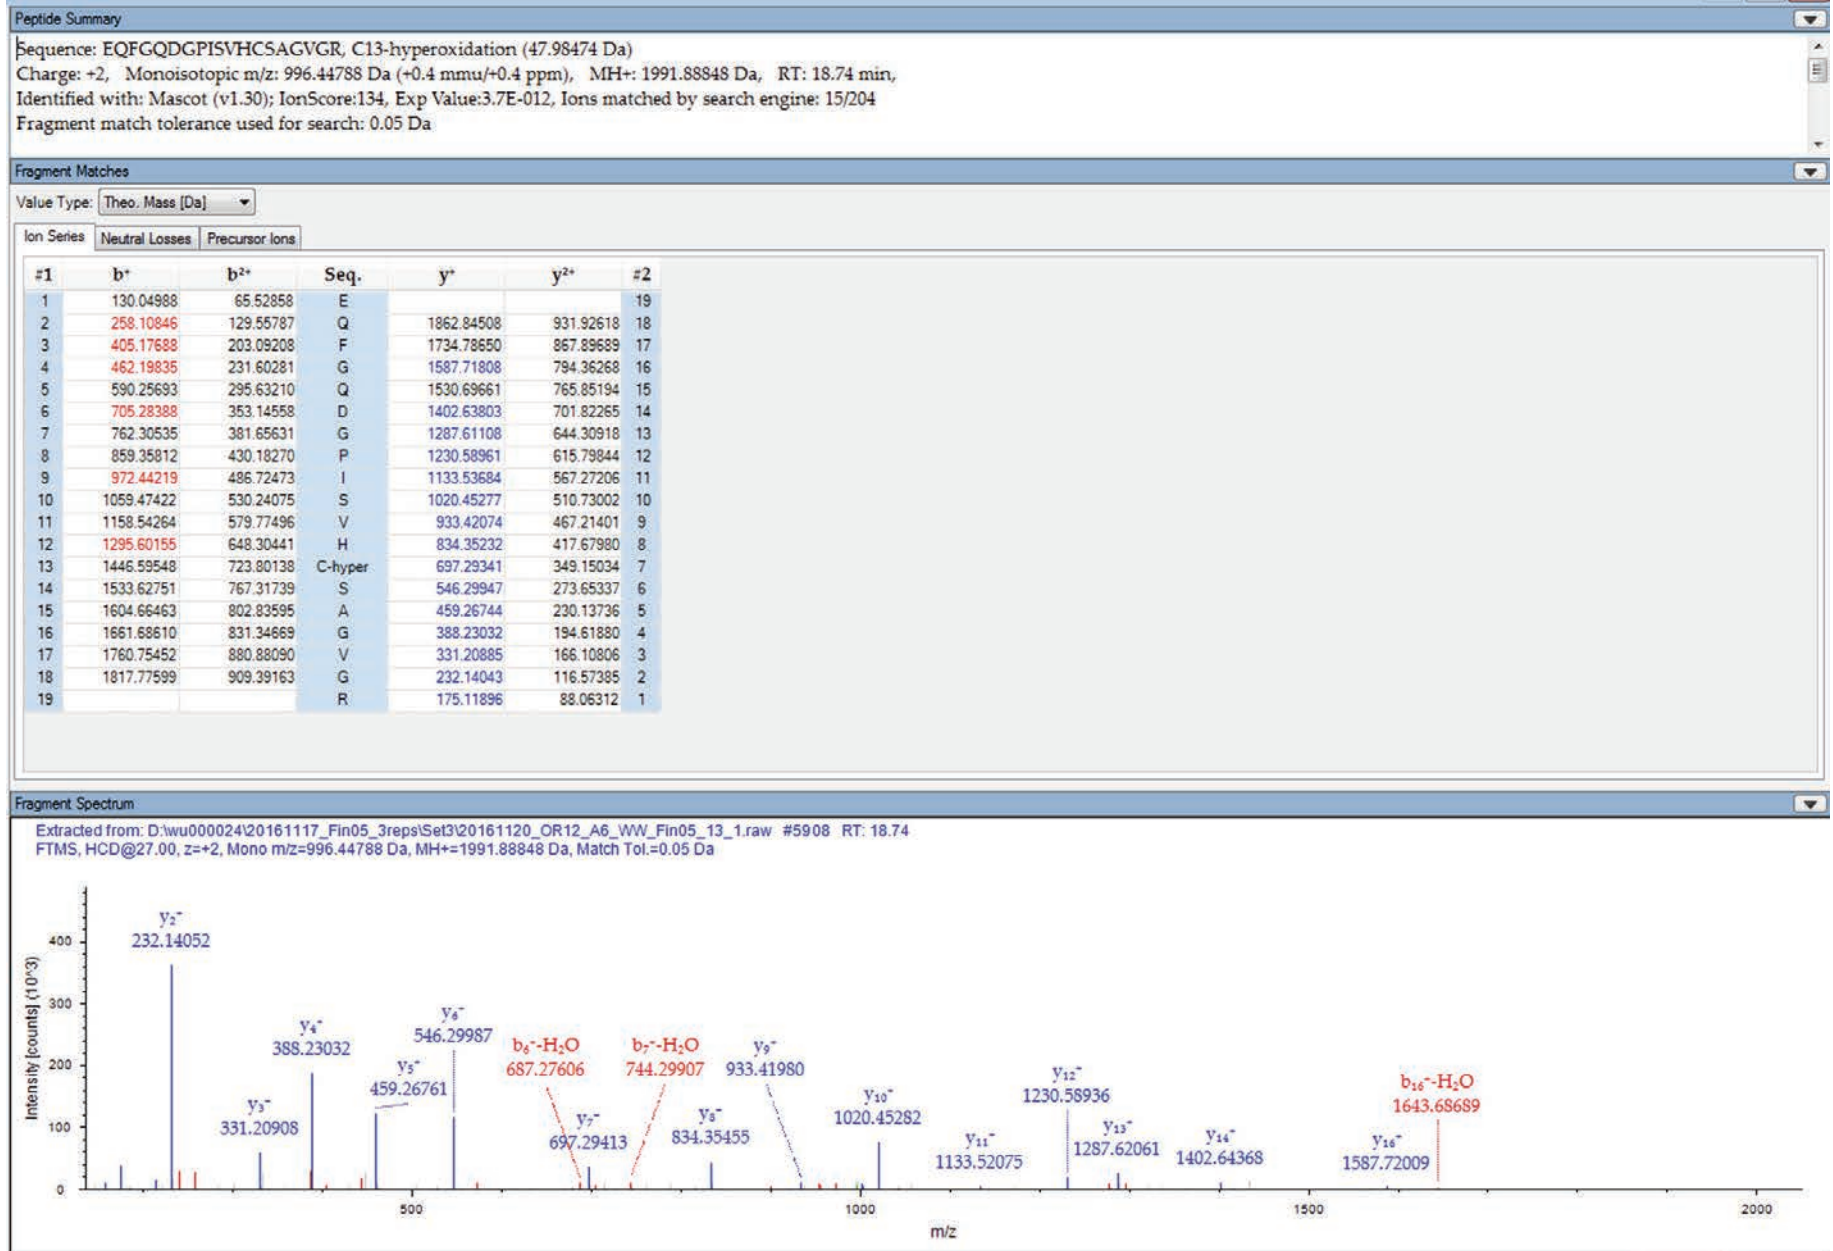

| Uniprot Accession | Description                                            | Gene name | PTP type | Sequence             | Hyperoxidised cysteine | Total MS/MS count |
|-------------------|--------------------------------------------------------|-----------|----------|----------------------|------------------------|-------------------|
| Q90YJ4_site2      | Receptor protein-tyrosine phosphatase sigma (Fragment) | ptprsa    | Receptor | TcNPPDAGPIIAHcSAGVGR | C14(hyper)             | 45                |

Peptide Summary  
 Sequence: TCNPPDAGPIIAHcSAGVGR, C2-Carbamidomethyl (57.02146 Da), C14-hyperoxidation (47.98474 Da)  
 Charge: +2, Monoisotopic m/z: 1020.96613 Da (+1.14 mmu/+1.12 ppm), MH+: 2040.92497 Da, RT: 17.33 min,  
 Identified with: Mascot (v1.30); IonScore:123, Exp Value:6.1E-011, Ions matched by search engine: 15/214  
 Fragment match tolerance used for search: 0.05 Da

Fragment Matches

Value Type: Theo. Mass [Da]

| #1 | b <sup>+</sup> | b <sup>2+</sup> | Seq.         | y <sup>+</sup> | y <sup>2+</sup> | #2 |
|----|----------------|-----------------|--------------|----------------|-----------------|----|
| 1  | 102.05496      | 51.53112        | T            |                |                 | 20 |
| 2  | 262.08561      | 131.54644       | C-Carbami... | 1939.87501     | 970.44114       | 19 |
| 3  | 376.12854      | 188.56791       | N            | 1779.84436     | 890.42582       | 18 |
| 4  | 473.18131      | 237.09429       | P            | 1665.80143     | 833.40435       | 17 |
| 5  | 570.23408      | 285.62068       | P            | 1568.74866     | 784.87797       | 16 |
| 6  | 685.26103      | 343.13415       | D            | 1471.69589     | 736.35158       | 15 |
| 7  | 756.29815      | 378.65271       | A            | 1356.66894     | 678.83811       | 14 |
| 8  | 813.31962      | 407.16345       | G            | 1285.63182     | 643.31955       | 13 |
| 9  | 910.37239      | 455.68983       | P            | 1228.61035     | 614.80881       | 12 |
| 10 | 1023.45646     | 512.23187       | I            | 1131.55758     | 566.28243       | 11 |
| 11 | 1136.54053     | 568.77390       | I            | 1018.47351     | 509.74039       | 10 |
| 12 | 1207.57765     | 604.29246       | A            | 905.38944      | 453.19836       | 9  |
| 13 | 1344.63656     | 672.82192       | H            | 834.35232      | 417.67980       | 8  |
| 14 | 1495.63049     | 748.31889       | C-hyper      | 697.29341      | 349.15034       | 7  |
| 15 | 1582.66252     | 791.83490       | S            | 546.29947      | 273.65337       | 6  |
| 16 | 1653.69964     | 827.35346       | A            | 459.26744      | 230.13736       | 5  |
| 17 | 1710.72111     | 855.86420       | G            | 388.23032      | 194.61880       | 4  |
| 18 | 1809.78953     | 905.39841       | V            | 331.20885      | 166.10806       | 3  |
| 19 | 1866.81100     | 933.90914       | G            | 232.14043      | 116.57385       | 2  |
| 20 |                |                 | R            | 175.11896      | 88.06312        | 1  |

Fragment Spectrum

Extracted from: D:\wu000024\20161117\_Fin05\_3reps\Set3\20161120\_OR12\_A6\_VW\_Fin05\_16\_1.raw #5147 RT: 17.33  
 FTMS, HCD@27.00, z=+2, Mono m/z=1020.96613 Da, MH+=2040.92497 Da, Match Tol.=0.05 Da

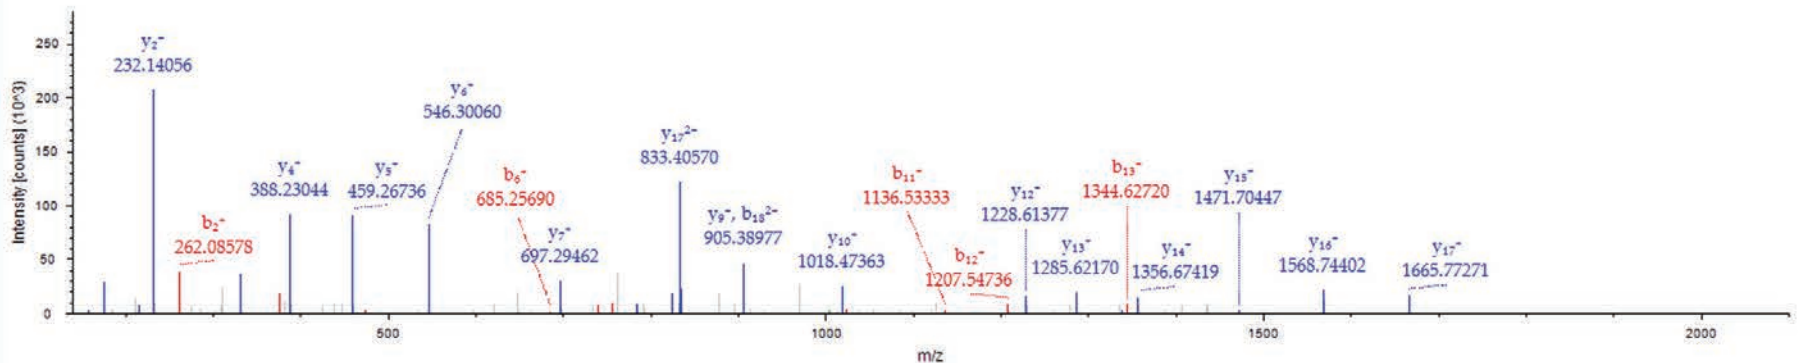



| Uniprot Accession   | Description             | Gene name | PTP type | Sequence                     | Hyperoxidised cysteine | Total MS/MS count |
|---------------------|-------------------------|-----------|----------|------------------------------|------------------------|-------------------|
| A0A0R4ITF5 (C7U125) | Uncharacterized protein | ptprub    | Receptor | TSTPLDAGPVV <b>VHcSVGAGR</b> | C14(hyper)             | 13                |

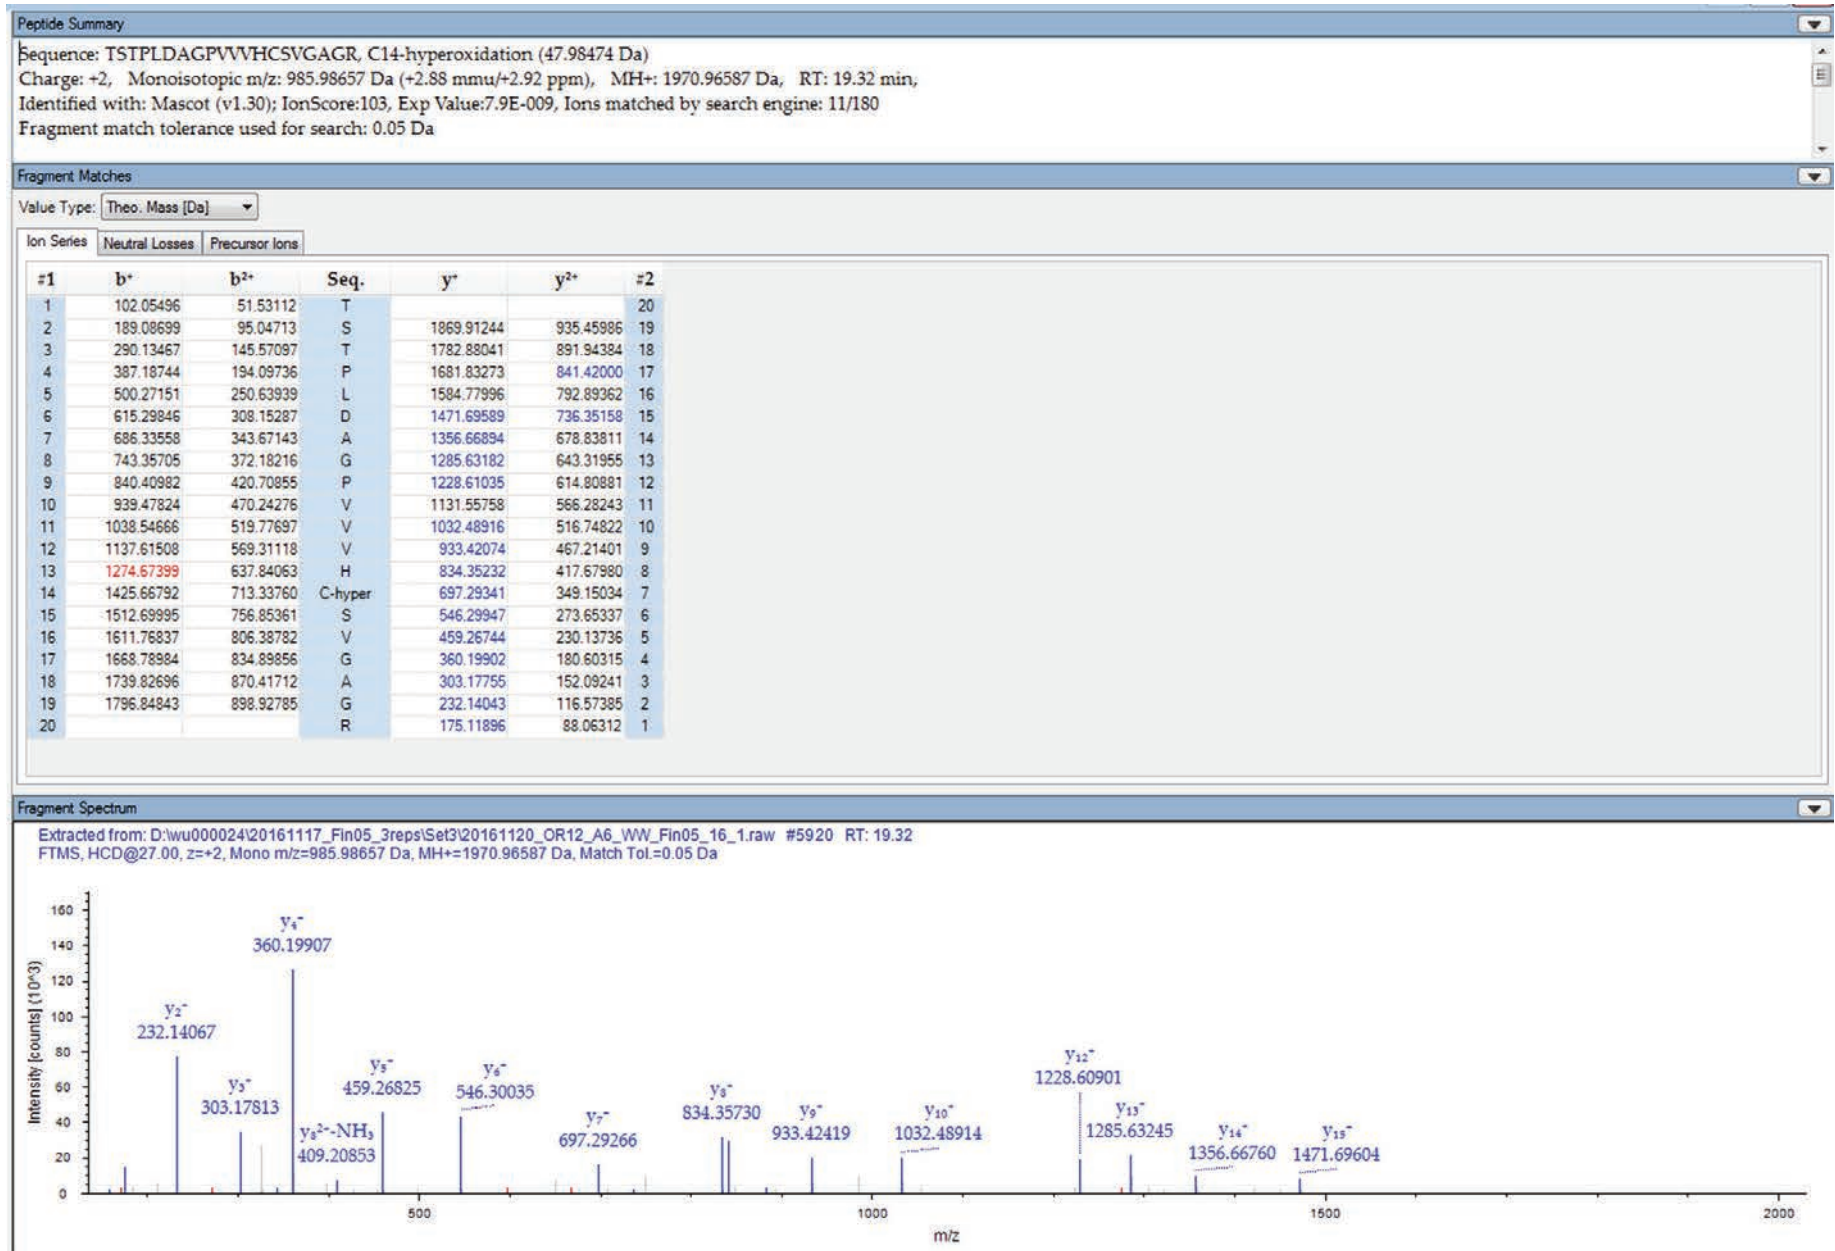

| Uniprot Accession | Description                        | Gene name | PTP type | Sequence                    | Hyperoxidised cysteine | Total MS/MS count |
|-------------------|------------------------------------|-----------|----------|-----------------------------|------------------------|-------------------|
| X1WET2            | Uncharacterized protein (Fragment) | ptprz1a   | Receptor | AQTDGMGPMV <b>VHcSAGVGR</b> | C13(hyper)             | 16                |

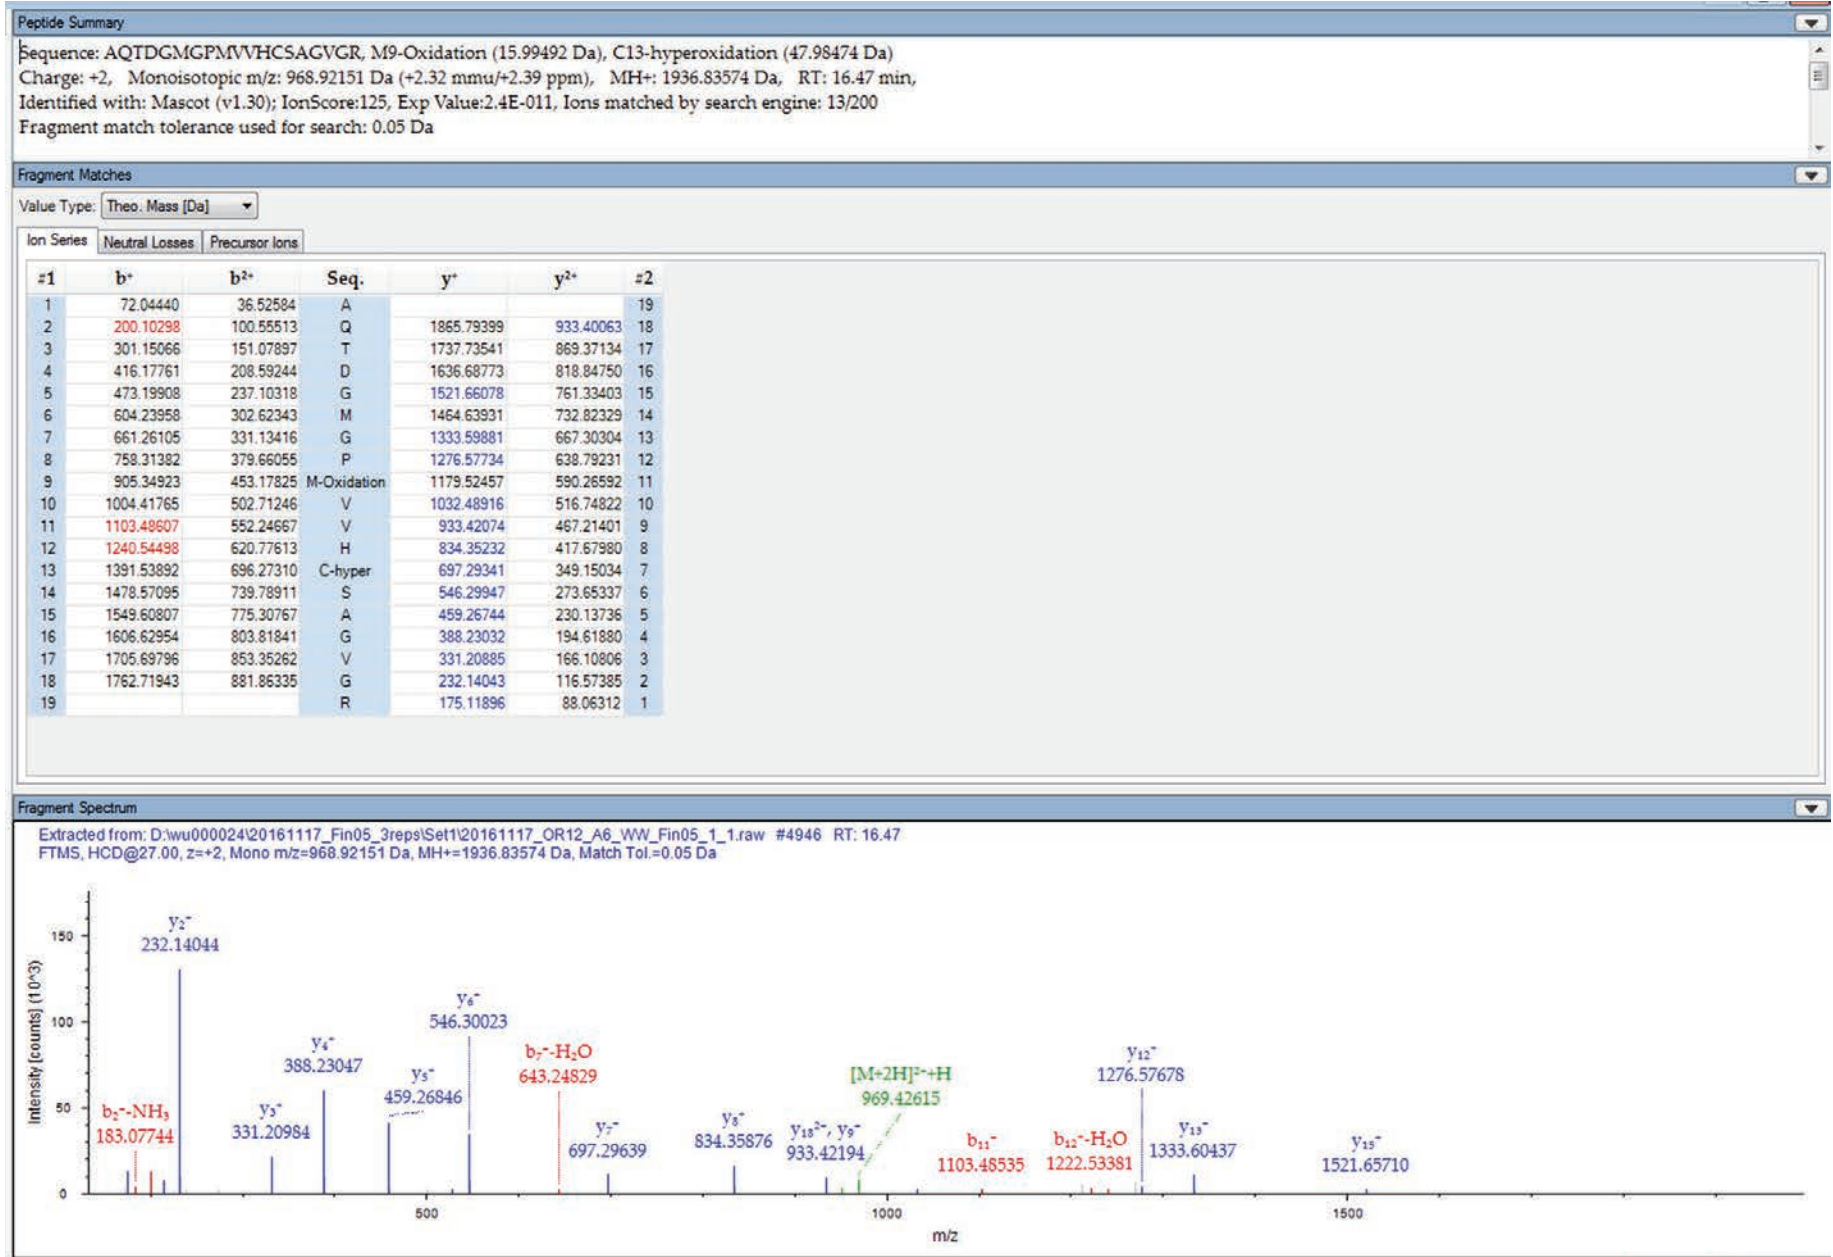

| Uniprot Accession | Description             | Gene name | PTP type | Sequence          | Hyperoxidised cysteine | Total MS/MS count |
|-------------------|-------------------------|-----------|----------|-------------------|------------------------|-------------------|
| B8A5J4            | Uncharacterized protein | ptprz1b   | Receptor | TAEMGPVVVHcSAGVGR | C11(hyper)             | 104               |

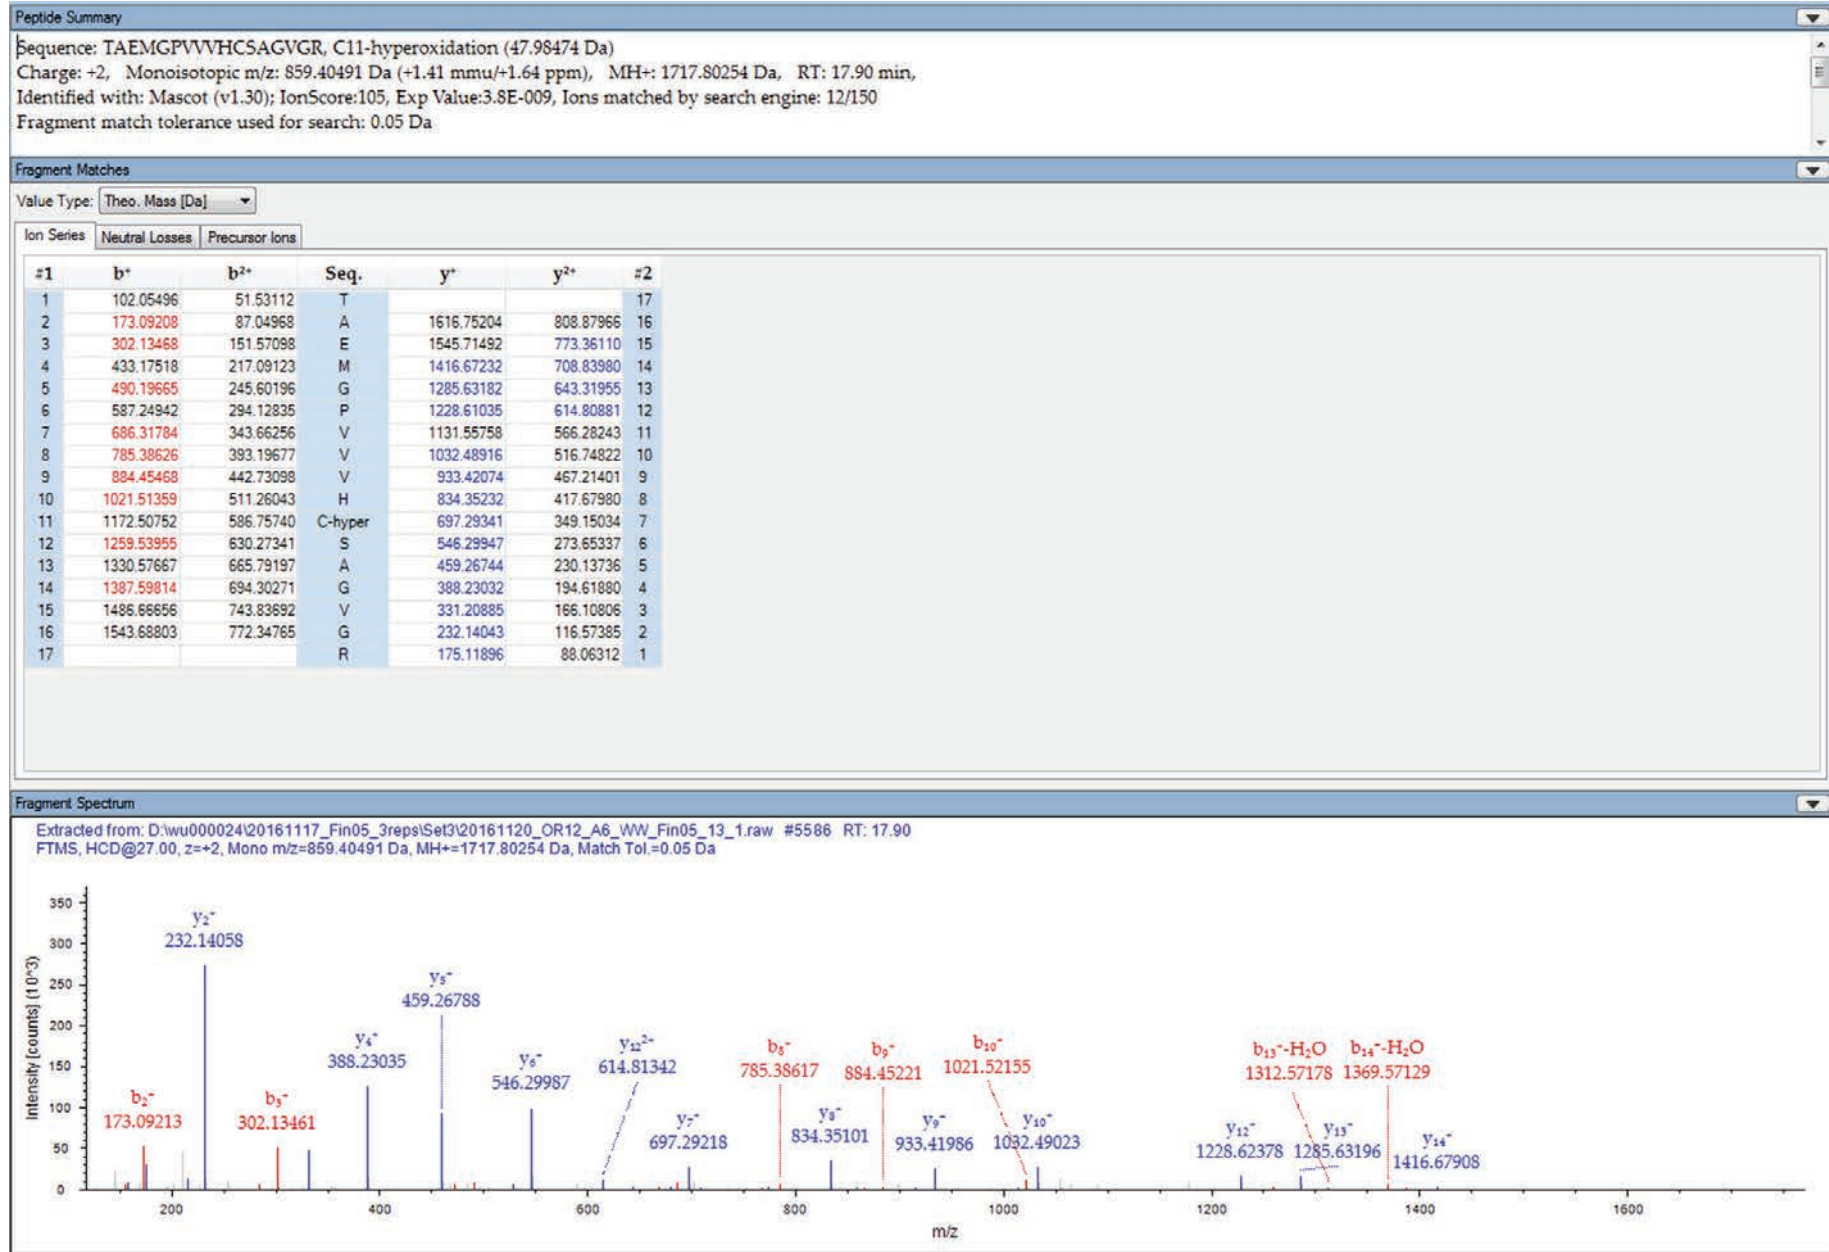

| Uniprot Accession | Description                                | Gene name | PTP type     | Sequence                       | Hyperoxidised cysteine | Total MS/MS count |
|-------------------|--------------------------------------------|-----------|--------------|--------------------------------|------------------------|-------------------|
| C7U142            | Protein-tyrosine phosphatase 1B (Fragment) | ptpn1     | Non-receptor | ESGcLSPELGPVV <b>VHcSAGIGR</b> | C16(hyper)             | 142               |

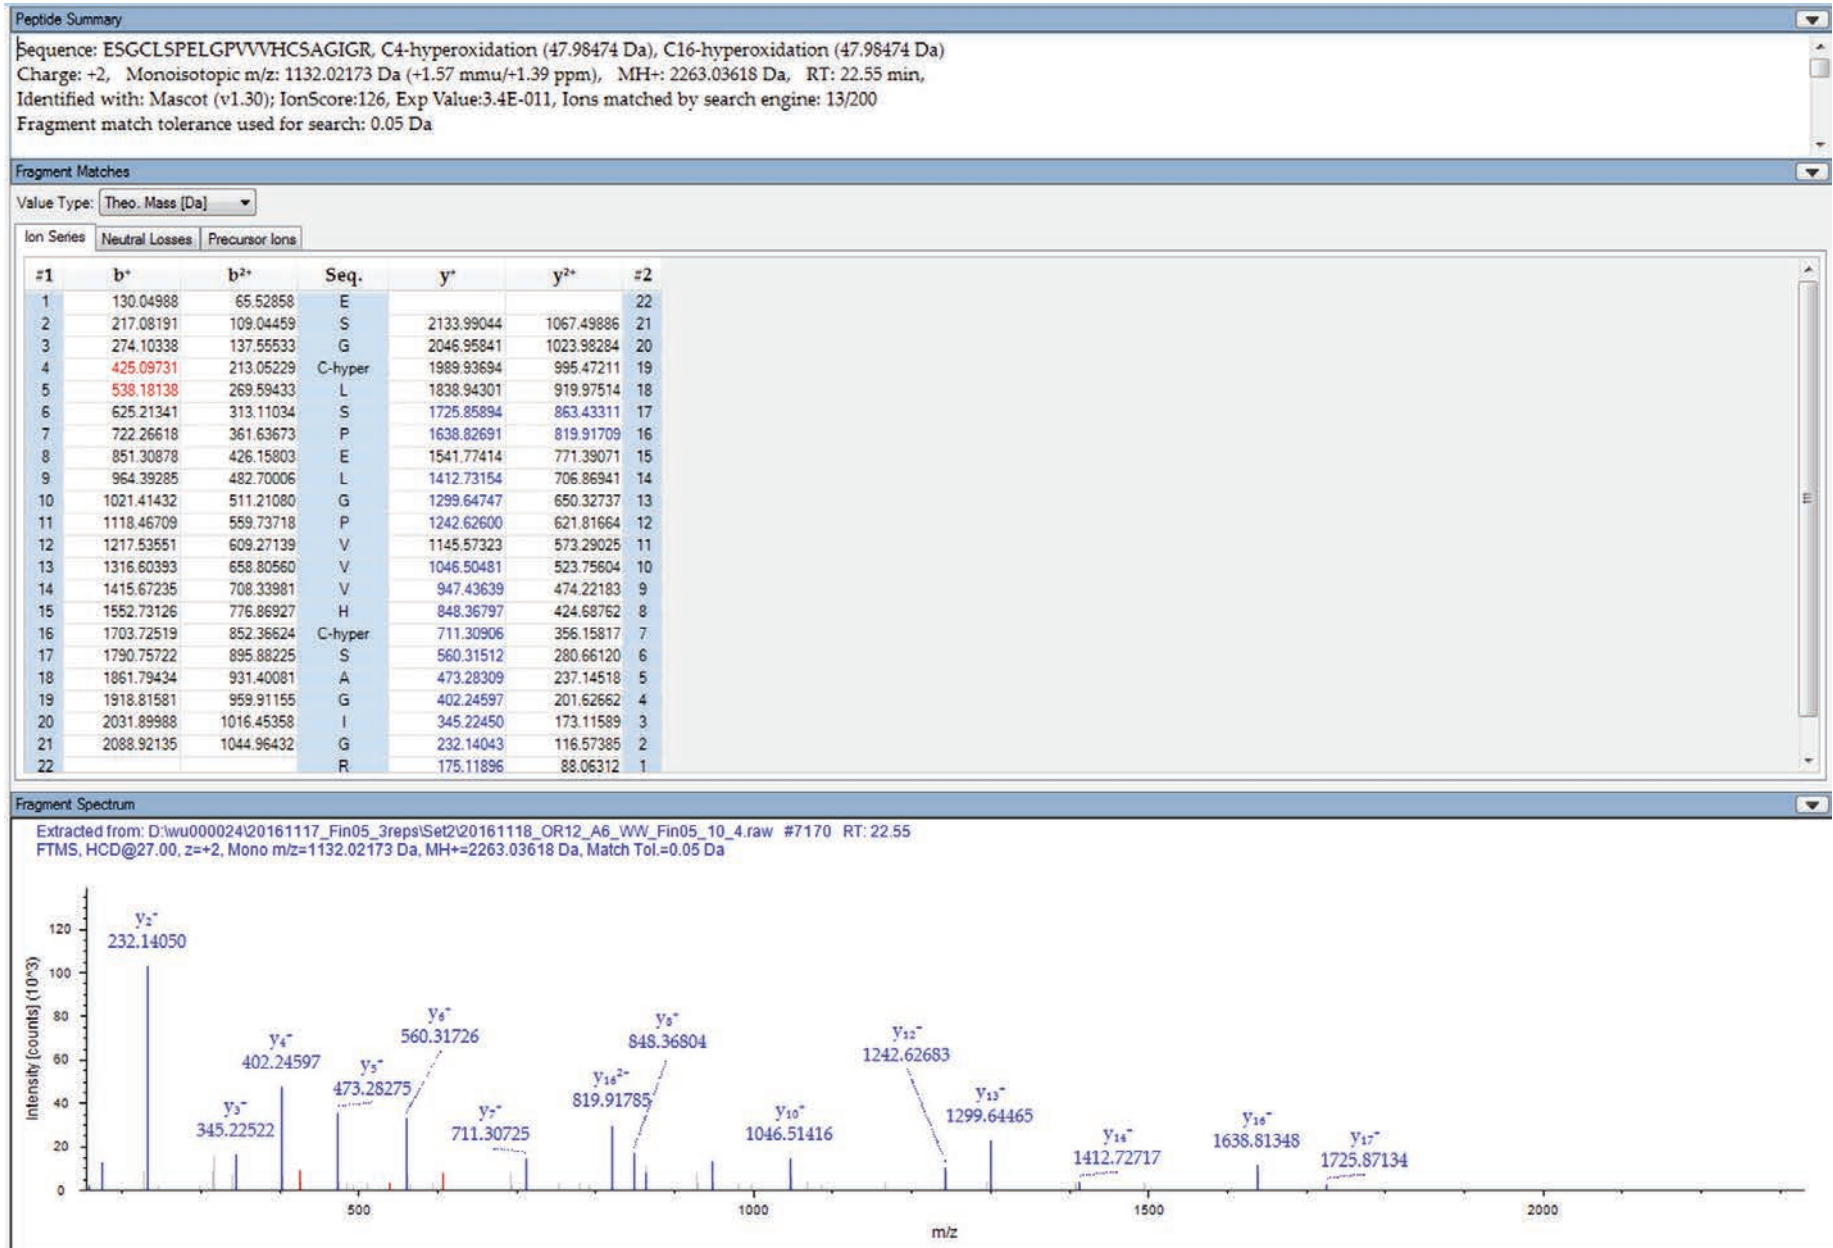



| Uniprot Accession | Description                                    | Gene name | PTP type     | Sequence                     | Hyperoxidised cysteine | Total MS/MS count |
|-------------------|------------------------------------------------|-----------|--------------|------------------------------|------------------------|-------------------|
| C7U151            | Protein-tyrosine phosphatase SHP-2a (Fragment) | ptpn11a   | Non-receptor | QEGITGAGPIV <b>VHcSAGIGR</b> | C14(hyper)             | 112               |

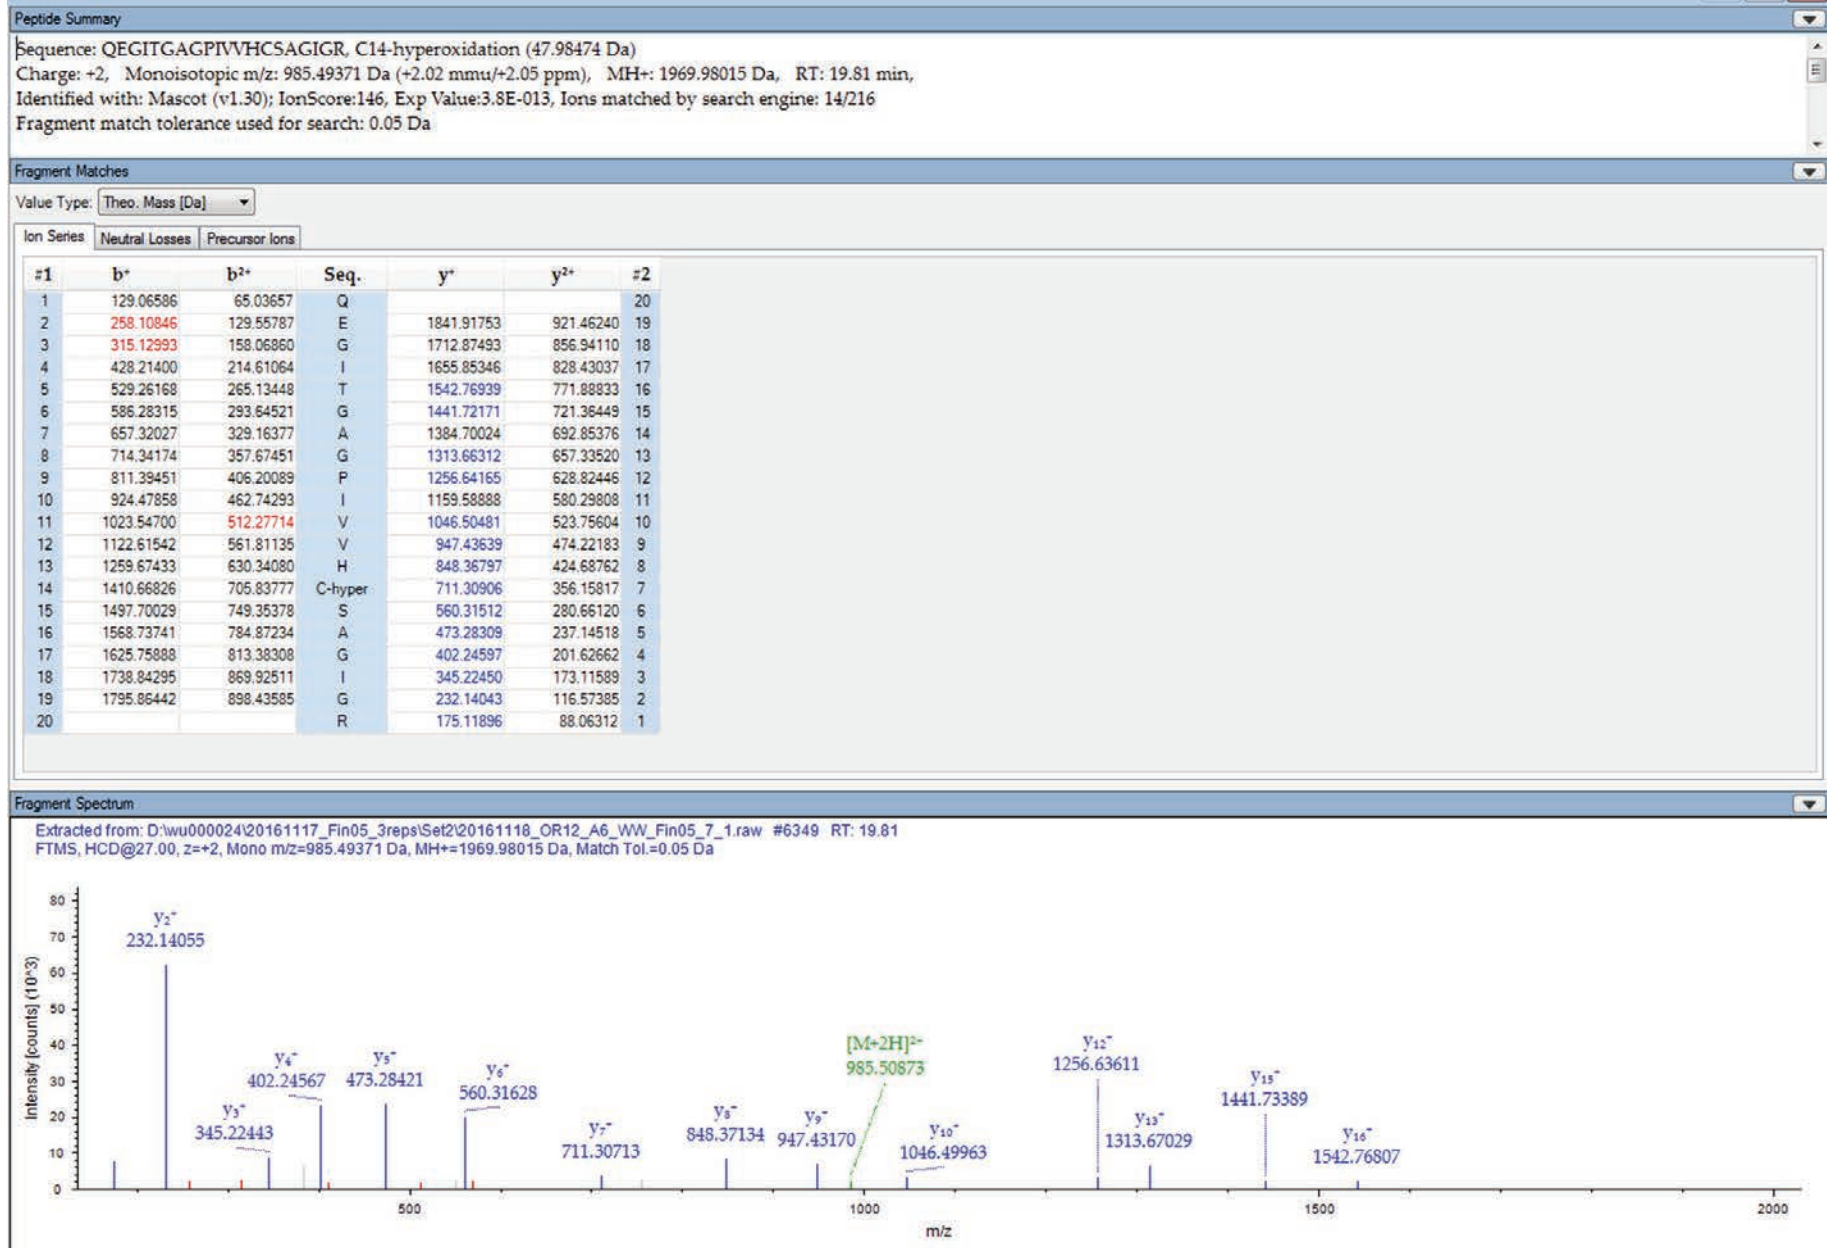

| Uniprot Accession | Description                                    | Gene name | PTP type     | Sequence                      | Hyperoxidised cysteine | Total MS/MS count |
|-------------------|------------------------------------------------|-----------|--------------|-------------------------------|------------------------|-------------------|
| C7U120            | Protein-tyrosine phosphatase SHP-2b (Fragment) | ptpn11b   | Non-receptor | TQSAIPESGPIV <b>VHcSAGIGR</b> | C15(hyper)             | 59                |

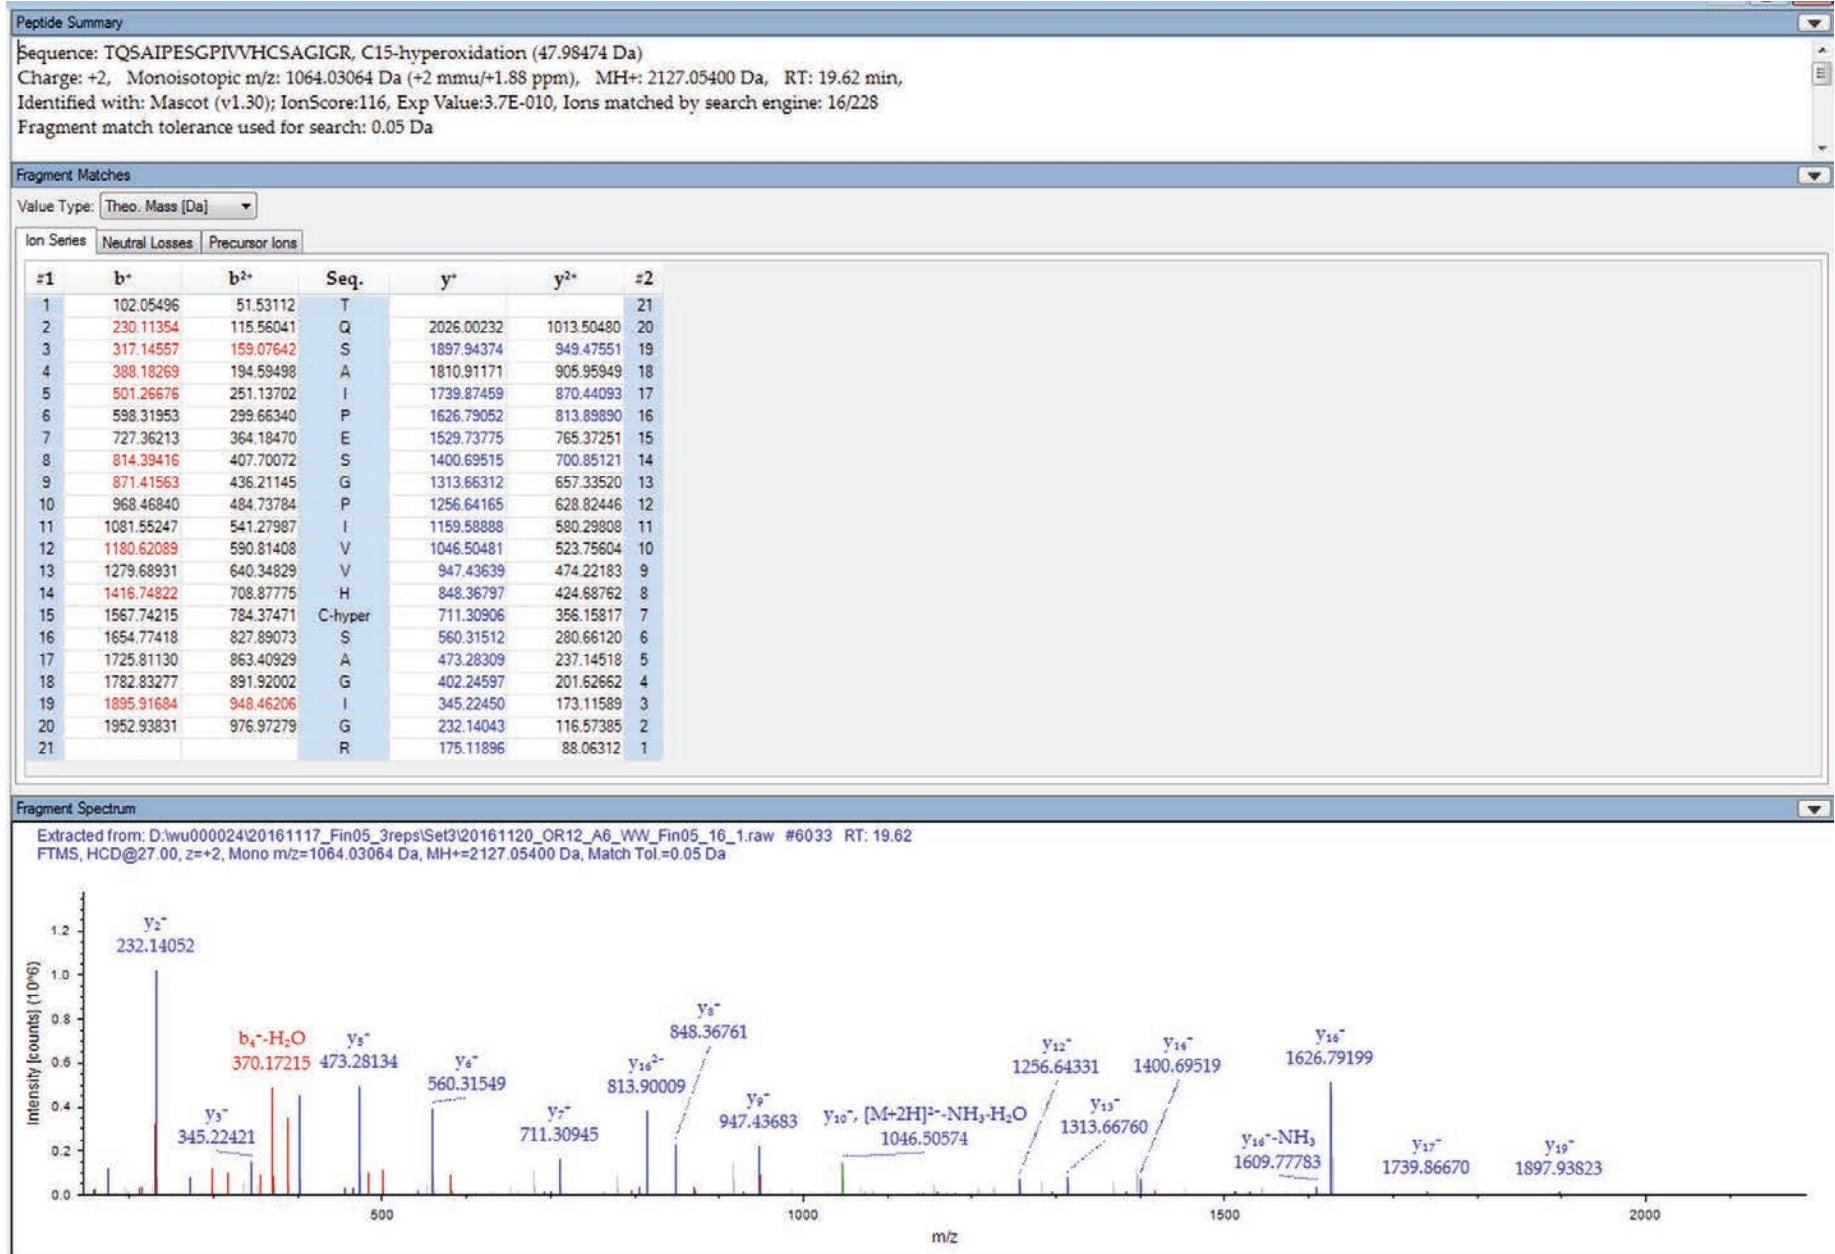

| Uniprot Accession | Description                                        | Gene name | PTP type     | Sequence        | Hyperoxidised cysteine | Total MS/MS count |
|-------------------|----------------------------------------------------|-----------|--------------|-----------------|------------------------|-------------------|
| Q6PEI4            | Protein tyrosine phosphatase, non-receptor type 12 | ptpn12    | Non-receptor | DTTPICVHcSAGcGR | C13(hyper)             | 71                |

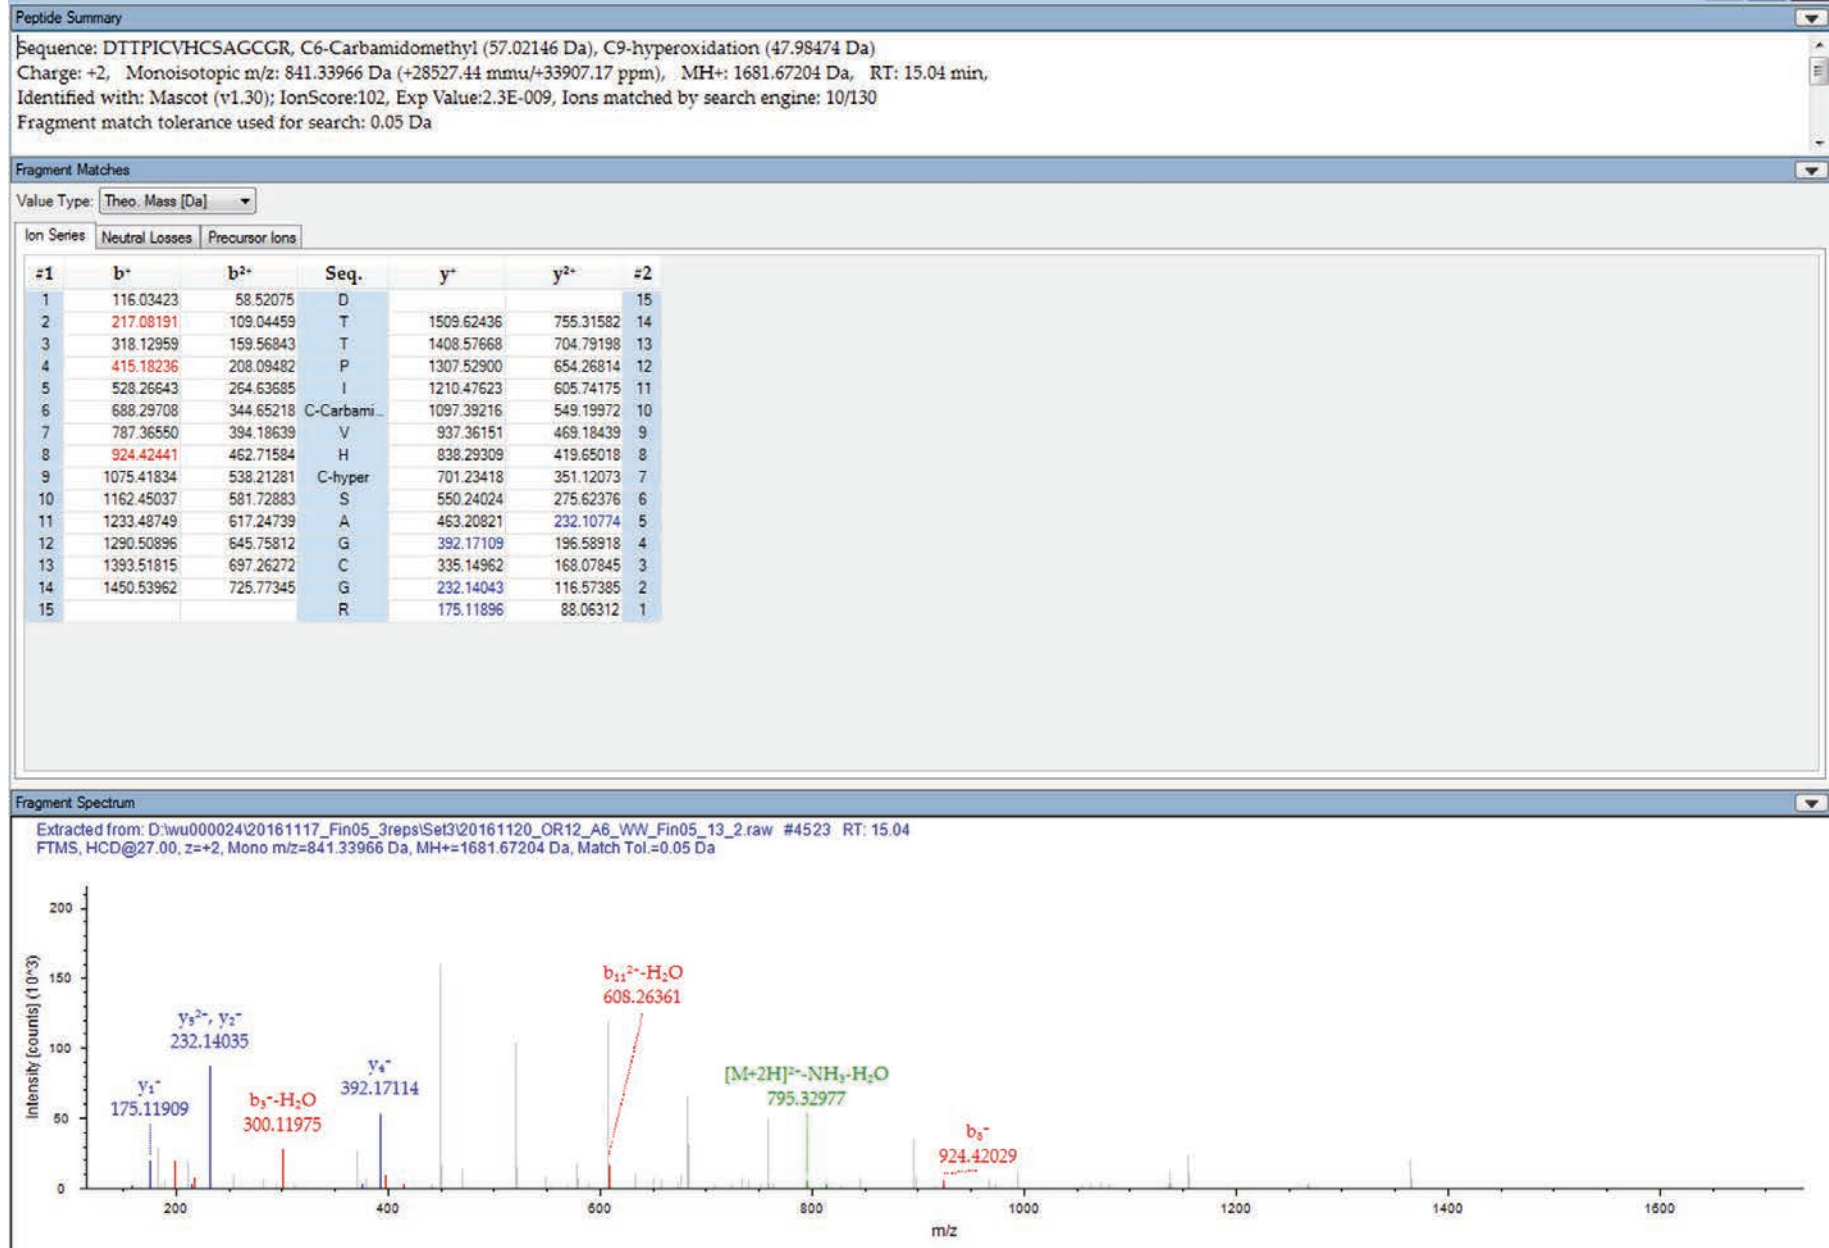

| Uniprot Accession | Description                                 | Gene name | PTP type     | Sequence           | Hyperoxidised cysteine | Total MS/MS count |
|-------------------|---------------------------------------------|-----------|--------------|--------------------|------------------------|-------------------|
| C7U124            | Protein-tyrosine phosphatase BAS (Fragment) | ptpn13    | Non-receptor | HIHLSGPIITHCSAGIGR | C12(hyper)             | 64                |

Peptide Summary  
 Sequence: HIHLSGPIITHCSAGIGR, C12-hydroxylation (47.98474 Da)  
 Charge: +2, Monoisotopic m/z: 958.99292 Da (+1.27 mmu/+1.33 ppm), MH+: 1916.97856 Da, RT: 18.52 min,  
 Identified with: Mascot (v1.30); IonScore:111, Exp Value:1.0E-009, Ions matched by search engine: 13/152  
 Fragment match tolerance used for search: 0.05 Da

Fragment Matches  
 Value Type: Theo. Mass [Da]

Ion Series: Neutral Losses | Precursor Ions

| #1 | b <sup>+</sup> | b <sup>2+</sup> | Seq.    | y <sup>+</sup> | y <sup>2+</sup> | #2 |
|----|----------------|-----------------|---------|----------------|-----------------|----|
| 1  | 138.06619      | 69.53673        | H       |                |                 | 18 |
| 2  | 251.15026      | 126.07877       | I       | 1779.91711     | 890.46219       | 17 |
| 3  | 388.20917      | 194.60822       | H       | 1666.83304     | 833.92016       | 16 |
| 4  | 501.29324      | 251.15026       | L       | 1529.77413     | 765.39070       | 15 |
| 5  | 588.32527      | 294.66627       | S       | 1416.69006     | 708.84867       | 14 |
| 6  | 645.34674      | 323.17701       | G       | 1329.65803     | 665.33265       | 13 |
| 7  | 742.39951      | 371.70339       | P       | 1272.63656     | 636.82192       | 12 |
| 8  | 855.48358      | 428.24543       | I       | 1175.58379     | 588.29553       | 11 |
| 9  | 968.56765      | 484.78746       | I       | 1062.49972     | 531.75350       | 10 |
| 10 | 1069.61533     | 535.31130       | T       | 949.41565      | 475.21146       | 9  |
| 11 | 1206.67424     | 603.84076       | H       | 848.36797      | 424.68762       | 8  |
| 12 | 1357.66817     | 679.33772       | C-hyper | 711.30906      | 356.15817       | 7  |
| 13 | 1444.70020     | 722.85374       | S       | 560.31512      | 280.66120       | 6  |
| 14 | 1515.73732     | 758.37230       | A       | 473.28309      | 237.14518       | 5  |
| 15 | 1572.75879     | 786.88303       | G       | 402.24597      | 201.62662       | 4  |
| 16 | 1685.84286     | 843.42507       | I       | 345.22450      | 173.11589       | 3  |
| 17 | 1742.86433     | 871.93580       | G       | 232.14043      | 116.57385       | 2  |
| 18 |                |                 | R       | 175.11896      | 88.06312        | 1  |

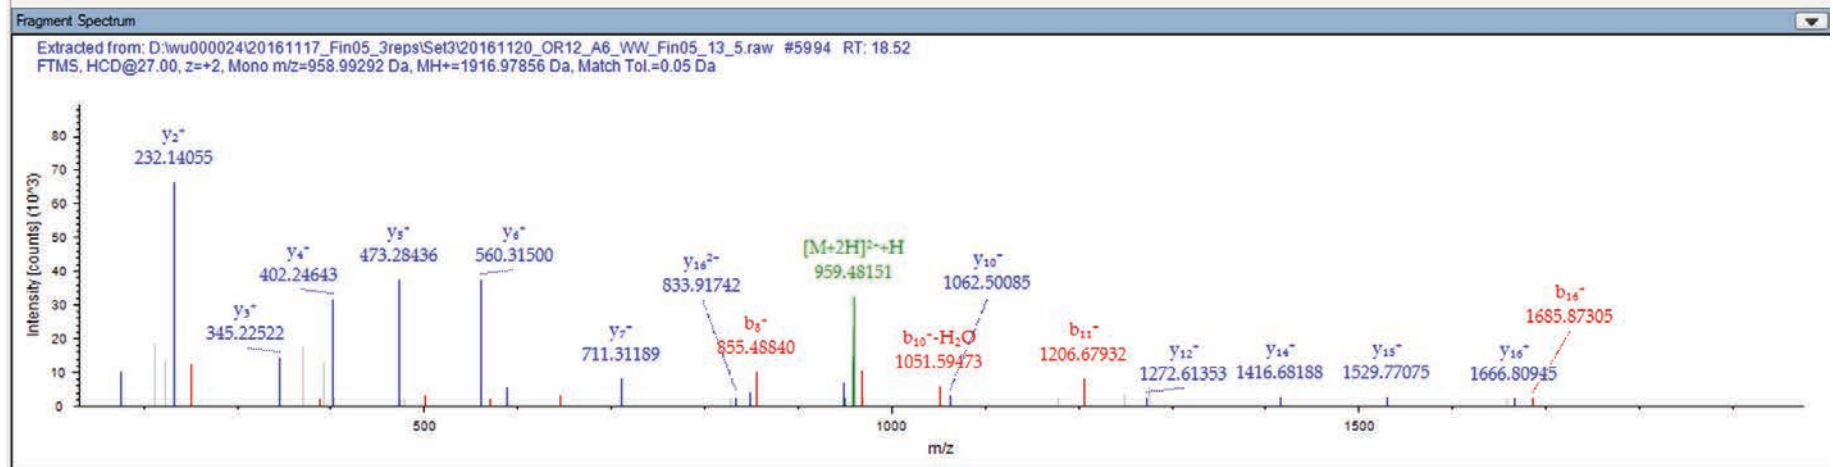



| Uniprot Accession | Description             | Gene name | PTP type     | Sequence      | Hyperoxidised cysteine | Total MS/MS count |
|-------------------|-------------------------|-----------|--------------|---------------|------------------------|-------------------|
| F1QIX3            | Uncharacterized protein | ptpn20    | Non-receptor | GPITVHcSAGIGR | C7(hyper)              | 38                |

#### Peptide Summary

Sequence: GPITVHCSAGIGR, C7-hyperoxidation (47.98474 Da)  
 Charge: +2, Monoisotopic m/z: 658.32465 Da (-0.18 mmu/-0.27 ppm), MH+: 1315.64202 Da, RT: 16.51 min,  
 Identified with: Mascot (v1.30); IonScore:97, Exp Value:2.3E-008, Ions matched by search engine: 10/104  
 Fragment match tolerance used for search: 0.05 Da

#### Fragment Matches

Value Type: Theo. Mass [Da]

Ion Series: Neutral Losses | Precursor Ions

| #1 | b <sup>+</sup> | b <sup>2+</sup> | Seq.    | y <sup>+</sup> | y <sup>2+</sup> | #2 |
|----|----------------|-----------------|---------|----------------|-----------------|----|
| 1  | 58.02875       | 29.51801        | G       |                |                 | 13 |
| 2  | 155.08152      | 78.04440        | P       | 1258.62091     | 629.81409       | 12 |
| 3  | 268.16559      | 134.58643       | I       | 1161.56814     | 581.28771       | 11 |
| 4  | 369.21327      | 185.11027       | T       | 1048.48407     | 524.74567       | 10 |
| 5  | 468.28169      | 234.64448       | V       | 947.43639      | 474.22183       | 9  |
| 6  | 605.34060      | 303.17394       | H       | 848.36797      | 424.68762       | 8  |
| 7  | 756.33453      | 378.67090       | C-hyper | 711.30906      | 356.15817       | 7  |
| 8  | 843.36656      | 422.18692       | S       | 560.31512      | 280.66120       | 6  |
| 9  | 914.40368      | 457.70548       | A       | 473.28309      | 237.14518       | 5  |
| 10 | 971.42515      | 486.21621       | G       | 402.24597      | 201.62662       | 4  |
| 11 | 1084.50922     | 542.75825       | I       | 345.22450      | 173.11589       | 3  |
| 12 | 1141.53069     | 571.26898       | G       | 232.14043      | 116.57385       | 2  |
| 13 |                |                 | R       | 175.11896      | 88.06312        | 1  |

#### Fragment Spectrum

Extracted from: D:\wu000024\20161117\_Fin05\_3reps\Set1\20161117\_OR12\_A6\_VW\_Fin05\_1\_1.raw #4960 RT: 16.51  
 FTMS, HCD@27.00, z=+2, Mono m/z=658.32465 Da, MH+=1315.64202 Da, Match Tol.=0.05 Da

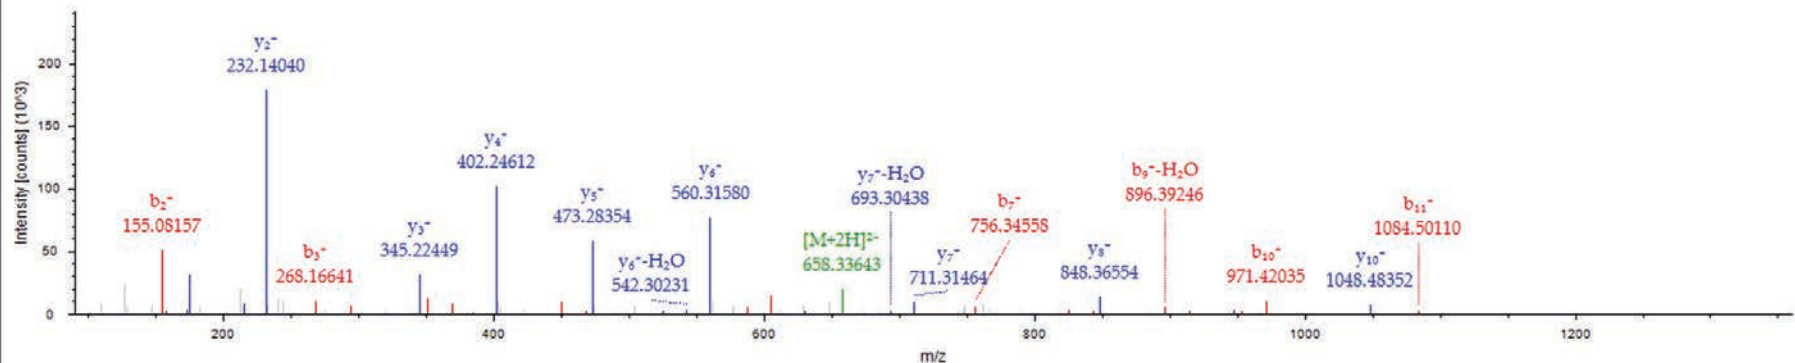

| Uniprot Accession | Description             | Gene name | PTP type     | Sequence         | Hyperoxidised cysteine | Total MS/MS count |
|-------------------|-------------------------|-----------|--------------|------------------|------------------------|-------------------|
| F1Q6T9            | Uncharacterized protein | ptpn21    | Non-receptor | NTNLPVLVHcSAGVGR | C10(hyper)             | 29                |

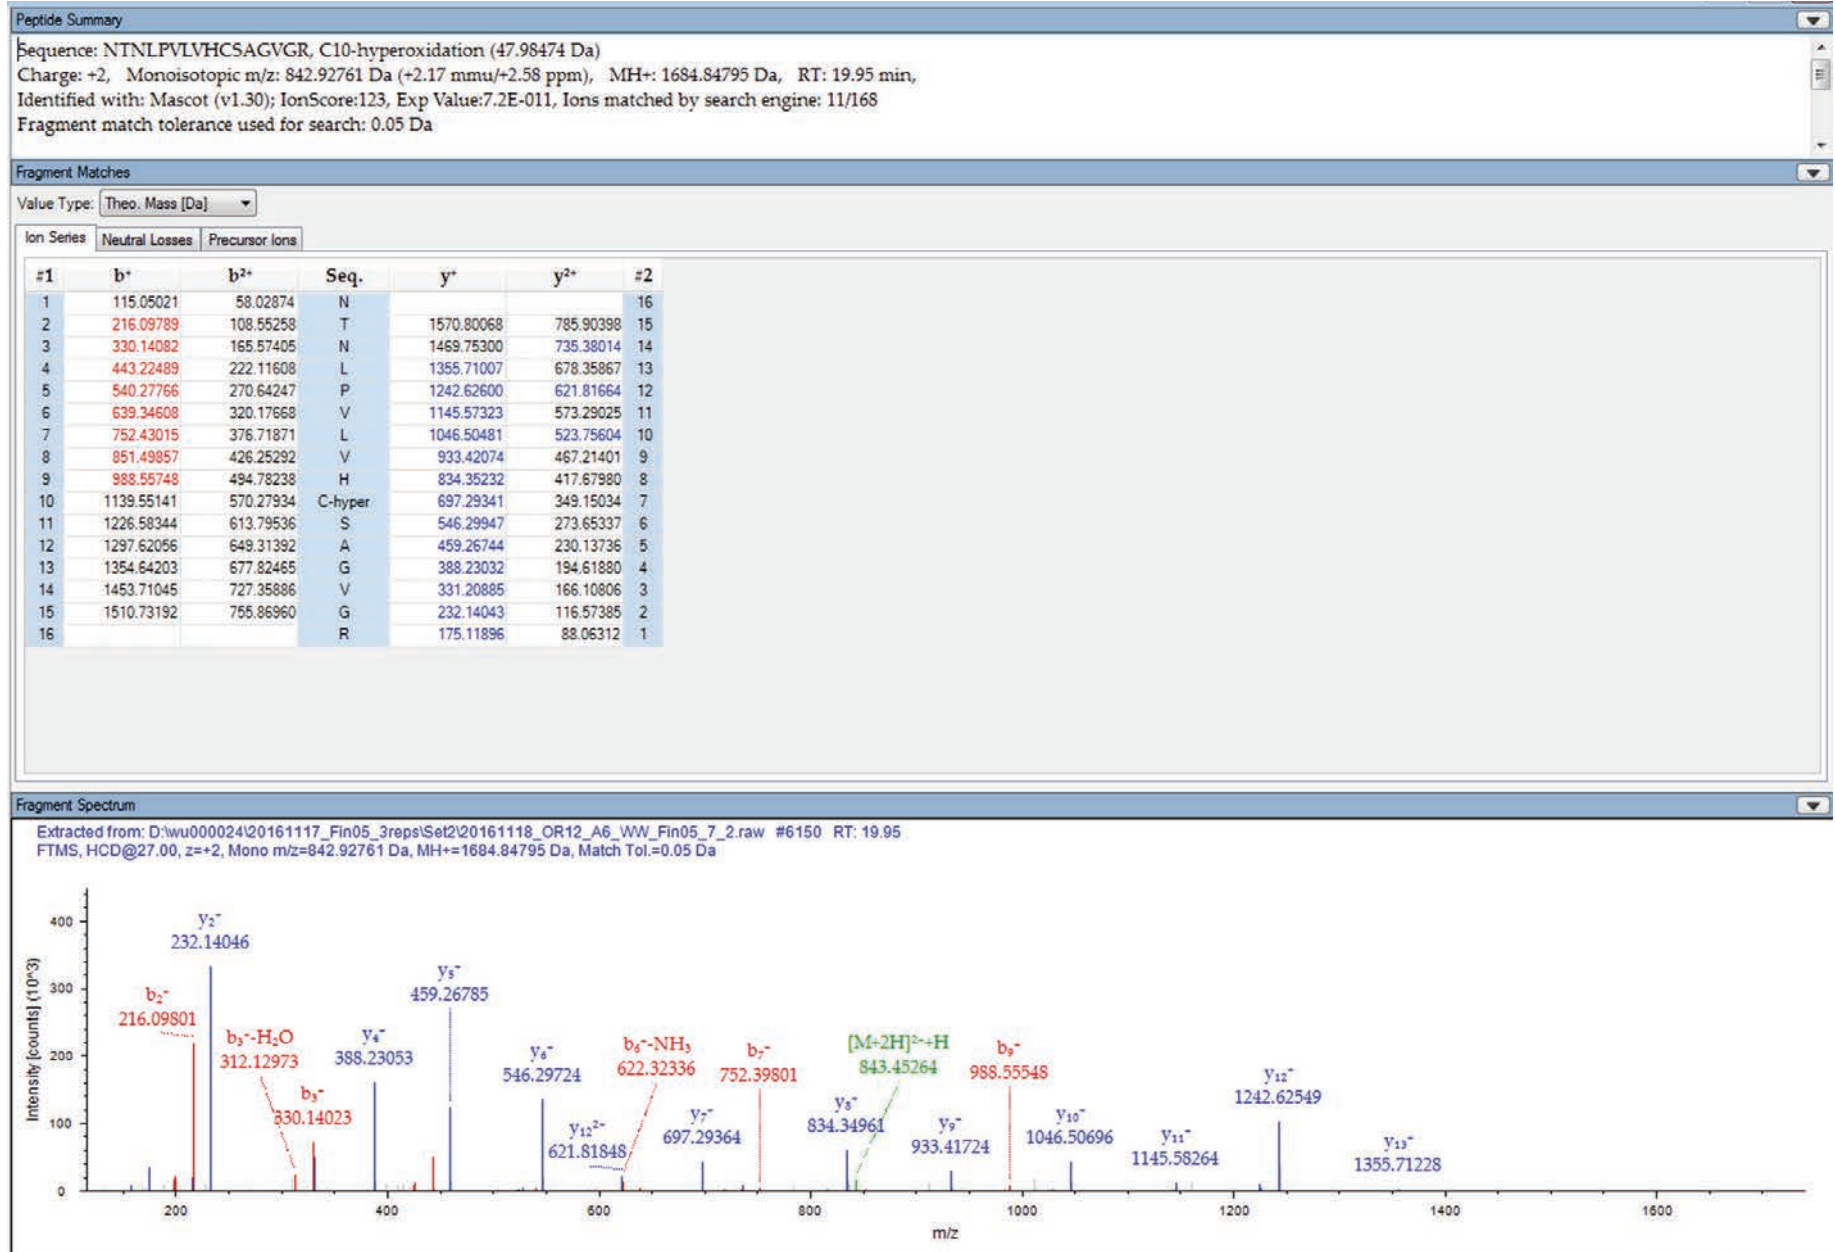

| Uniprot Accession | Description                                   | Gene name | PTP type     | Sequence                      | Hyperoxidised cysteine | Total MS/MS count |
|-------------------|-----------------------------------------------|-----------|--------------|-------------------------------|------------------------|-------------------|
| C7U128            | Protein-tyrosine phosphatase LyPTP (Fragment) | ptpn22    | Non-receptor | IYQDNEEIPIC <b>IHC</b> SAGcGR | C18(hyper)             | 13                |

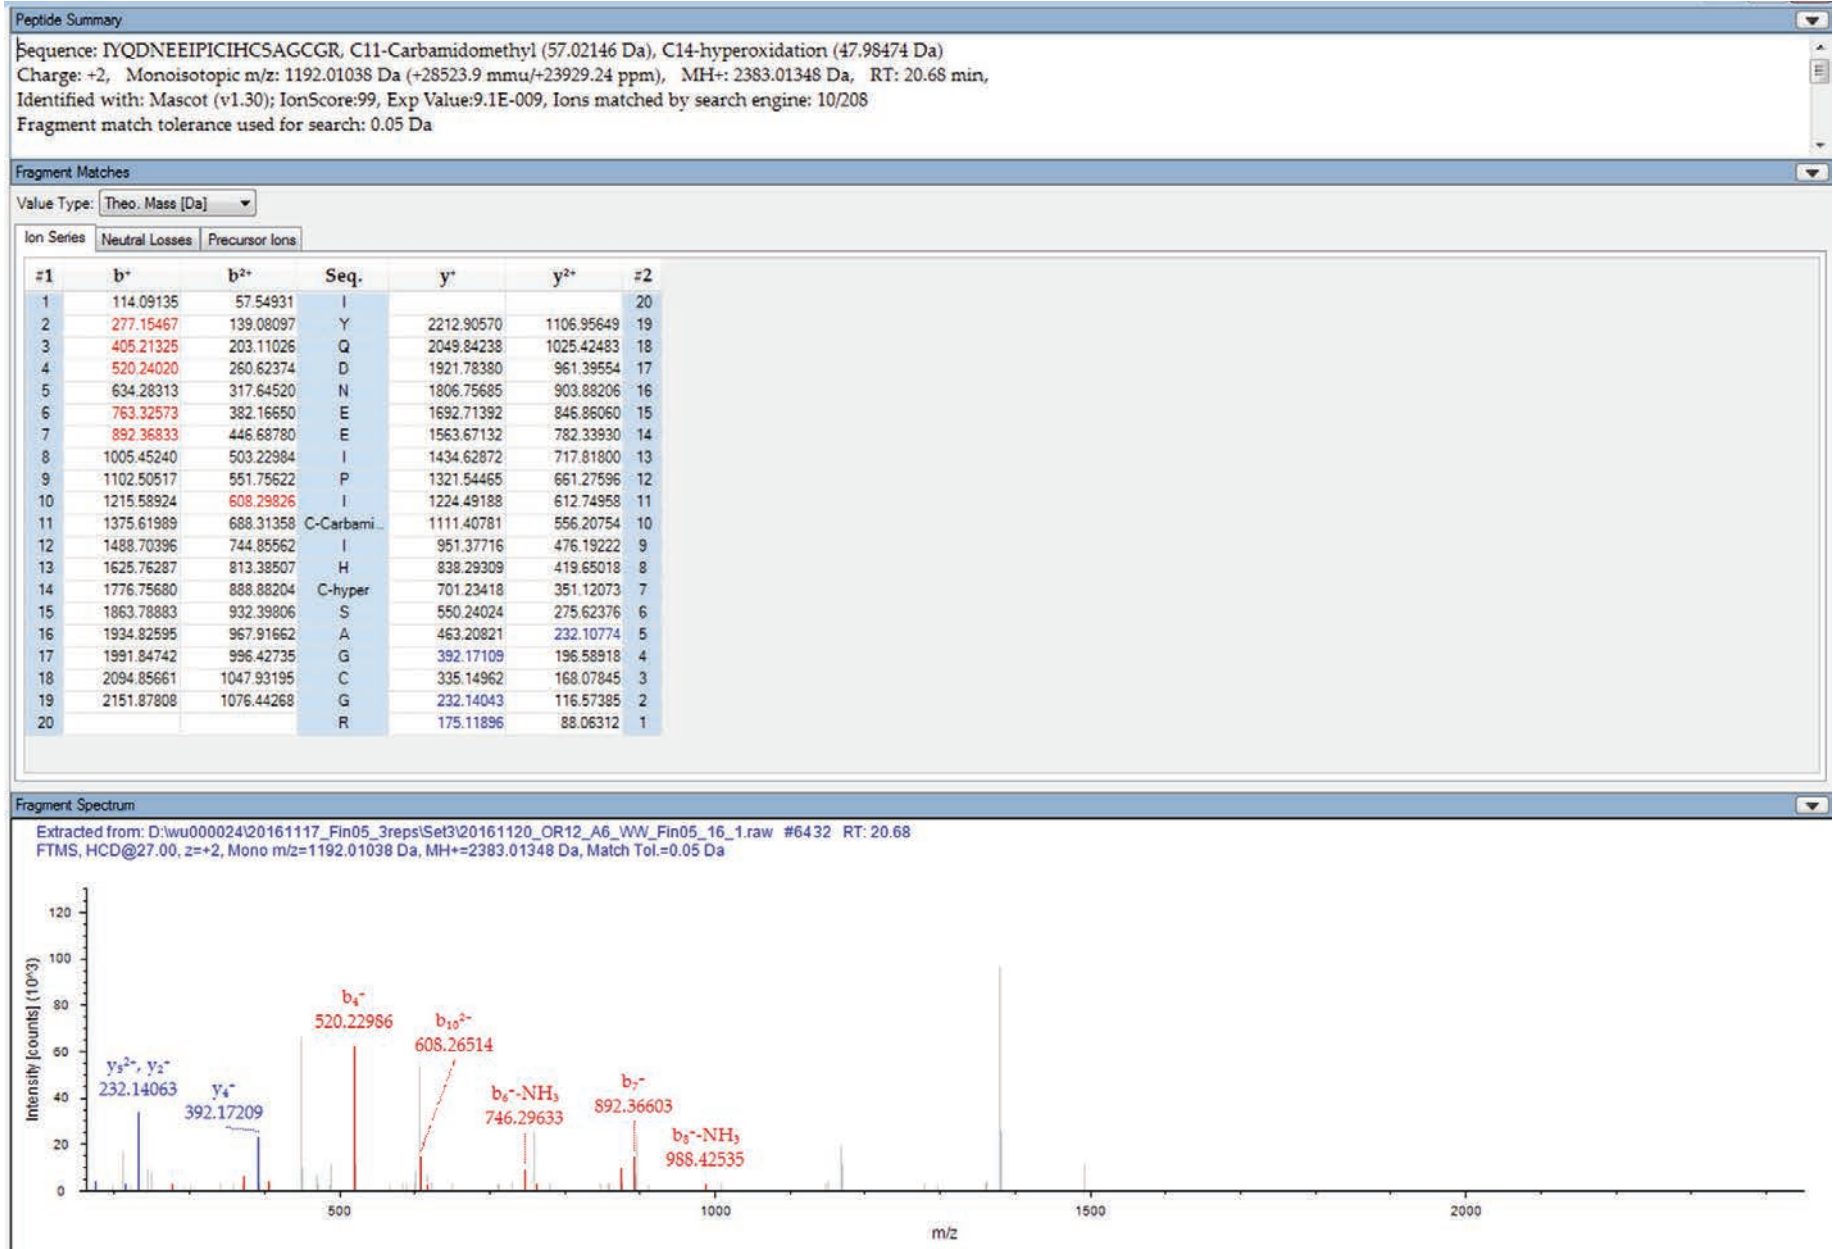

| Uniprot Accession | Description             | Gene name | PTP type     | Sequence          | Hyperoxidised cysteine | Total MS/MS count |
|-------------------|-------------------------|-----------|--------------|-------------------|------------------------|-------------------|
| F1R1D1            | Uncharacterized protein | ptpn23a   | Non-receptor | VScTHFQcSAGAFAYLR | C8(hyper)              | 138               |

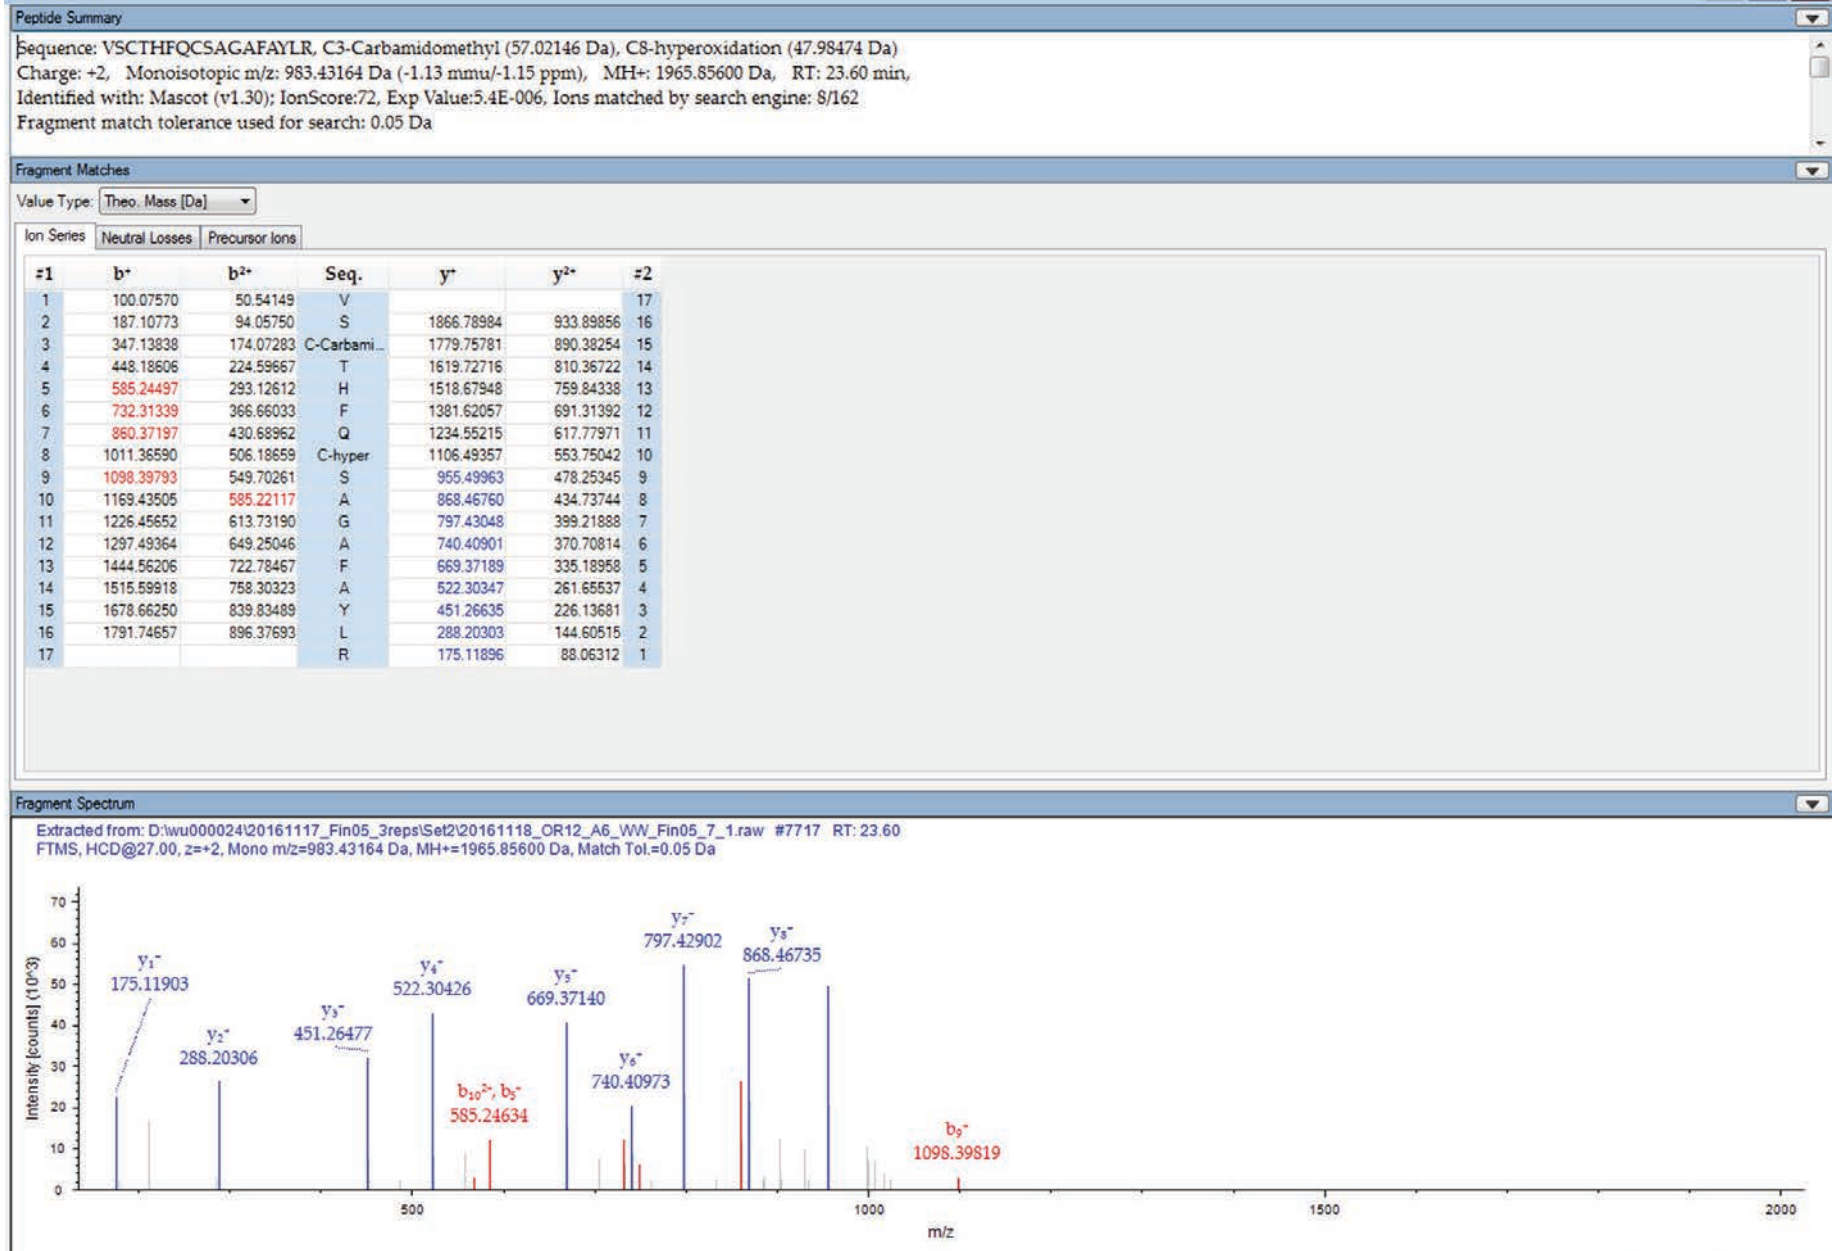



| Uniprot Accession | Description                                    | Gene name | PTP type     | Sequence                       | Hyperoxidised cysteine | Total MS/MS count |
|-------------------|------------------------------------------------|-----------|--------------|--------------------------------|------------------------|-------------------|
| F1QXQ5 (F1QGX6)   | Tyrosine-protein phosphatase non-receptor type | ptpn2a    | Non-receptor | ESGSLGPENGPVV <b>VHcSAGIGR</b> | C16(hyper)             | 86                |

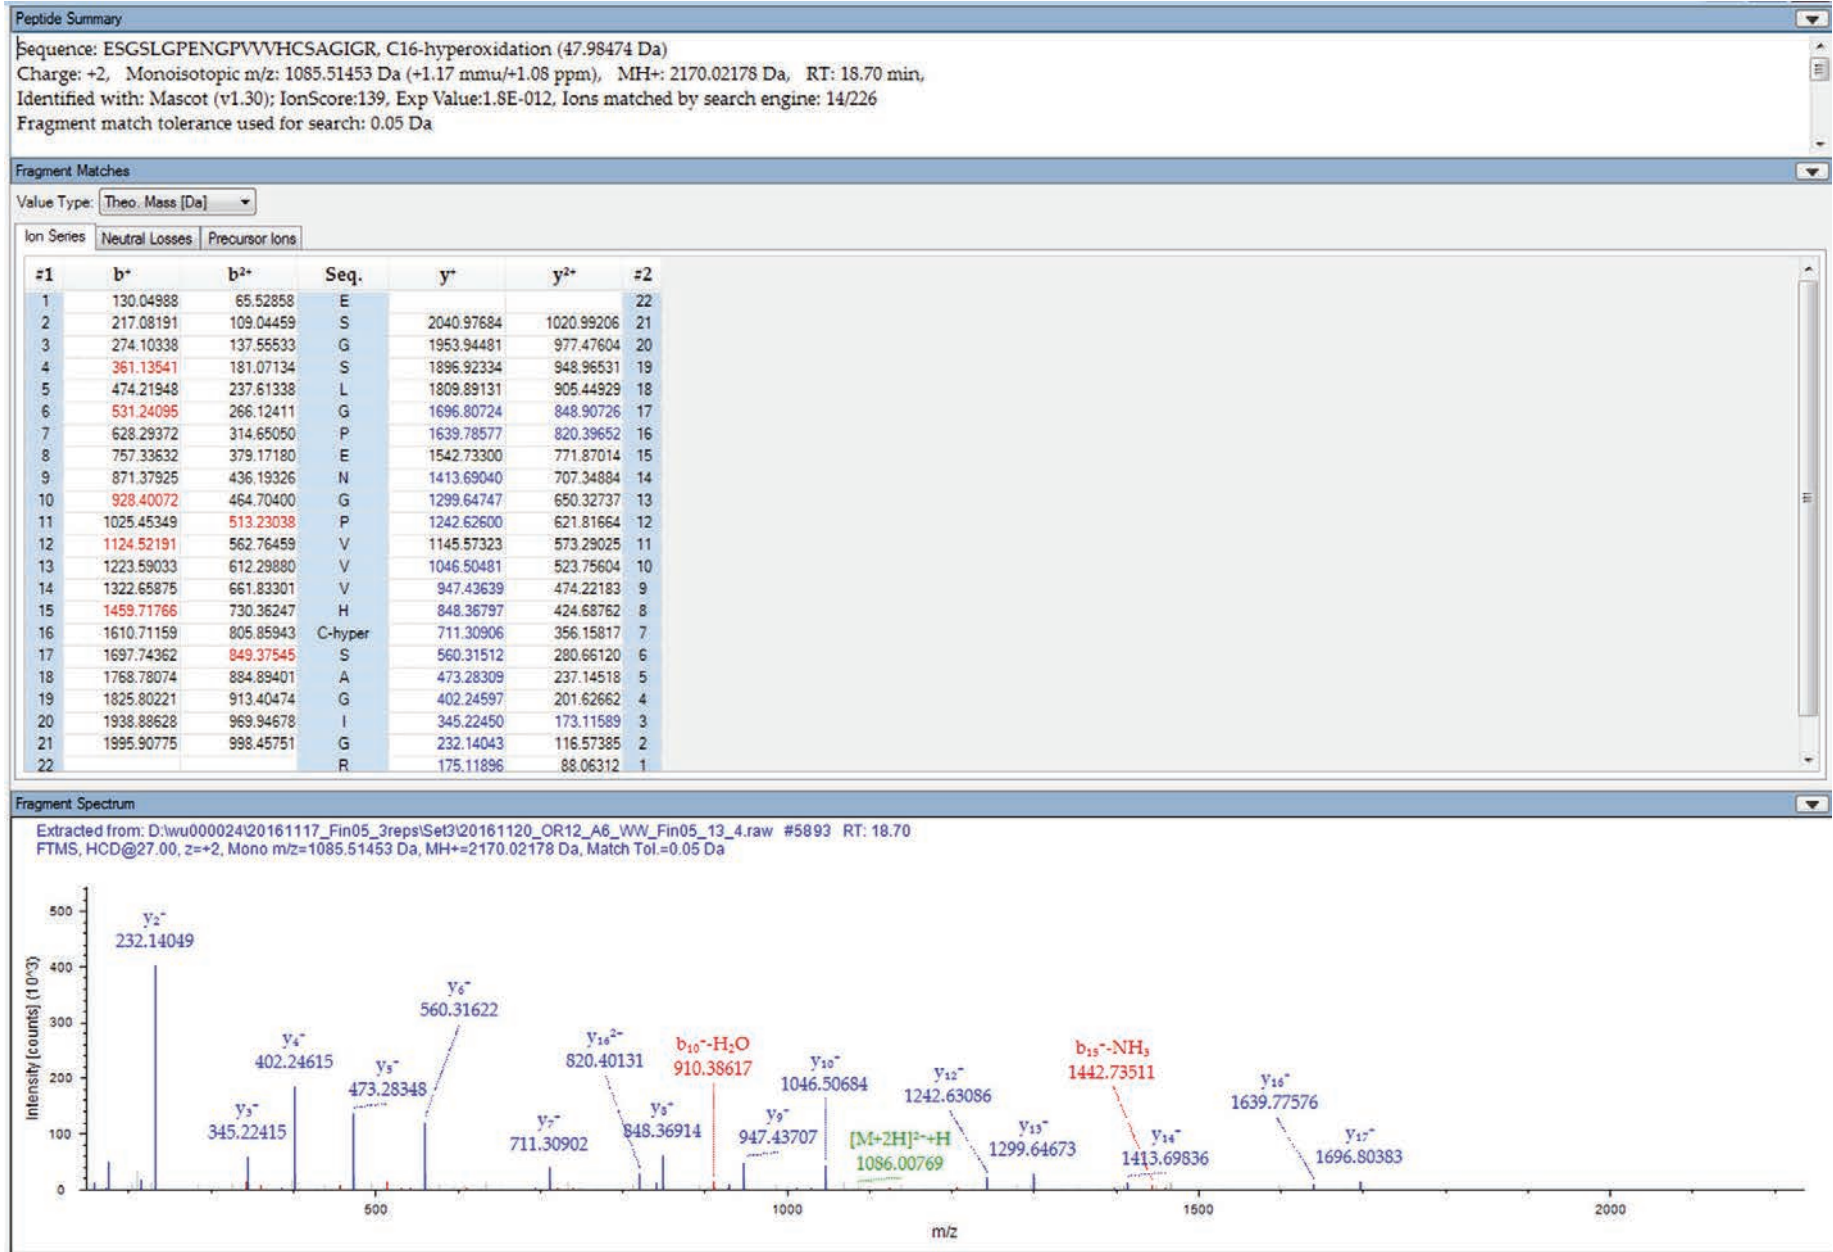

| Uniprot Accession | Description                                    | Gene name | PTP type     | Sequence                        | Hyperoxidised cysteine | Total MS/MS count |
|-------------------|------------------------------------------------|-----------|--------------|---------------------------------|------------------------|-------------------|
| Q6NY86            | Tyrosine-protein phosphatase non-receptor type | ptpn2b    | Non-receptor | ESGSLGMEQGPAAV <b>VHcSAGIGR</b> | C16(hyper)             | 159               |

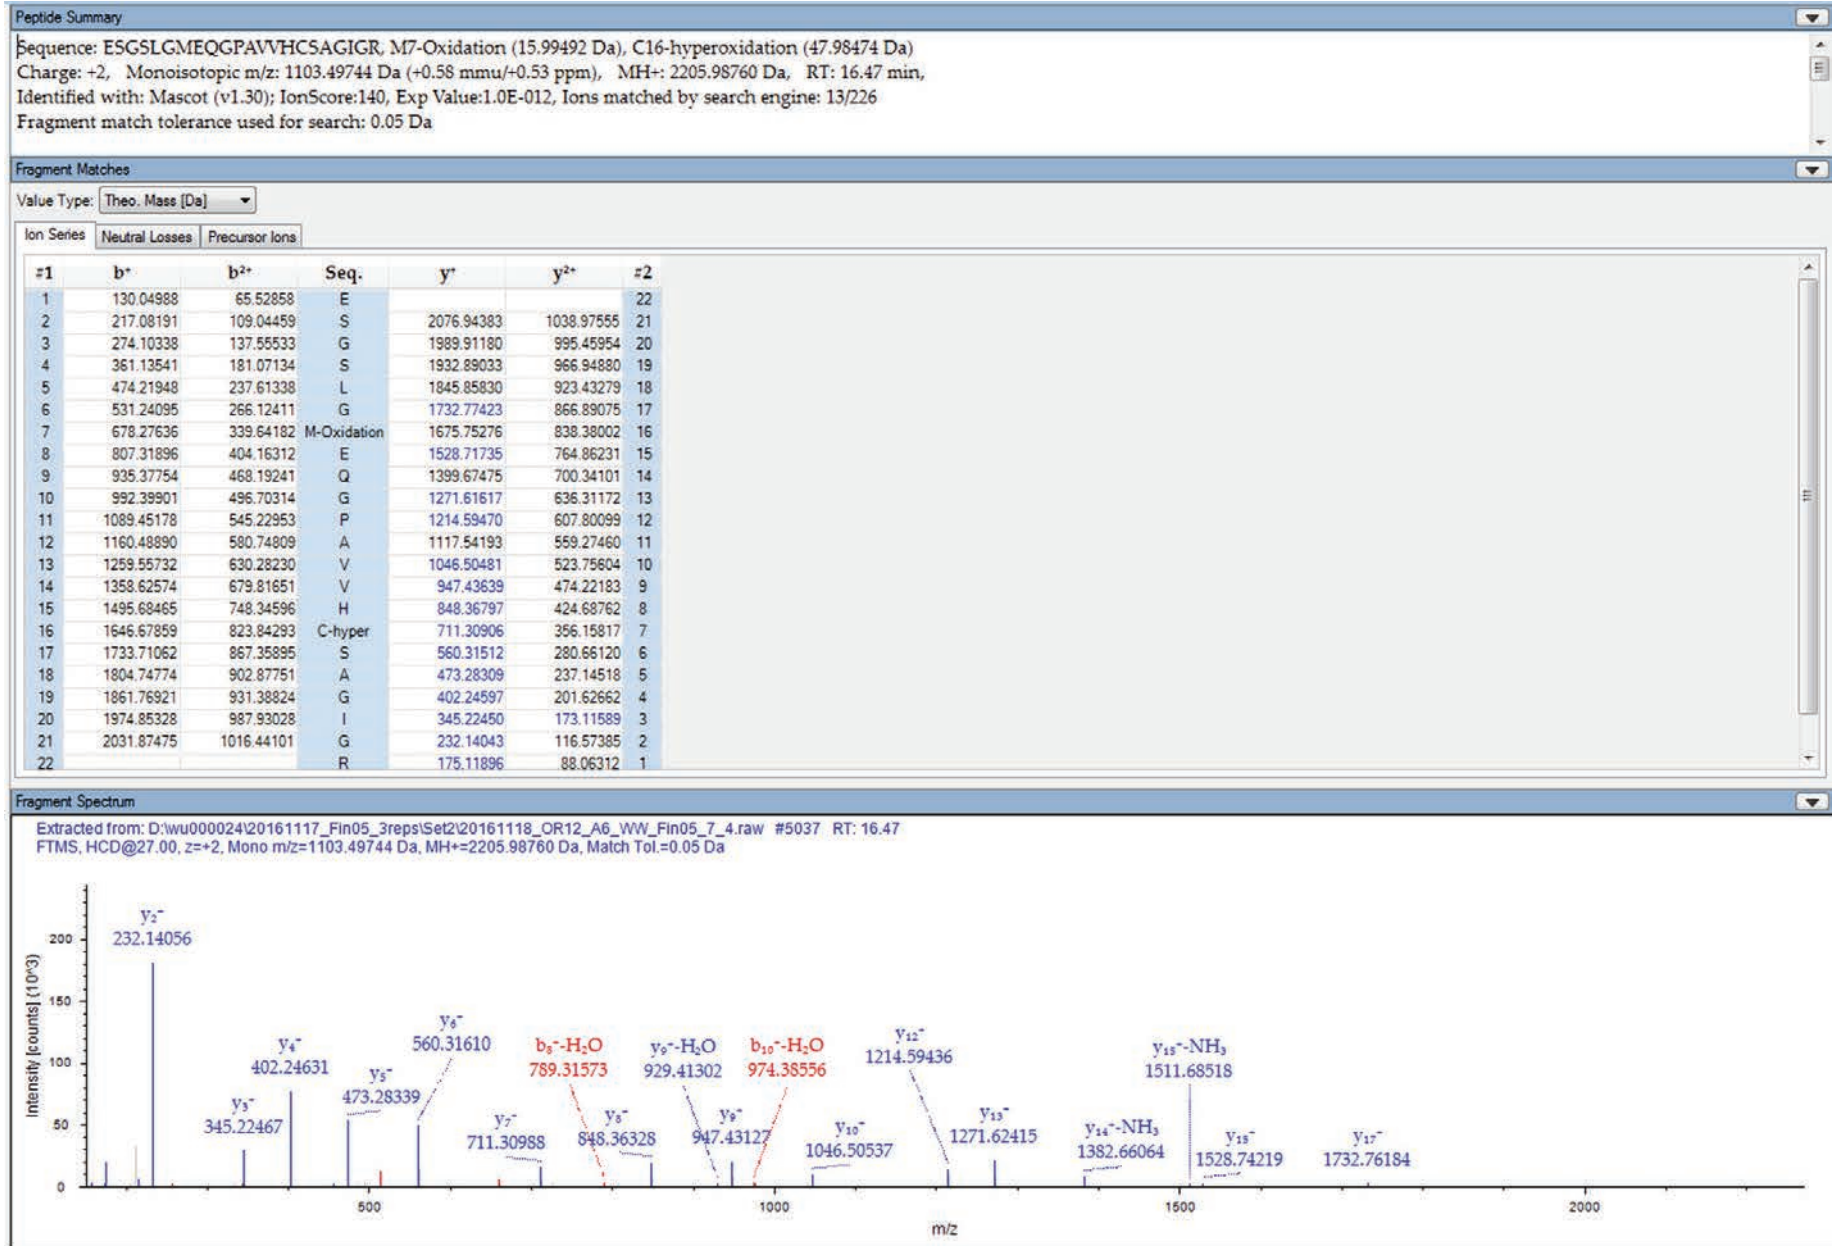

| Uniprot Accession | Description             | Gene name | PTP type     | Sequence         | Hyperoxidised cysteine | Total MS/MS count |
|-------------------|-------------------------|-----------|--------------|------------------|------------------------|-------------------|
| F1QLN8            | Uncharacterized protein | ptpn3     | Non-receptor | QESVPLMVHCSAGIGR | C10(hyper)             | 97                |

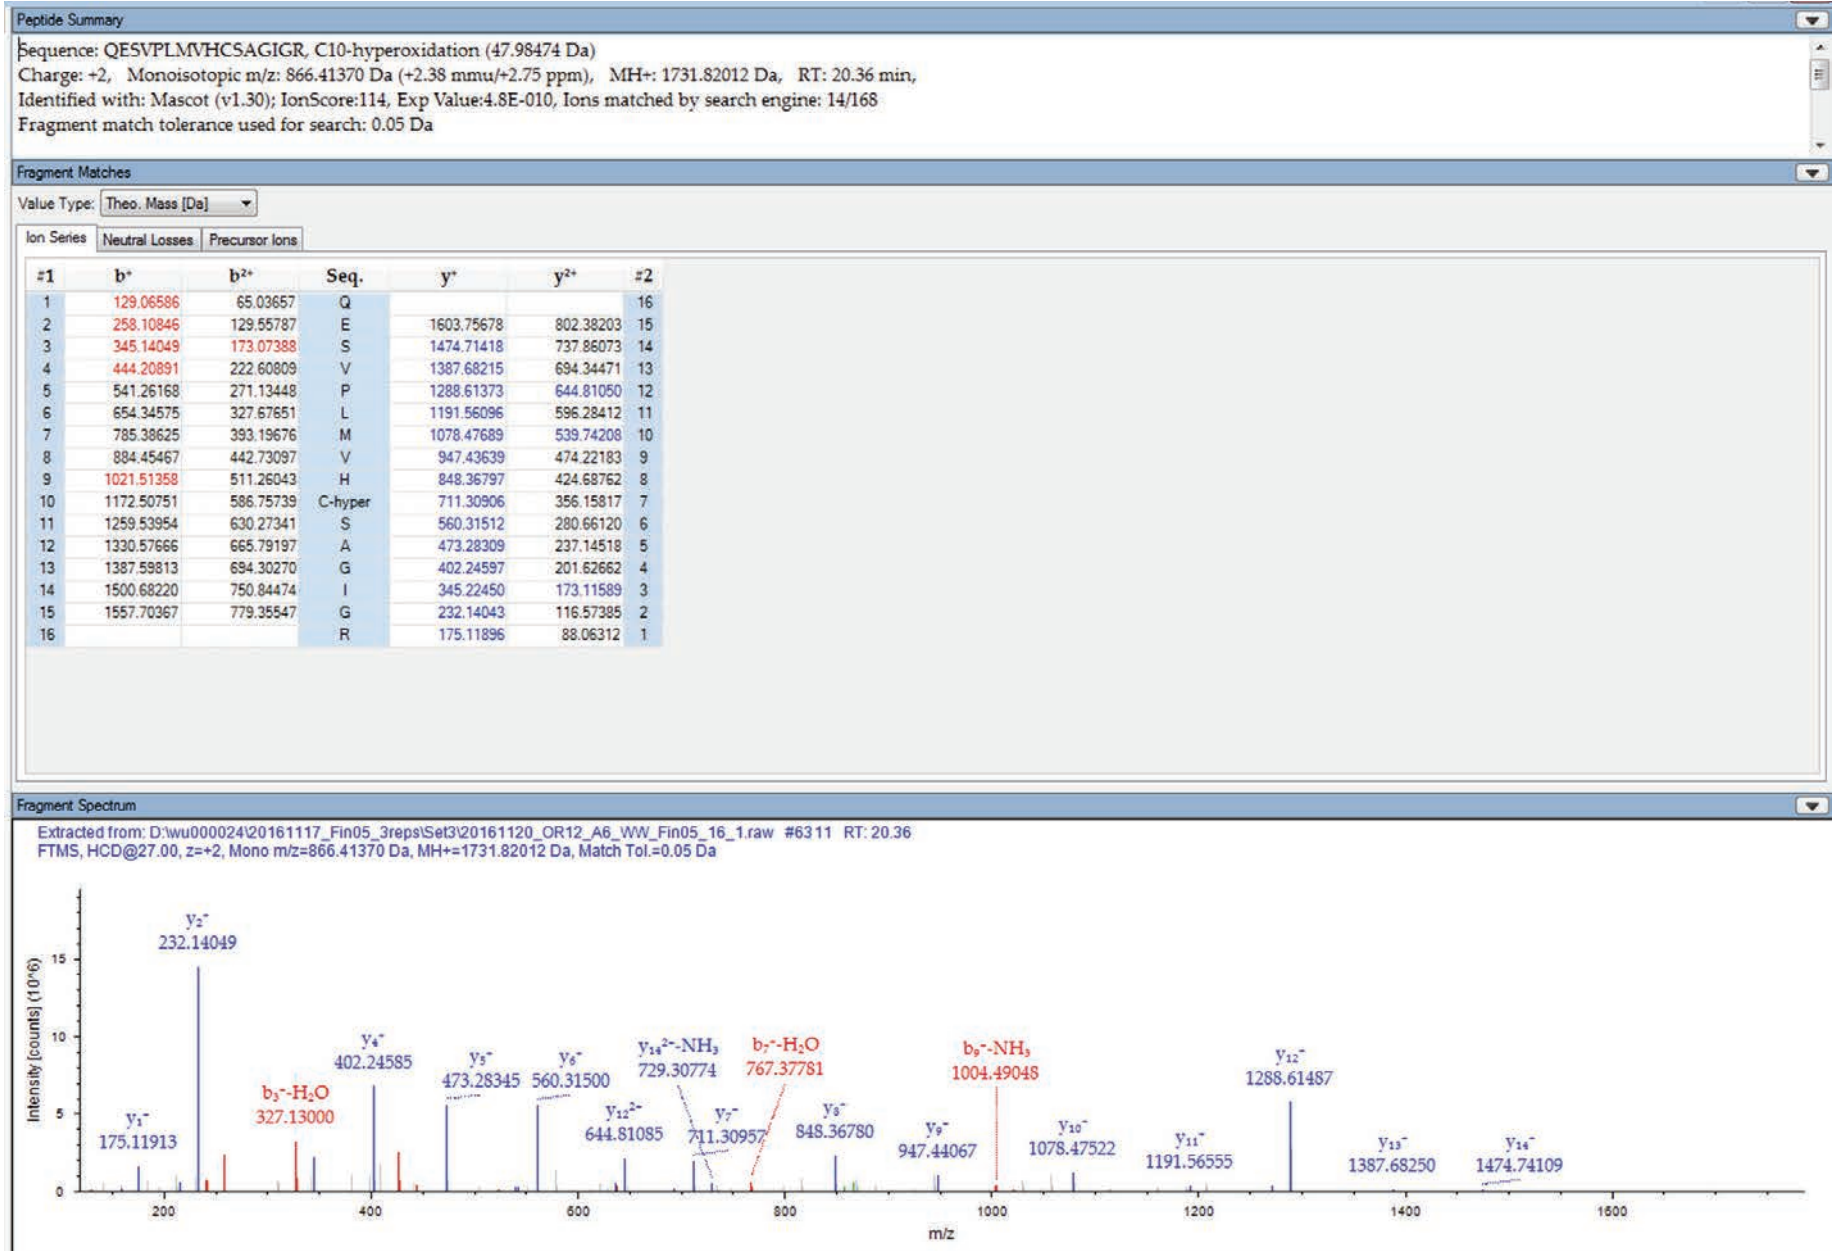

| Uniprot Accession | Description                                   | Gene name | PTP type     | Sequence               | Hyperoxidised cysteine | Total MS/MS count |
|-------------------|-----------------------------------------------|-----------|--------------|------------------------|------------------------|-------------------|
| C7U127            | Protein-tyrosine phosphatase MEG1a (Fragment) | ptpn4a    | Non-receptor | DEPVV <b>VHcSAGIGR</b> | C8(hyper)              | 19                |

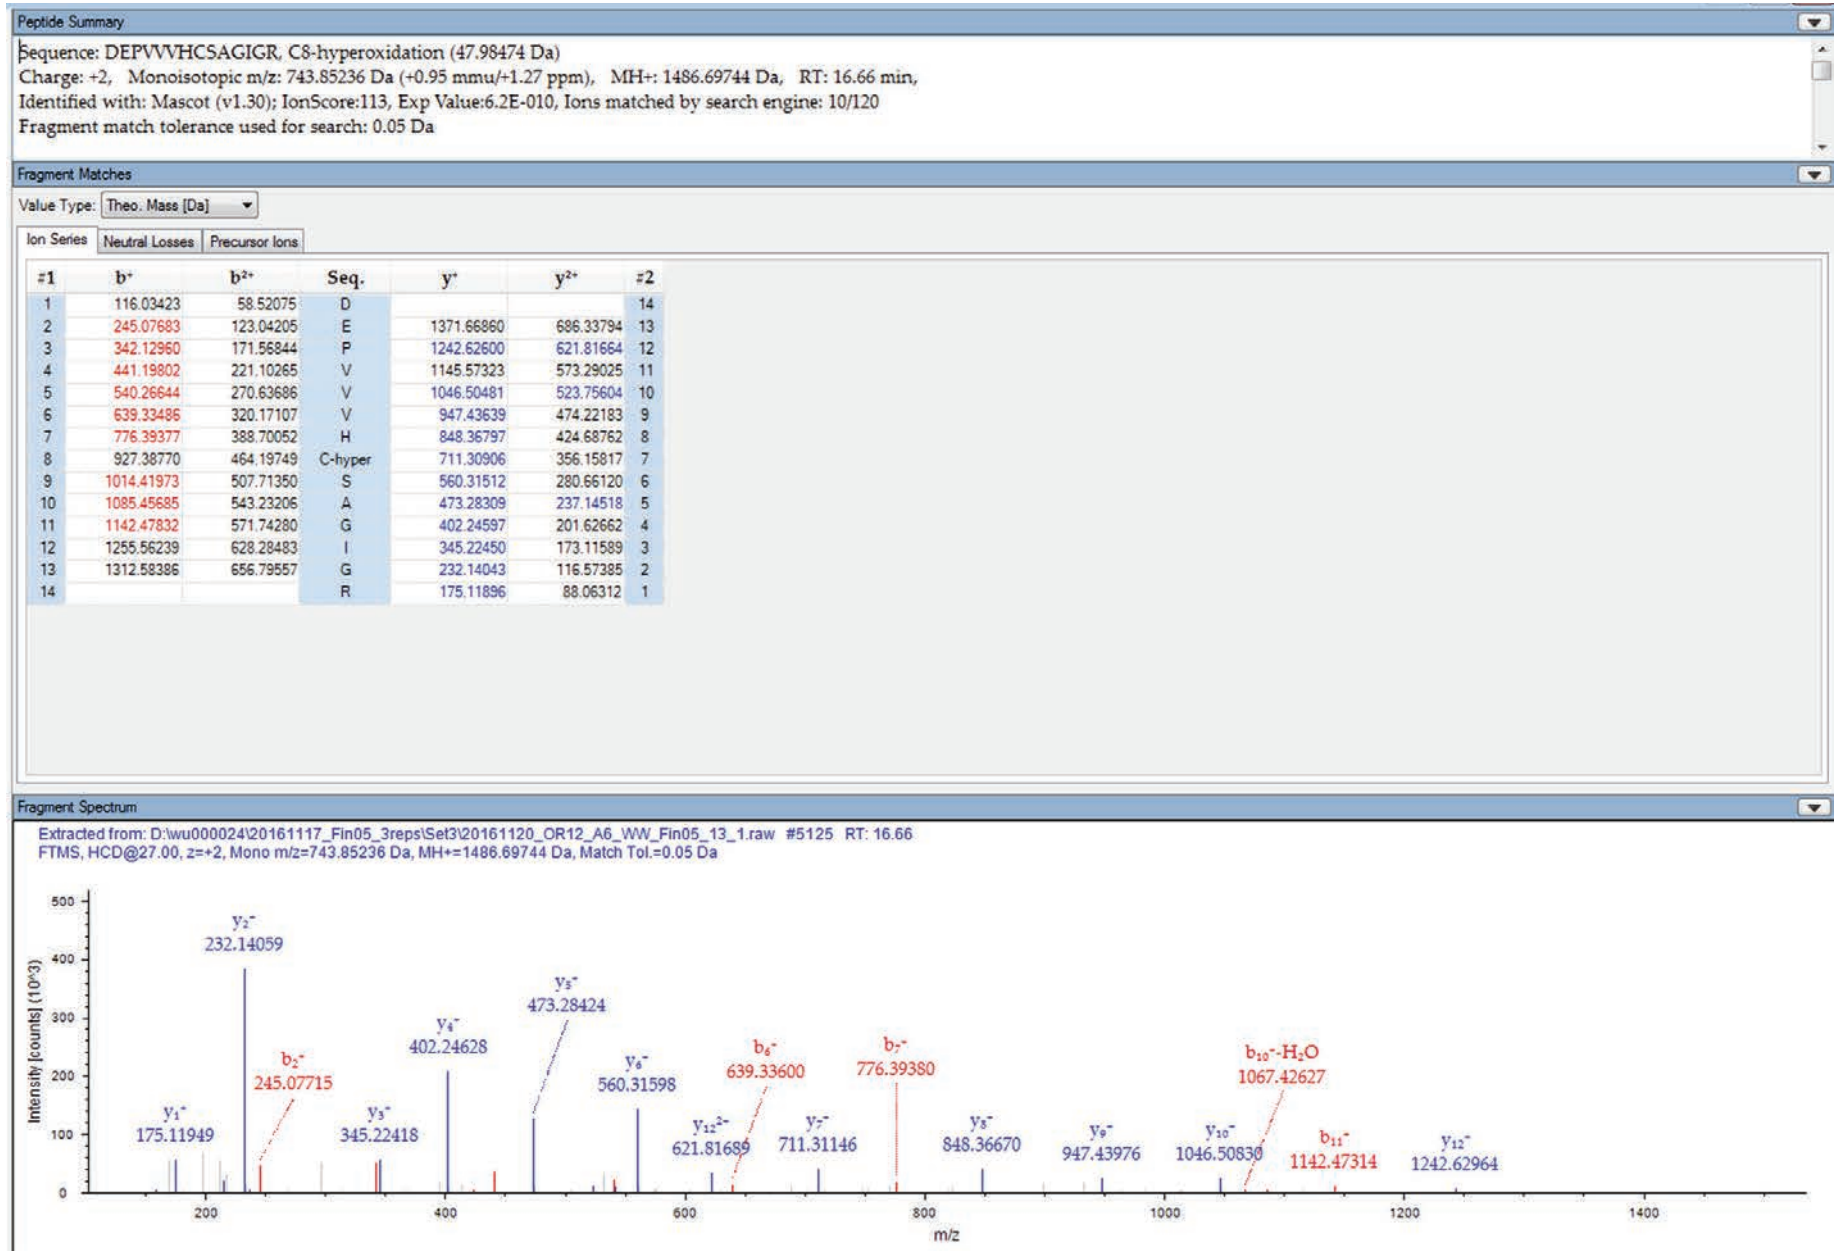



| Uniprot Accession | Description                                   | Gene name | PTP type     | Sequence                  | Hyperoxidised cysteine | Total MS/MS count |
|-------------------|-----------------------------------------------|-----------|--------------|---------------------------|------------------------|-------------------|
| C7U113            | Protein-tyrosine phosphatase MEG1a (Fragment) | ptpn4b    | Non-receptor | ADGPEPVV <b>VHCSAGIGR</b> | C11(hyper)             | 156               |

Peptide Summary  
 Sequence: ADGPEPVV**VHCSAGIGR**, C11-hyperoxidation (47.98474 Da)  
 Charge: +2, Monoisotopic m/z: 856.40961 Da (+2.52 mmu/+2.94 ppm), MH+: 1711.81194 Da, RT: 17.34 min,  
 Identified with: Mascot (v1.30); IonScore:98, Exp Value:2.4E-008, Ions matched by search engine: 12/148  
 Fragment match tolerance used for search: 0.05 Da

Fragment Matches

Value Type:

| Ion Series | Neutral Losses | Precursor Ions |
|------------|----------------|----------------|
| #1         | b*             | b2*            |
| #2         |                | y*             |
| #1         |                | y2*            |
| #2         |                |                |
| #1         |                | Seq.           |
| #2         |                |                |

| #1 | b*         | b2*       | Seq.    | y*         | y2*       | #2 |
|----|------------|-----------|---------|------------|-----------|----|
| 1  | 72.04440   | 36.52584  | A       |            |           | 17 |
| 2  | 187.07135  | 94.03931  | D       | 1640.76979 | 820.88853 | 16 |
| 3  | 244.09282  | 122.55005 | G       | 1525.74284 | 763.37506 | 15 |
| 4  | 341.14559  | 171.07643 | P       | 1468.72137 | 734.86432 | 14 |
| 5  | 470.18819  | 235.59773 | E       | 1371.66860 | 686.33794 | 13 |
| 6  | 567.24096  | 284.12412 | P       | 1242.62600 | 621.81664 | 12 |
| 7  | 666.30938  | 333.65833 | V       | 1145.57323 | 573.29025 | 11 |
| 8  | 765.37780  | 383.19254 | V       | 1046.50481 | 523.75604 | 10 |
| 9  | 864.44622  | 432.72675 | V       | 947.43639  | 474.22183 | 9  |
| 10 | 1001.50513 | 501.25620 | H       | 848.36797  | 424.68762 | 8  |
| 11 | 1152.49906 | 576.75317 | C-hyper | 711.30906  | 356.15817 | 7  |
| 12 | 1239.53109 | 620.26918 | S       | 560.31512  | 280.66120 | 6  |
| 13 | 1310.56821 | 655.78774 | A       | 473.28309  | 237.14518 | 5  |
| 14 | 1367.58968 | 684.29848 | G       | 402.24597  | 201.62662 | 4  |
| 15 | 1480.67375 | 740.84051 | I       | 345.22450  | 173.11589 | 3  |
| 16 | 1537.69522 | 769.35125 | G       | 232.14043  | 116.57385 | 2  |
| 17 |            |           | R       | 175.11896  | 88.06312  | 1  |

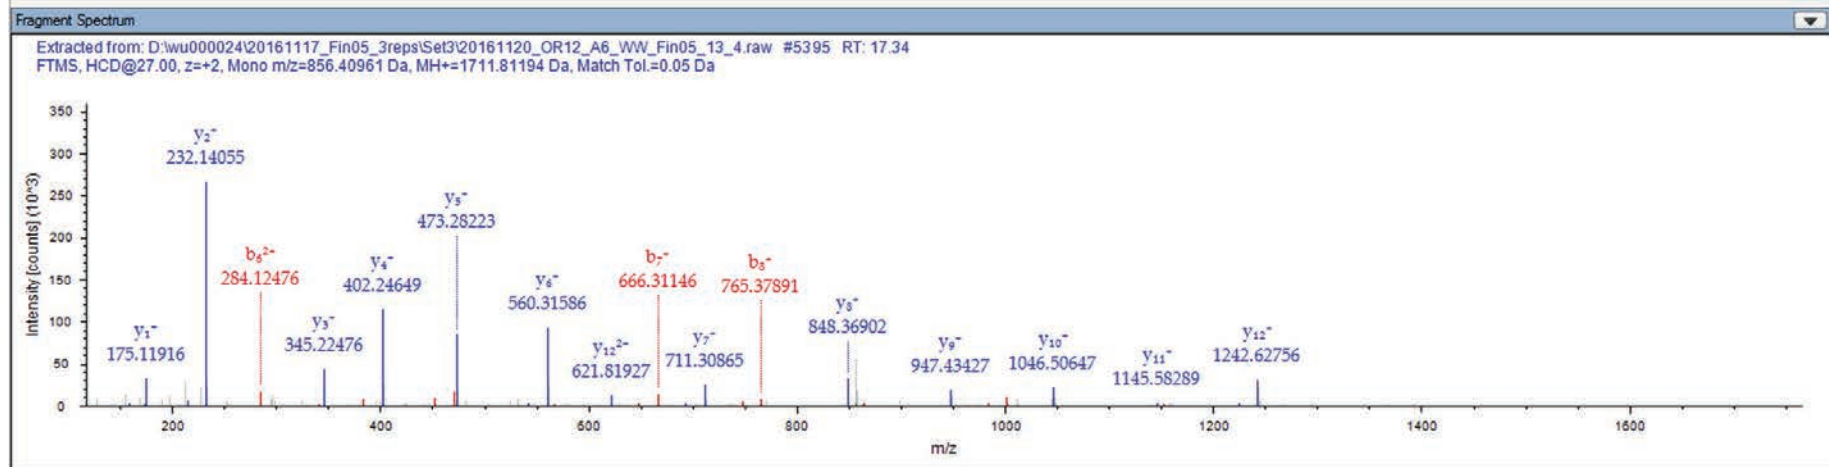

| Uniprot Accession | Description                                   | Gene name | PTP type     | Sequence       | Hyperoxidised cysteine | Total MS/MS count |
|-------------------|-----------------------------------------------|-----------|--------------|----------------|------------------------|-------------------|
| C7U118            | Protein-tyrosine phosphatase SHP-1 (Fragment) | ptpn6     | Non-receptor | SSAPIVHCSAGIGR | C9(hyper)              | 82                |

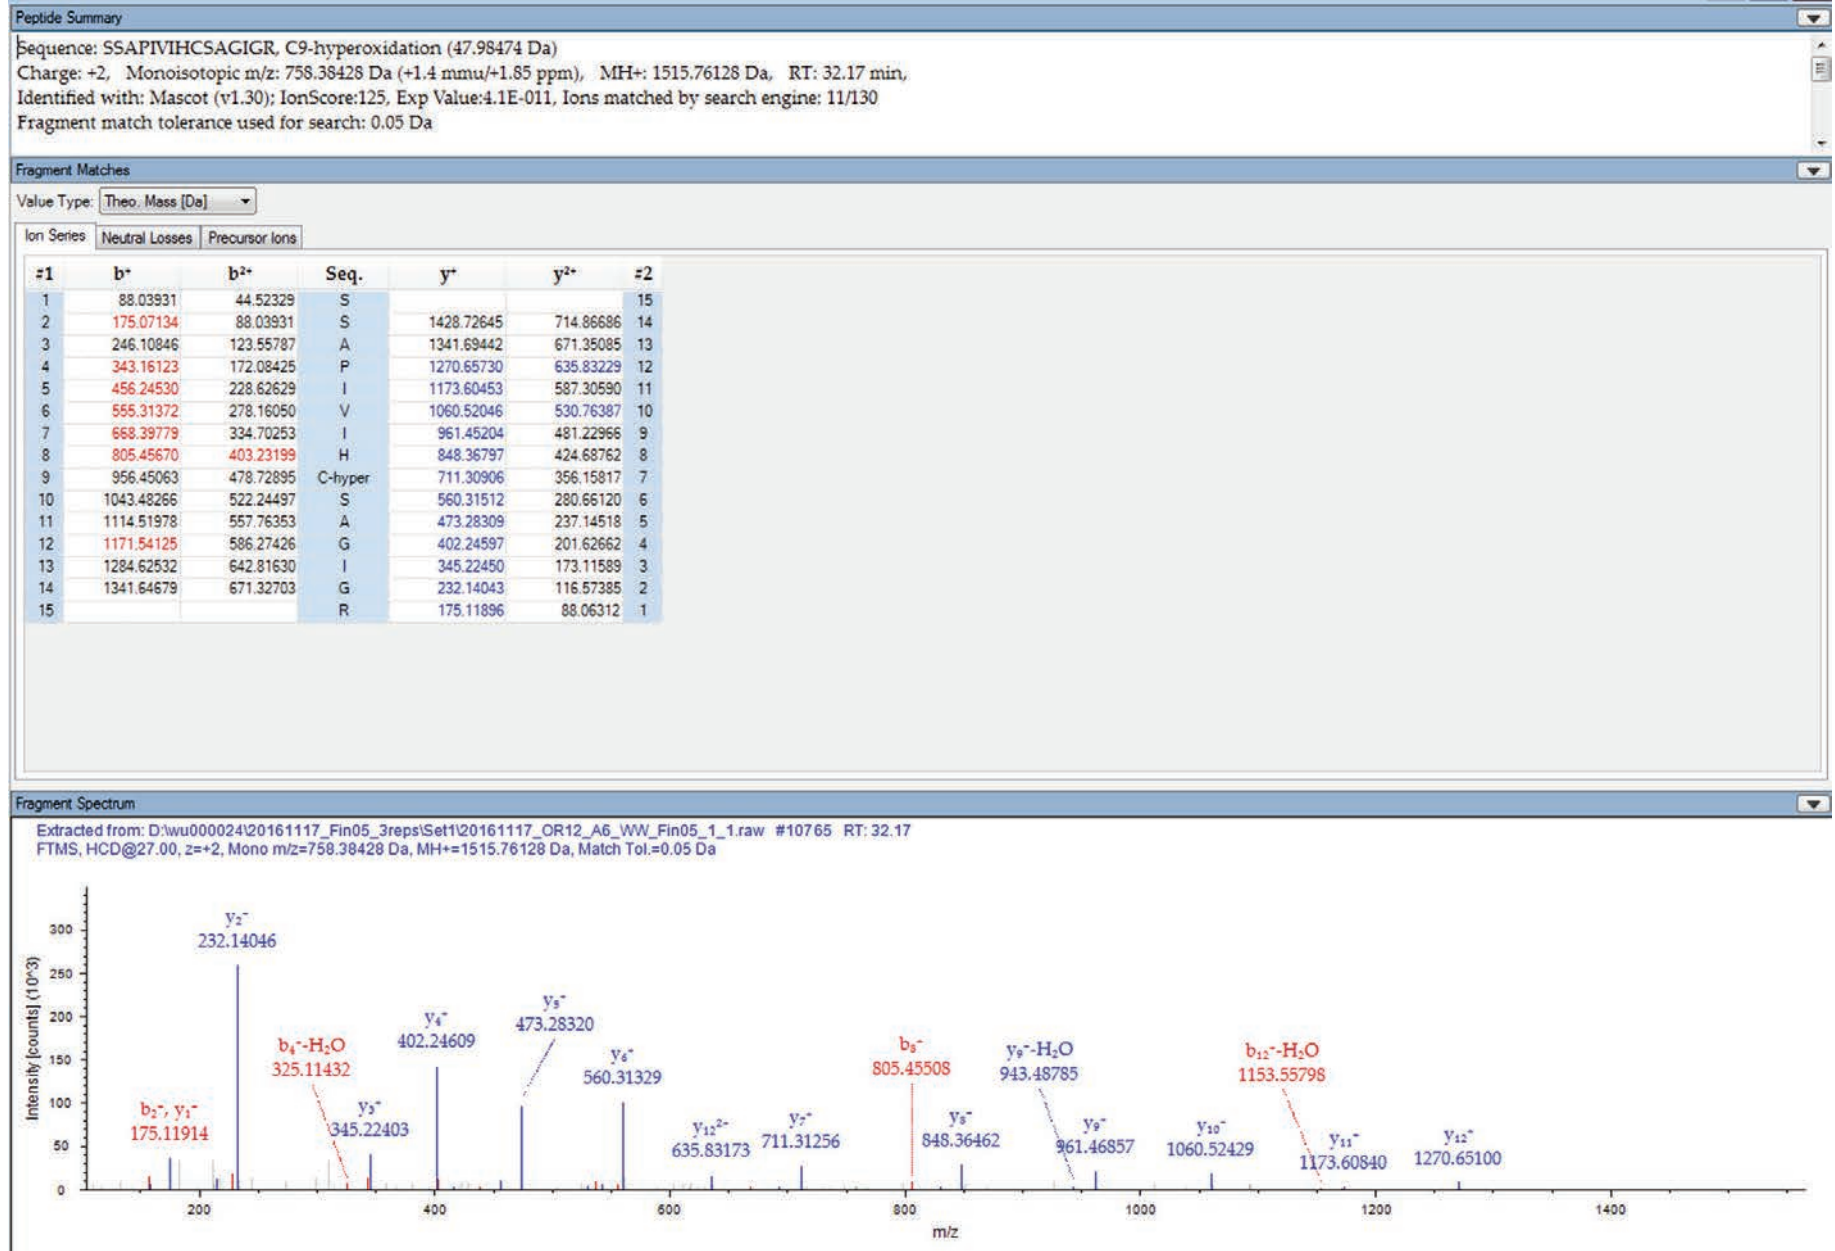

| Uniprot Accession | Description                        | Gene name | PTP type     | Sequence                   | Hyperoxidised cysteine | Total MS/MS count |
|-------------------|------------------------------------|-----------|--------------|----------------------------|------------------------|-------------------|
| X1WVF4            | Uncharacterized protein (Fragment) | ptpn9a    | Non-receptor | GHPLGPPMV <b>VHcSAGIGR</b> | C12(hyper)             | 170               |

Peptide Summary

Sequence: GHPLGPPMV**VHcSAGIGR**, MS-Oxidation (15.99492 Da), C12-hyperoxidation (47.98474 Da)  
 Charge: +2, Monoisotopic m/z: 924.94702 Da (+1.16 mmu/+1.25 ppm), MH+: 1848.88677 Da, RT: 17.30 min,  
 Identified with: Mascot (v1.30); IonScore:123, Exp Value:7.6E-011, Ions matched by search engine: 12/136  
 Fragment match tolerance used for search: 0.05 Da

Fragment Matches

Value Type: Theo. Mass [Da]

Ion Series: Neutral Losses Precursor Ions

| #1 | b <sup>+</sup> | b <sup>2+</sup> | Seq.        | y <sup>+</sup> | y <sup>2+</sup> | #2 |
|----|----------------|-----------------|-------------|----------------|-----------------|----|
| 1  | 58.02875       | 29.51801        | G           |                |                 | 18 |
| 2  | 195.08766      | 98.04747        | H           | 1791.86298     | 896.43513       | 17 |
| 3  | 292.14043      | 146.57385       | P           | 1654.80407     | 827.90567       | 16 |
| 4  | 405.22450      | 203.11589       | L           | 1557.75130     | 779.37929       | 15 |
| 5  | 462.24597      | 231.62662       | G           | 1444.66723     | 722.83725       | 14 |
| 6  | 559.29874      | 280.15301       | P           | 1387.64576     | 694.32652       | 13 |
| 7  | 656.35151      | 328.67939       | P           | 1290.59299     | 645.80013       | 12 |
| 8  | 803.38692      | 402.19710       | M-Oxidation | 1193.54022     | 597.27375       | 11 |
| 9  | 902.45534      | 451.73131       | V           | 1046.50481     | 523.75604       | 10 |
| 10 | 1001.52376     | 501.26552       | V           | 947.43639      | 474.22183       | 9  |
| 11 | 1138.58267     | 569.79497       | H           | 848.36797      | 424.68762       | 8  |
| 12 | 1289.57661     | 645.29194       | C-hyper     | 711.30906      | 356.15817       | 7  |
| 13 | 1376.60864     | 688.80796       | S           | 560.31512      | 280.66120       | 6  |
| 14 | 1447.64576     | 724.32652       | A           | 473.28309      | 237.14518       | 5  |
| 15 | 1504.66723     | 752.83725       | G           | 402.24597      | 201.62662       | 4  |
| 16 | 1617.75130     | 809.37929       | I           | 345.22450      | 173.11589       | 3  |
| 17 | 1674.77277     | 837.89002       | G           | 232.14043      | 116.57385       | 2  |
| 18 |                |                 | R           | 175.11896      | 88.06312        | 1  |

Fragment Spectrum

Extracted from: D:\wu000024\20161117\_Fin05\_3reps\Set3\20161120\_OR12\_A6\_VW\_Fin05\_13\_1.raw #5357 RT: 17.30  
 FTMS, HCD@27.00, z=+2, Mono m/z=924.94702 Da, MH+=1848.88677 Da, Match Tol.=0.05 Da

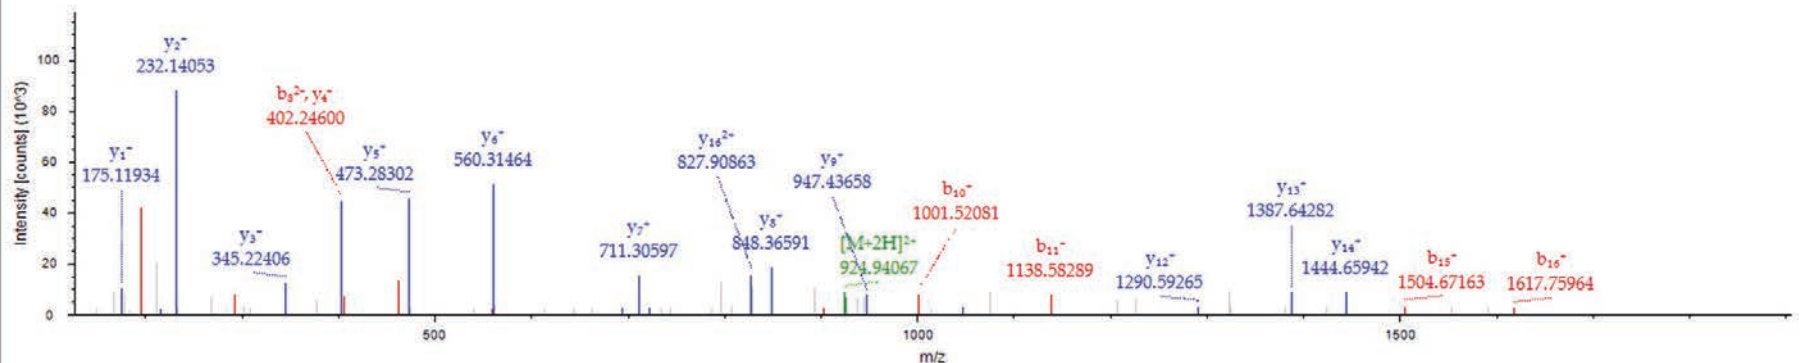

| Uniprot Accession | Description             | Gene name | PTP type     | Sequence                          | Hyperoxidised cysteine | Total MS/MS count |
|-------------------|-------------------------|-----------|--------------|-----------------------------------|------------------------|-------------------|
| F1QTI4            | Uncharacterized protein | ptpn9b    | Non-receptor | TLYPDWTGPPGGPPVV <b>VHcSAGIGR</b> | C19(hyper)             | 86                |

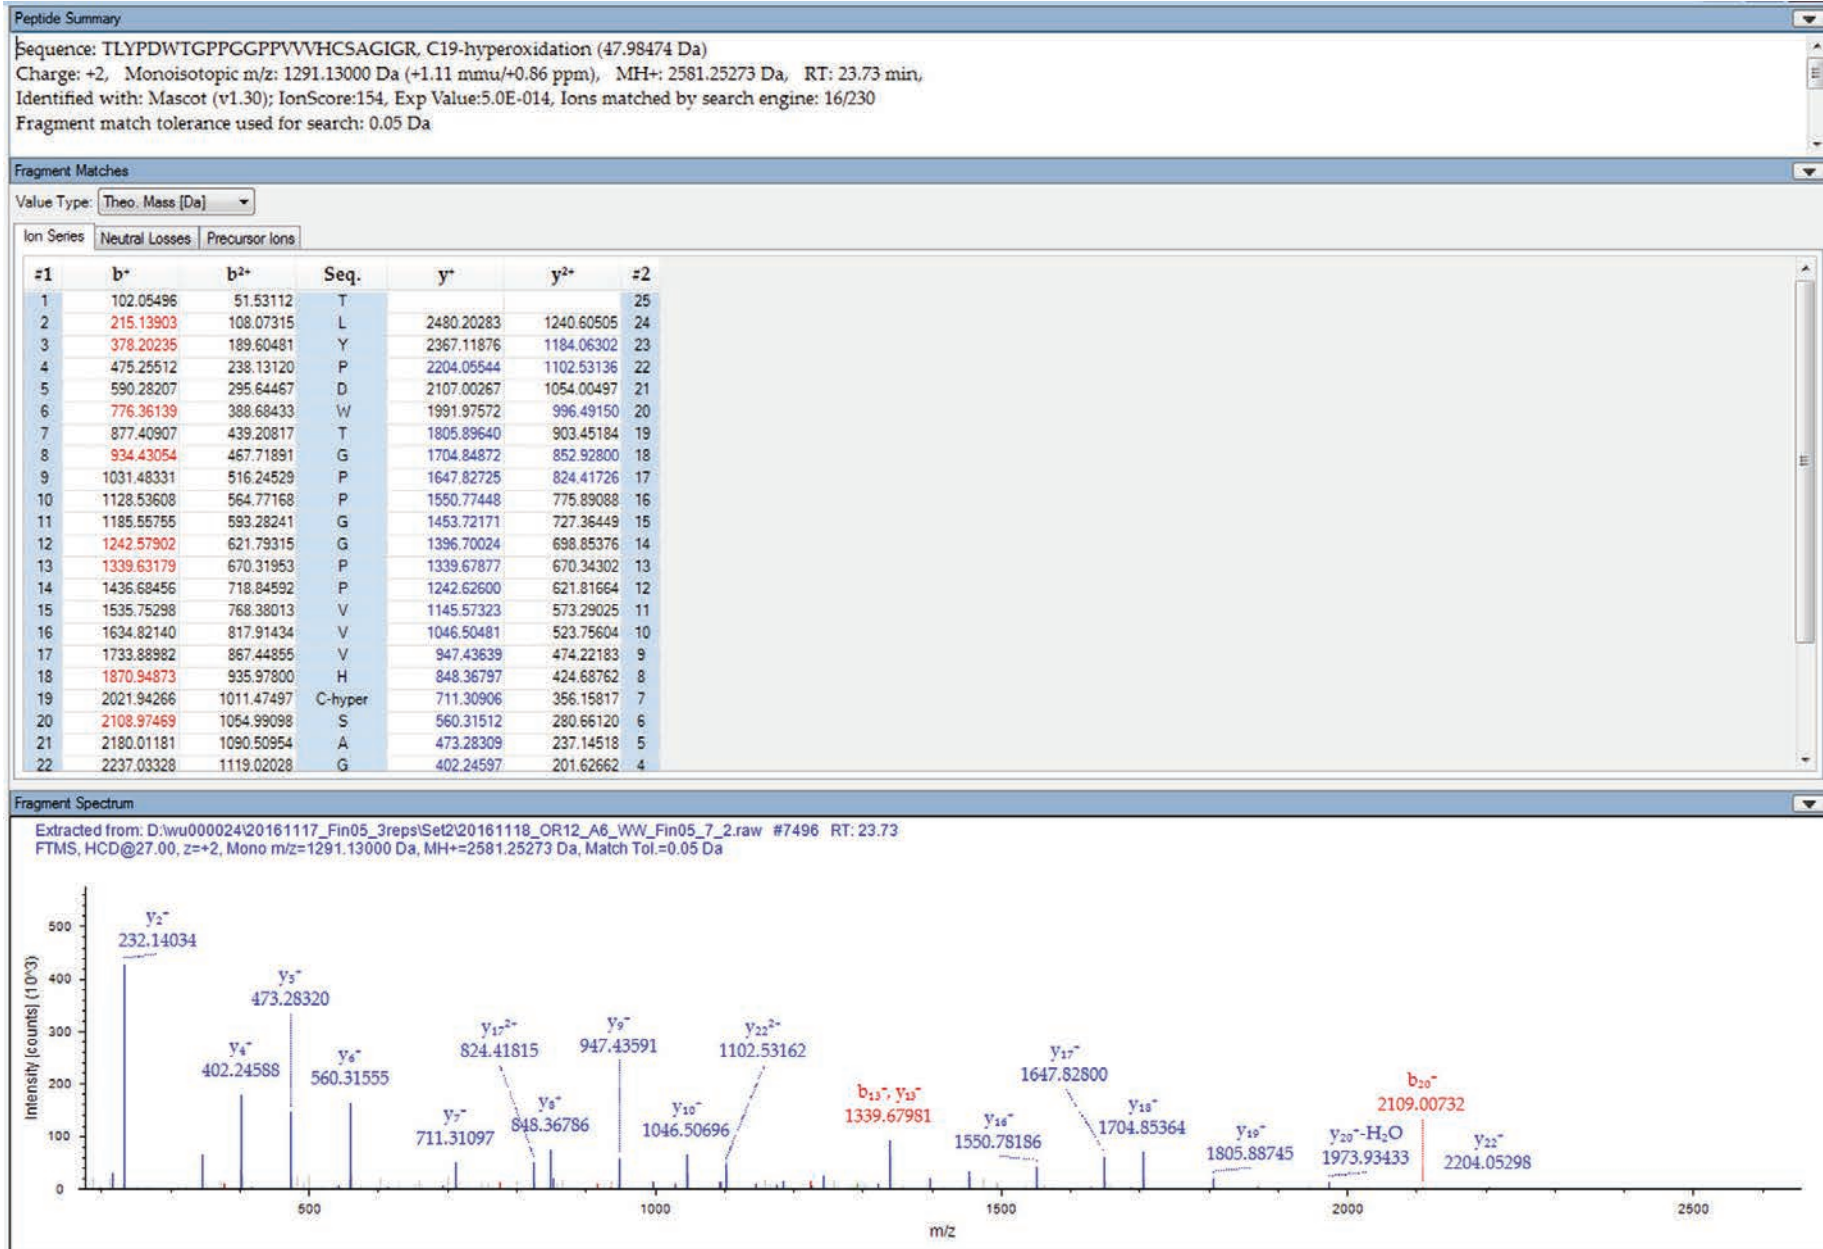



**Fig. S3. Zebrafish *ptpra* knock-out embryos (*ptpra*<sup>-/-</sup>) lack RPTP $\alpha$  protein.** Adult zebrafish heterozygous for *ptpra* (*ptpra*<sup>+/-</sup>) were in-crossed to generate *ptpra* knock-out embryos (*ptpra*<sup>-/-</sup>). At 4 dpf, individual embryos were cut in half: one half lysed for protein, and the other half lysed for DNA extraction. Following genotyping, protein lysates of *ptpra*<sup>+/+</sup>, *ptpra*<sup>+/-</sup>, and *ptpra*<sup>-/-</sup> embryos were pooled, and 5 embryo equivalents per condition were run on an SDS-PAGE gel, immunoblotted and probed with an Rptp $\alpha$ -specific antibody and with tubulin to monitor equal loading. Control lane represents wild-type TL zebrafish embryos at 3 dpf.

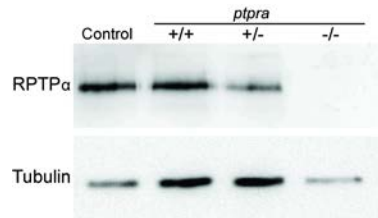

**Table S1. PTP motif peptides detected.** Conserved catalytic site sequence in blue. Position of hyperoxidized cysteine refers to residue number within a properly cleaved tryptic peptide, without missed cleavage. Total MS/MS count is the sum of all spectra obtained from each biological replicate of PV-treated sample. Peptides oxidized in the second fin clip are highlighted in grey.

| Uniprot Accession     | Description                                            | Gene name | PTP type     | Sequence                         | Hyperoxidized cysteine | Total MS/MS count |
|-----------------------|--------------------------------------------------------|-----------|--------------|----------------------------------|------------------------|-------------------|
| B3DJL5_site1 (C7U129) | Ptpra protein                                          | ptpra     | Receptor     | QQQQSGNHPIV <b>VHcSAGAGR</b>     | C14(hyper)             | 76                |
| B3DJL5_site2 (C7U129) | Ptpra protein                                          | ptpra     | Receptor     | NcNPQYAGPIVV <b>VHcSAGVGR</b>    | C14(hyper)             | 33                |
| A0A0R4ITJ9 (C7U135)   | Uncharacterized protein                                | ptprb     | Receptor     | TNSPGISV <b>VHcSAGVGR</b>        | C11(hyper)             | 51                |
| C7U126                | CD45 antigen (Fragment)                                | ptprc     | Receptor     | NFFSGPIVV <b>VHcSAGVGR</b>       | C11(hyper)             | 93                |
| E7EZG7_site1          | Receptor-type tyrosine-protein phosphatase             | ptprea    | Receptor     | QVNPYSYAGPIVV <b>VHcSAGVGR</b>   | C14(hyper)             | 35                |
| E7EZG7_site2          | Receptor-type tyrosine-protein phosphatase             | ptprea    | Receptor     | QQQQSGNHPII <b>VHcSAGAGR</b>     | C14(hyper)             | 119               |
| Q90YJ5_site1          | Receptor protein-tyrosine phosphatase LAR (Fragment)   | ptprfa    | Receptor     | AcNPPDAGPMVV <b>VHcSAGVGR</b>    | C14(hyper)             | 100               |
| Q90YJ5_site2          | Receptor protein-tyrosine phosphatase LAR (Fragment)   | ptprfa    | Receptor     | EQFGQDGPITV <b>VHcSAGVGR</b>     | C13(hyper)             | 72                |
| F1Q4V8                | Uncharacterized protein (Fragment)                     | ptprga    | Receptor     | SSAAQTPDMGPMVLV <b>VHcSAGVGR</b> | C16(hyper)             | 42                |
| E7F9R2                | Uncharacterized protein                                | ptprh     | Receptor     | QHIESHFSTGPTV <b>VHcSAGVGR</b>   | C16(hyper)             | 159               |
| B6HY54                | Protein-tyrosine phosphatase                           | ptprja    | Receptor     | HSPTLV <b>VHcSAGVGR</b>          | C8(hyper)              | 52                |
| X1WCM2                | Uncharacterized protein (Fragment)                     | ptprjb.1  | Receptor     | HSPTV <b>VHcSAGVGR</b>           | C8(hyper)              | 21                |
| X1WF45                | Uncharacterized protein (Fragment)                     | ptprjb.2  | Receptor     | EHMNQYScTSPVV <b>VHcSAGVGR</b>   | C16(hyper)             | 6                 |
| X1WD65                | Uncharacterized protein                                | ptprk     | Receptor     | MSNPPTAGPIVV <b>VHcSAGAGR</b>    | C14(hyper)             | 90                |
| A0A0R4IA95            | Uncharacterized protein (Fragment)                     | ptpro     | Receptor     | GPIVV <b>VHcSAGVGR</b>           | C7(hyper)              | 52                |
| Q90YJ4_site1          | Receptor protein-tyrosine phosphatase sigma (Fragment) | ptprsa    | Receptor     | EQFGQDGPISV <b>VHcSAGVGR</b>     | C13(hyper)             | 21                |
| Q90YJ4_site2          | Receptor protein-tyrosine phosphatase sigma (Fragment) | ptprsa    | Receptor     | TcNPPDAGPII <b>AHcSAGVGR</b>     | C14(hyper)             | 45                |
| A0A0R4ITF5 (C7U125)   | Uncharacterized protein                                | ptprub    | Receptor     | TSTPLDAGPVVV <b>VHcSVGAGR</b>    | C14(hyper)             | 13                |
| X1WET2                | Uncharacterized protein (Fragment)                     | ptprz1a   | Receptor     | AQTDGMGPMVV <b>VHcSAGVGR</b>     | C13(hyper)             | 16                |
| B8A5J4                | Uncharacterized protein                                | ptprz1b   | Receptor     | TAEMGPVVV <b>VHcSAGVGR</b>       | C11(hyper)             | 104               |
| C7U142                | Protein-tyrosine phosphatase 1B (Fragment)             | ptpn1     | Non-receptor | ESGcLSPELGPVV <b>VHcSAGIGR</b>   | C16(hyper)             | 142               |
| C7U151                | Protein-tyrosine phosphatase SHP-2a (Fragment)         | ptpn11a   | Non-receptor | QEGITGAGPIV <b>VHcSAGIGR</b>     | C14(hyper)             | 112               |
| C7U120                | Protein-tyrosine phosphatase SHP-2b (Fragment)         | ptpn11b   | Non-receptor | TQSAIPESGPIV <b>VHcSAGIGR</b>    | C15(hyper)             | 59                |
| Q6PEI4                | Protein tyrosine phosphatase, non-receptor type 12     | ptpn12    | Non-receptor | DTTPIC <b>VHcSAGcGR</b>          | C13(hyper)             | 71                |
| C7U124                | Protein-tyrosine phosphatase BAS (Fragment)            | ptpn13    | Non-receptor | HIHLSGPII <b>THcSAGIGR</b>       | C12(hyper)             | 64                |
| F1QIX3                | Uncharacterized protein                                | ptpn20    | Non-receptor | GPIT <b>VHcSAGIGR</b>            | C7(hyper)              | 38                |
| F1Q6T9                | Uncharacterized protein                                | ptpn21    | Non-receptor | NTNLPVLV <b>VHcSAGVGR</b>        | C10(hyper)             | 29                |
| C7U128                | Protein-tyrosine phosphatase LyPTP (Fragment)          | ptpn22    | Non-receptor | IYQDNEEIPId <b>HcSAGcGR</b>      | C18(hyper)             | 13                |
| F1R1D1                | Uncharacterized protein                                | ptpn23a   | Non-receptor | VScTHFQc <b>SAGAFAYLR</b>        | C8(hyper)              | 138               |
| F1QXQ5 (F1QG6)        | Tyrosine-protein phosphatase non-receptor type         | ptpn2a    | Non-receptor | ESGSLGPENGPVV <b>VHcSAGIGR</b>   | C16(hyper)             | 86                |
| Q6NY86                | Tyrosine-protein phosphatase non-receptor type         | ptpn2b    | Non-receptor | ESGSLGMEQGPVV <b>VHcSAGIGR</b>   | C16(hyper)             | 159               |
| F1QLN8                | Uncharacterized protein                                | ptpn3     | Non-receptor | QESVPLM <b>VHcSAGIGR</b>         | C10(hyper)             | 97                |
| C7U127                | Protein-tyrosine phosphatase MEG1a (Fragment)          | ptpn4a    | Non-receptor | DEPVV <b>VHcSAGIGR</b>           | C8(hyper)              | 19                |
| C7U113                | Protein-tyrosine phosphatase MEG1a (Fragment)          | ptpn4b    | Non-receptor | ADGPEPVV <b>VHcSAGIGR</b>        | C11(hyper)             | 156               |
| C7U118                | Protein-tyrosine phosphatase SHP-1 (Fragment)          | ptpn6     | Non-receptor | SSAPIV <b>VHcSAGIGR</b>          | C9(hyper)              | 82                |
| X1WV4                 | Uncharacterized protein (Fragment)                     | ptpn9a    | Non-receptor | GHPPLGPPMV <b>VHcSAGIGR</b>      | C12(hyper)             | 170               |
| F1QTI4                | Uncharacterized protein                                | ptpn9b    | Non-receptor | TLYPDWTGPPGPPVV <b>VHcSAGIGR</b> | C19(hyper)             | 86                |

**Table S2. PTP motif peptide oxidation in response to caudal fin amputation.** Mean spectra count and standard error obtained from 3 biological replicates. Peptides oxidized in second fin clip highlighted in grey. Student *t*-test statistics for difference between first and second fin clip reported as exact two-tailed *p*-value.

| Uniprot Accession     | Gene name | PTP type     | Total MS/MS count | First fin clip        |        |                        |         |                            |             | Second fin clip       |        |                        |         |                            |             | T.test (PV 1st clip: PV 2nd clip) | T.test (NEM 2nd clip : NEM 1st clip) |
|-----------------------|-----------|--------------|-------------------|-----------------------|--------|------------------------|---------|----------------------------|-------------|-----------------------|--------|------------------------|---------|----------------------------|-------------|-----------------------------------|--------------------------------------|
|                       |           |              |                   | Mean spectra count PV | SEM PV | Mean spectra count NEM | SEM NEM | Mean spectra count Control | SEM Control | Mean spectra count PV | SEM PV | Mean spectra count NEM | SEM NEM | Mean spectra count Control | SEM Control |                                   |                                      |
| B3DJL5_site1 (C7U129) | ptpra     | Receptor     | 76                | 13,0                  | 2,1    | 0,7                    | 0,3     | 0,0                        | 0,0         | 11,3                  | 1,2    | 0,3                    | 0,3     | 0,0                        | 0,0         | 0,62                              | 0,21                                 |
| B3DJL5_site2 (C7U129) | ptpra     | Receptor     | 33                | 6,7                   | 0,9    | 0,7                    | 0,7     | 0,0                        | 0,0         | 3,3                   | 0,9    | 0,3                    | 0,3     | 0,0                        | 0,0         | 0,20                              | 0,42                                 |
| AOAOR4ITJ9 (C7U135)   | ptprb     | Receptor     | 51                | 9,0                   | 0,6    | 0,0                    | 0,0     | 0,0                        | 0,0         | 8,0                   | 1,7    | 0,0                    | 0,0     | 0,0                        | 0,0         | 0,48                              | Not detected                         |
| C7U126                | ptprc     | Receptor     | 93                | 18,0                  | 1,7    | 0,3                    | 0,3     | 0,0                        | 0,0         | 12,3                  | 0,9    | 0,3                    | 0,3     | 0,0                        | 0,0         | 0,14                              | Not detected                         |
| E7EZG7_site1          | ptprea    | Receptor     | 35                | 6,3                   | 0,9    | 0,7                    | 0,7     | 0,0                        | 0,0         | 4,0                   | 1,2    | 0,7                    | 0,3     | 0,0                        | 0,0         | 0,12                              | 1,00                                 |
| E7EZG7_site2          | ptprea    | Receptor     | 119               | 18,0                  | 1,5    | 0,3                    | 0,3     | 0,0                        | 0,0         | 15,3                  | 0,9    | 6,0                    | 1,2     | 0,0                        | 0,0         | 0,37                              | 0,04                                 |
| Q90YJ5_site1          | ptprfa    | Receptor     | 100               | 22,0                  | 2,3    | 0,0                    | 0,0     | 0,0                        | 0,0         | 11,3                  | 0,7    | 0,0                    | 0,0     | 0,0                        | 0,0         | 0,07                              | Not detected                         |
| Q90YJ5_site2          | ptprfa    | Receptor     | 72                | 12,3                  | 1,8    | 0,3                    | 0,3     | 0,0                        | 0,0         | 11,0                  | 1,5    | 0,3                    | 0,3     | 0,0                        | 0,0         | 0,63                              | Not detected                         |
| F1Q4V8                | ptprga    | Receptor     | 42                | 8,7                   | 1,5    | 0,0                    | 0,0     | 0,0                        | 0,0         | 5,3                   | 0,3    | 0,0                    | 0,0     | 0,0                        | 0,0         | 0,20                              | Not detected                         |
| E7F9R2                | ptprh     | Receptor     | 159               | 22,0                  | 1,5    | 0,0                    | 0,0     | 0,0                        | 0,0         | 19,3                  | 2,0    | 11,7                   | 1,5     | 0,0                        | 0,0         | 0,38                              | 0,02                                 |
| B6HY54                | ptprja    | Receptor     | 52                | 8,0                   | 0,6    | 1,0                    | 0,0     | 0,0                        | 0,0         | 8,3                   | 0,9    | 0,0                    | 0,0     | 0,0                        | 0,0         | 0,83                              | Not detected                         |
| X1WCM2                | ptprjb.1  | Receptor     | 21                | 4,0                   | 1,2    | 0,0                    | 0,0     | 0,0                        | 0,0         | 3,0                   | 1,0    | 0,0                    | 0,0     | 0,0                        | 0,0         | 0,68                              | Not detected                         |
| X1WF45                | ptprjb.2  | Receptor     | 6                 | 1,0                   | 0,0    | 0,0                    | 0,0     | 0,0                        | 0,0         | 0,7                   | 0,3    | 0,3                    | 0,3     | 0,0                        | 0,0         | 0,42                              | 0,42                                 |
| X1WD65                | ptprk     | Receptor     | 90                | 16,7                  | 0,9    | 0,0                    | 0,0     | 0,0                        | 0,0         | 13,0                  | 0,6    | 0,3                    | 0,3     | 0,0                        | 0,0         | 0,05                              | 0,42                                 |
| AOAOR4IA95            | ptpro     | Receptor     | 52                | 8,3                   | 0,9    | 0,3                    | 0,3     | 0,0                        | 0,0         | 8,3                   | 1,2    | 0,3                    | 0,3     | 0,0                        | 0,0         | 1,00                              | Not detected                         |
| Q90YJ4_site1          | ptprsa    | Receptor     | 21                | 4,0                   | 0,6    | 0,0                    | 0,0     | 0,0                        | 0,0         | 2,7                   | 0,3    | 0,3                    | 0,3     | 0,0                        | 0,0         | 0,06                              | 0,42                                 |
| Q90YJ4_site2          | ptprsa    | Receptor     | 45                | 8,0                   | 1,0    | 0,0                    | 0,0     | 0,0                        | 0,0         | 7,0                   | 1,7    | 0,0                    | 0,0     | 0,0                        | 0,0         | 0,42                              | Not detected                         |
| AOAOR4ITF5 (C7U125)   | ptprub    | Receptor     | 13                | 2,3                   | 0,3    | 0,0                    | 0,0     | 0,0                        | 0,0         | 2,0                   | 0,0    | 0,0                    | 0,0     | 0,0                        | 0,0         | 0,42                              | Not detected                         |
| X1WET2                | ptprz1a   | Receptor     | 16                | 3,7                   | 0,3    | 0,0                    | 0,0     | 0,0                        | 0,0         | 1,3                   | 0,3    | 0,3                    | 0,3     | 0,0                        | 0,0         | 0,07                              | 0,42                                 |
| B8A514                | ptprz1b   | Receptor     | 104               | 21,7                  | 2,4    | 0,0                    | 0,0     | 0,0                        | 0,0         | 12,7                  | 1,5    | 0,3                    | 0,3     | 0,0                        | 0,0         | 0,12                              | 0,42                                 |
| C7U142                | ptpn1     | Non-receptor | 142               | 22,0                  | 2,1    | 0,7                    | 0,7     | 0,3                        | 0,3         | 20,7                  | 1,5    | 3,7                    | 0,7     | 0,0                        | 0,0         | 0,73                              | 0,04                                 |
| C7U151                | ptpn11a   | Non-receptor | 112               | 14,7                  | 1,5    | 0,7                    | 0,3     | 0,3                        | 0,3         | 11,3                  | 0,9    | 10,3                   | 0,9     | 0,0                        | 0,0         | 0,27                              | 0,00                                 |
| C7U120                | ptpn11b   | Non-receptor | 59                | 7,3                   | 0,3    | 0,0                    | 0,0     | 0,0                        | 0,0         | 5,0                   | 0,6    | 7,3                    | 0,7     | 0,0                        | 0,0         | 0,07                              | 0,01                                 |
| Q6PEI4                | ptpn12    | Non-receptor | 71                | 13,0                  | 1,2    | 0,0                    | 0,0     | 0,0                        | 0,0         | 10,7                  | 1,5    | 0,0                    | 0,0     | 0,0                        | 0,0         | 0,46                              | Not detected                         |
| C7U124                | ptpn13    | Non-receptor | 64                | 13,3                  | 2,0    | 1,0                    | 0,6     | 0,0                        | 0,0         | 6,7                   | 0,7    | 0,3                    | 0,3     | 0,0                        | 0,0         | 0,12                              | 0,53                                 |
| F1QIX3                | ptpn20    | Non-receptor | 38                | 7,0                   | 1,0    | 0,0                    | 0,0     | 0,0                        | 0,0         | 5,7                   | 1,2    | 0,0                    | 0,0     | 0,0                        | 0,0         | 0,06                              | Not detected                         |
| F1Q6T9                | ptpn21    | Non-receptor | 29                | 4,0                   | 0,6    | 1,0                    | 0,6     | 0,0                        | 0,0         | 4,3                   | 1,2    | 0,3                    | 0,3     | 0,0                        | 0,0         | 0,67                              | 0,42                                 |
| C7U128                | ptpn22    | Non-receptor | 13                | 3,0                   | 0,0    | 0,0                    | 0,0     | 0,0                        | 0,0         | 1,0                   | 0,6    | 0,3                    | 0,3     | 0,0                        | 0,0         | 0,07                              | 0,42                                 |
| F1R1D1                | ptpn23a   | Non-receptor | 138               | 24,7                  | 2,0    | 0,0                    | 0,0     | 0,0                        | 0,0         | 21,0                  | 1,5    | 0,3                    | 0,3     | 0,0                        | 0,0         | 0,39                              | 0,42                                 |
| F1QXQ5 (F1QGX6)       | ptpn2a    | Non-receptor | 86                | 15,7                  | 0,7    | 0,3                    | 0,3     | 0,0                        | 0,0         | 9,7                   | 0,9    | 3,0                    | 0,6     | 0,0                        | 0,0         | 0,06                              | 0,04                                 |
| Q6NY86                | ptpn2b    | Non-receptor | 159               | 32,7                  | 2,8    | 0,3                    | 0,3     | 0,0                        | 0,0         | 19,7                  | 3,3    | 0,0                    | 0,0     | 0,3                        | 0,3         | 0,16                              | 0,42                                 |
| F1QLN8                | ptpn3     | Non-receptor | 97                | 17,0                  | 1,5    | 0,7                    | 0,3     | 0,0                        | 0,0         | 14,3                  | 2,3    | 0,3                    | 0,3     | 0,0                        | 0,0         | 0,37                              | 0,42                                 |
| C7U127                | ptpn4a    | Non-receptor | 19                | 3,3                   | 0,3    | 0,0                    | 0,0     | 0,0                        | 0,0         | 3,0                   | 1,2    | 0,0                    | 0,0     | 0,0                        | 0,0         | 0,81                              | Not detected                         |
| C7U113                | ptpn4b    | Non-receptor | 156               | 27,7                  | 1,5    | 0,0                    | 0,0     | 0,0                        | 0,0         | 22,3                  | 0,7    | 5,7                    | 0,3     | 0,0                        | 0,0         | 0,09                              | 0,00                                 |
| C7U118                | ptpn6     | Non-receptor | 82                | 15,7                  | 1,5    | 0,7                    | 0,7     | 0,3                        | 0,3         | 10,3                  | 0,3    | 0,0                    | 0,0     | 0,3                        | 0,3         | 0,09                              | 0,42                                 |
| X1WV4                 | ptpn9a    | Non-receptor | 170               | 28,7                  | 1,9    | 0,3                    | 0,3     | 0,0                        | 0,0         | 22,3                  | 1,5    | 5,3                    | 0,9     | 0,0                        | 0,0         | 0,18                              | 0,01                                 |
| F1QT14                | ptpn9b    | Non-receptor | 86                | 16,3                  | 0,9    | 0,7                    | 0,3     | 0,0                        | 0,0         | 11,3                  | 1,5    | 0,3                    | 0,3     | 0,0                        | 0,0         | 0,13                              | 0,42                                 |
